# Supplementary material for: Enantioselective reductive allylic alkylation enabled by dual photoredox/palladium catalysis
Source: Royal Society of Chemistry journal article supplement (doi:10.1039/d2cc06705f), 2023-01-01
Supplement: d2cc06705f1.pdf [file d2cc06705f1.pdf]

# Supporting Information

## Enantioselective reductive allylic alkylation enabled by dual photoredox/palladium catalysis

Sheng Tang,<sup>a</sup> Hong-Hao Zhang,<sup>\*ab</sup> Shouyun Yu<sup>\*a</sup>

<sup>a</sup> State Key Laboratory of Analytical Chemistry for Life Science, Jiangsu Key Laboratory of Advanced Organic Materials, Chemistry and Biomedicine Innovation Centre (ChemBIC), School of Chemistry and Chemical Engineering, Nanjing University, Nanjing 210023, China.

E-mail: yushouyun@nju.edu.cn

<sup>b</sup> School of Petrochemical Engineering, Changzhou University, Changzhou 213164, China.

E-mail: zhanghonghao@cczu.edu.cn

### Table of Contents

|                                                                           |     |
|---------------------------------------------------------------------------|-----|
| 1. General information.....                                               | S2  |
| 2. Numberings and structures of all compounds.....                        | S3  |
| 3. General procedure for the synthesis of racemic products <b>3</b> ..... | S7  |
| 4. General procedure for asymmetric allylic alkylation.....               | S8  |
| 5. Gram-scale preparation of <b>3a</b> .....                              | S10 |
| 6. Optimization of the conditions for <b>3a</b> .....                     | S11 |
| 7. Proof of stereochemistry.....                                          | S15 |
| 8. Mechanism Study.....                                                   | S18 |
| 9. Product characterization.....                                          | S21 |
| 10. Attempt of other alkyl bromides.....                                  | S38 |
| 11. References.....                                                       | S39 |
| 12. NMR spectra for all compounds.....                                    | S40 |
| 13. HPLC spectra.....                                                     | S72 |

## 1. General information

Commercial reagents were purchased from Aldrich Chemical, Alfa Aesar, TCI, Strem, Acros, Energy Chemical, J&K Chemical, Innochem and were used as received. All catalytic reactions were run in dried glassware. Thin layer chromatography (TLC) was performed on EMD precoated plates (silica gel 60 F254, Art 5715) and visualized by fluorescence quenching under UV light and by staining with phosphomolybdic acid or potassium permanganate, respectively. Column chromatography was performed on EMD Silica Gel 60 (300–400 Mesh) using a forced flow of 0.5–1.0 bar.  $^1\text{H}$  NMR (400 MHz),  $^{13}\text{C}$  NMR (100 MHz) and  $^{19}\text{F}$  (376 MHz) were measured on a Bruker AVANCE III–400 spectrometer. Chemical shifts are expressed in parts per million (ppm) with respect to the residual solvent peak. Coupling constants are reported as Hertz (Hz), signal shapes and splitting patterns are indicated as follows: s, singlet; d, doublet; t, triplet; q, quartet; m, multiplet. GC-MS spectra were performed on Agilent 5977A Series (EI Source). High Resolution Mass spectra were performed on Agilent 1260 Series (ESI Source). High-pressure liquid chromatography (HPLC) was performed on Agilent 1260 Series chromatographs using chiral columns as noted for each compound. Optical rotations were measured on an automatic polarimeter with  $[\alpha]_{\text{D}}^{20}$  values reported in degrees; concentration (c) is in g/100 mL.

The allylic acetates (**1**)<sup>1</sup> and alkyl bromides (**2**)<sup>2</sup> and chiral allylic acetate (*S*)-**10**'<sup>3</sup> were prepared according to the literature procedure.

## 2. Numberings and structures of all compounds

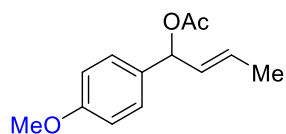

1a

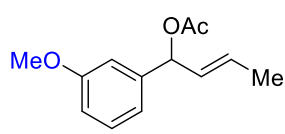

1b

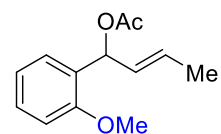

1c

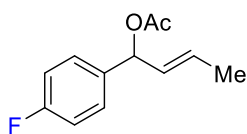

1d

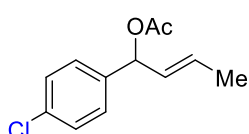

1e

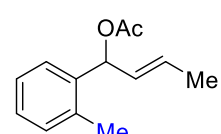

1f

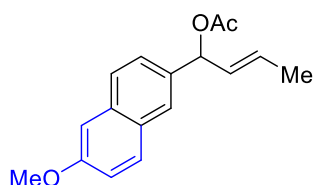

1g

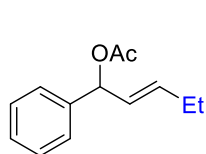

1h

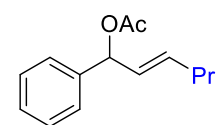

1i

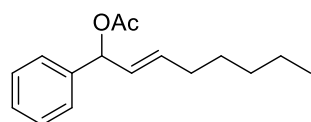

1j

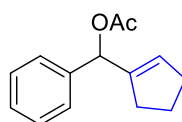

1k

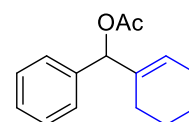

1l

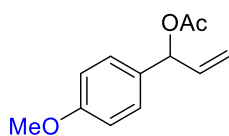

1m

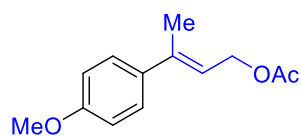

1n

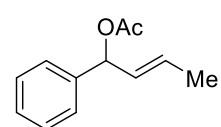

1o

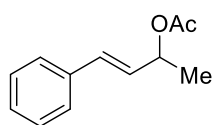

1o'

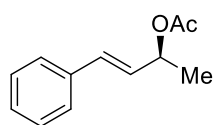

(S)-1o'

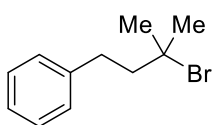

2a

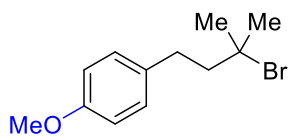

2b

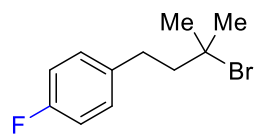

2c

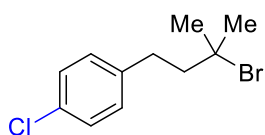

2d

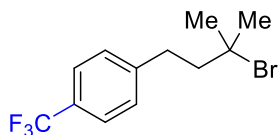

2e

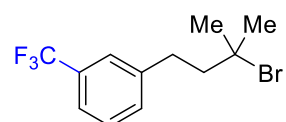

2f

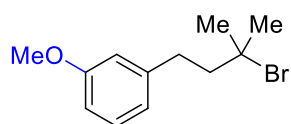

2g

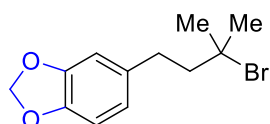

2h

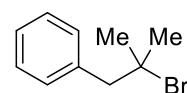

2i

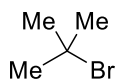

2j

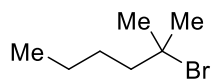

2k

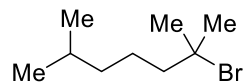

2l

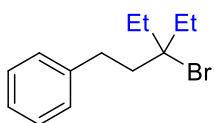

2m

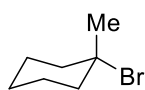

2n

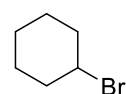

2o

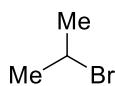

2p

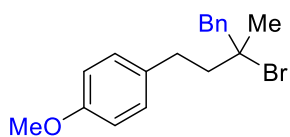

2q

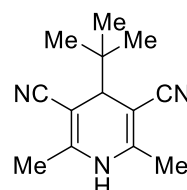

6

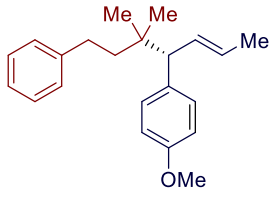

3a

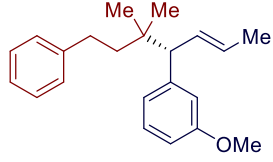

3b

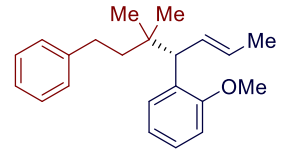

3c

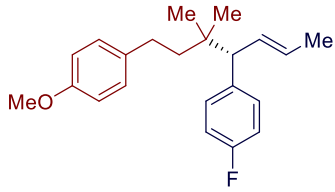

3d

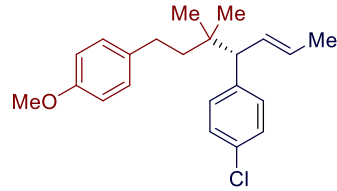

3e

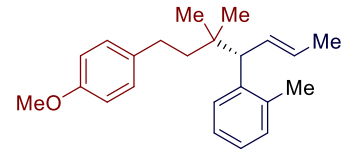

3f

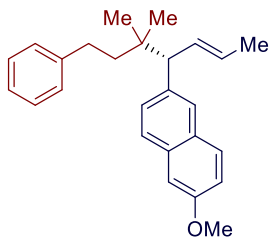

3g

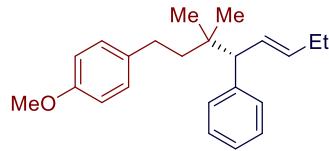

3h

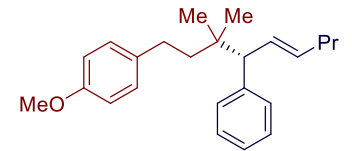

3i

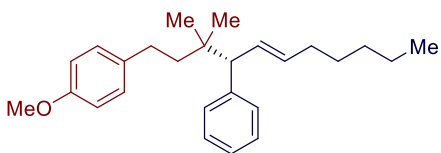

3j

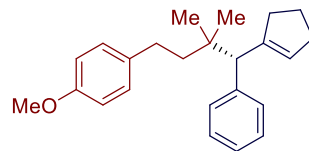

3k

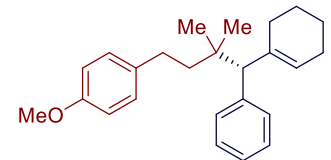

3l

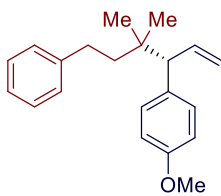

3m

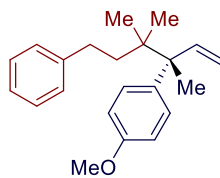

3n

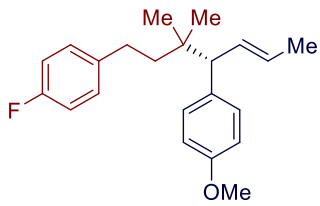

**3o**

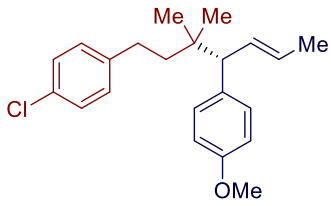

**3p**

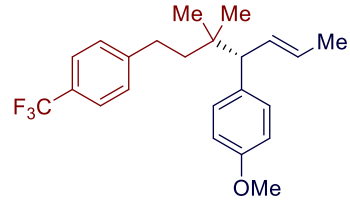

**3q**

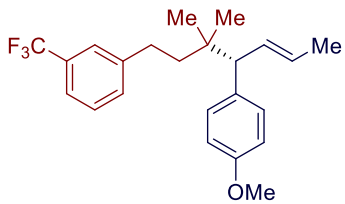

**3r**

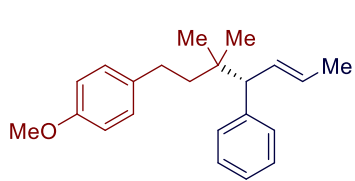

**3s**

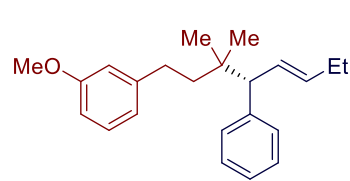

**3t**

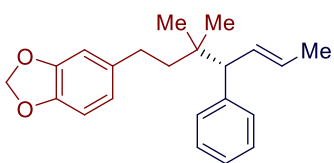

**3u**

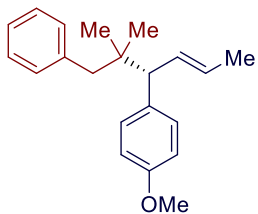

**3v**

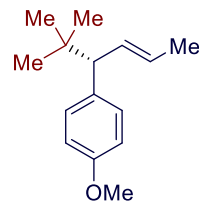

**3w**

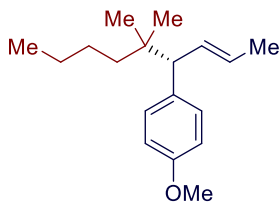

**3x**

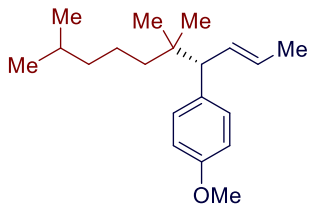

**3y**

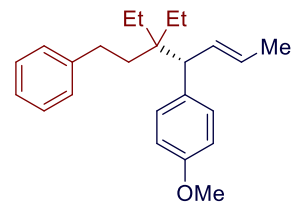

**3z**

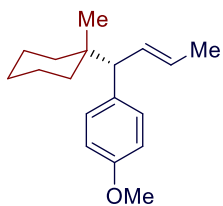

**3aa**

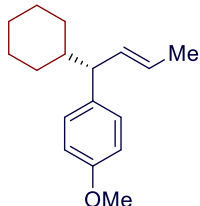

**3ab**

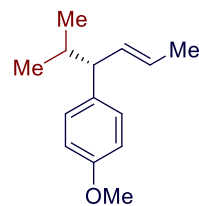

**3ac**

### 3. General procedure for the synthesis of racemic products 3

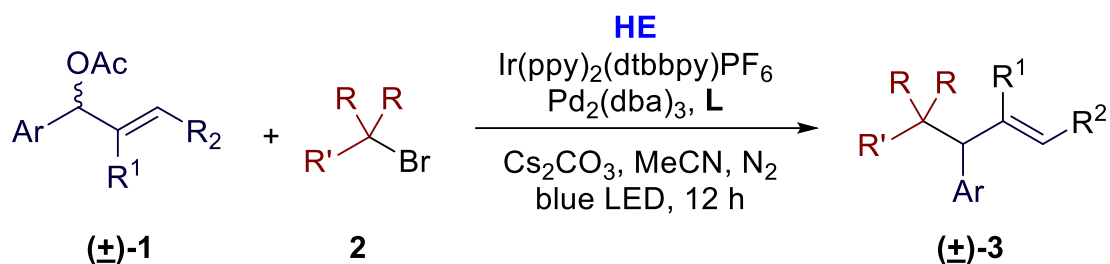

**General Procedure A:** In a nitrogen-filled glovebox, an 8 mL screw-cap test tube, equipped with a magnetic stir bar, charged with Pd<sub>2</sub>(dba)<sub>3</sub> (2.3 mg, 0.0025 mmol, 2.5 mol%), racemic-2,2'-bis(diphenylphosphino)-1,1'-binaphthyl (3.7 mg, 0.006 mmol, 6 mol%), anhydrous MeCN (2.0 mL) was added and the mixture was stirred for 30 min. Then the following chemicals were added in turn: Ir(ppy)<sub>2</sub>(dtbbpy)PF<sub>6</sub> (2.0 mg, 0.002 mmol, 2.0 mol%), Cs<sub>2</sub>CO<sub>3</sub> (65.2 mg, 0.2 mmol, 2.0 equiv), HE (50.7 mg, 0.2 mmol, 2.0 equiv), allylic acetates **1** (0.1 mmol, 1.0 equiv), alkyl bromides **2** (0.3 mmol, 3.0 equiv) and anhydrous MeCN (2.0 mL). The reaction tube was sealed with a Teflon screw cap, removed from the glove box. The reaction mixture was stirred vigorously under 45W blue LED lights at room temperature for 12h. Next, the reaction mixture was transferred to a 250 mL separatory funnel, rinsed/diluted with 100 mL ether, and washed with 100 mL deionized water (twice) and finally 100 mL brine. The organic phase was concentrated under vacuum and purified by chromatography.

#### 4. General procedure for asymmetric allylic alkylation

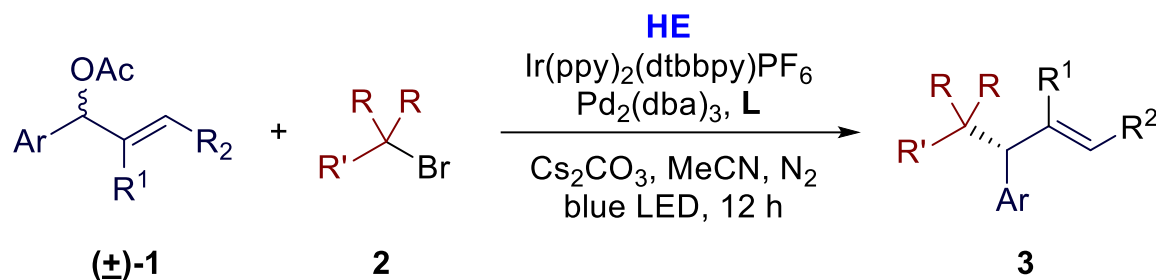

**General Procedure B (in-glovebox):** In a nitrogen-filled glovebox, an 8 mL screw-cap test tube, equipped with a magnetic stir bar, charged with Pd<sub>2</sub>(dba)<sub>3</sub> (2.3 mg, 0.0025 mmol, 2.5 mol%), (*R*)-2,2'-bis((3,5-di-*tert*-butyl-4-methoxyphenyl)-λ<sup>2</sup>-phosphaneyl)-1,1'-binaphthalene (**L1**) (7.4 mg, 0.006 mmol, 6 mol%), anhydrous MeCN (2.0 mL) was added and the mixture was stirred for 30 min. Then the following chemicals were added in turn: Ir(ppy)<sub>2</sub>(dtbbpy)PF<sub>6</sub> (2.0 mg, 0.002 mmol, 2.0 mol%), Cs<sub>2</sub>CO<sub>3</sub> (65.2 mg, 0.2 mmol, 2.0 equiv), HE (50.7 mg, 0.2 mmol, 2.0 equiv), allylic acetates **1** (0.1 mmol, 1.0 equiv), alkyl bromides **2** (0.3 mmol, 3.0 equiv) and anhydrous MeCN (2.0 mL). The reaction tube was sealed with a Teflon screw cap, removed from the glove box. The reaction mixture was stirred vigorously under 45W blue LED lights at room temperature for 12h. Next, the reaction mixture was transferred to a 250 mL separatory funnel, rinsed/diluted with 100 mL ether, and washed with 100 mL deionized water (twice) and finally 100 mL brine. The organic phase was concentrated under vacuum and purified by chromatography.

**General Procedure B':** In a nitrogen-filled glovebox, an 8 mL screw-cap test tube, equipped with a magnetic stir bar, charged with Pd<sub>2</sub>(dba)<sub>3</sub> (2.3 mg, 0.0025 mmol, 2.5 mol%), (*R*)-2,2'-bis((3,5-di-*tert*-butyl-4-methoxyphenyl)-λ<sup>2</sup>-phosphaneyl)-1,1'-binaphthalene (**L1**) (7.4 mg, 0.006 mmol, 6 mol%), anhydrous MeCN (2.0 mL) was added and the mixture was stirred for 30 min. Then the following chemicals were added in turn: Ir(ppy)<sub>2</sub>(dtbbpy)PF<sub>6</sub> (2.0 mg, 0.002 mmol, 2.0 mol%), Cs<sub>2</sub>CO<sub>3</sub> (65.2 mg, 0.2 mmol, 2.0 equiv), HE (50.7 mg, 0.2 mmol, 2.0 equiv), allylic acetates **1** (0.1 mmol, 1.0 equiv), alkyl bromides **2** (0.3 mmol, 3.0 equiv) and anhydrous MeCN (2.0 mL). The reaction tube was sealed with a Teflon screw cap, removed from the glove box. The reaction mixture was stirred vigorously under 45W blue LED lights at 0 °C for 12h. Next, the reaction mixture was transferred to a 250 mL separatory funnel, rinsed/diluted with 100 mL ether, and washed with 100 mL deionized water (twice) and finally 100 mL brine. The organic phase was concentrated under vacuum and purified by chromatography.



## Reaction Setup

Medium-sized screw-cap test tubes (8 mL) were used for all 0.1 mmol scale reactions: Fisher 13 x 100 mm tubes (Cat. No. 14-959-35C)

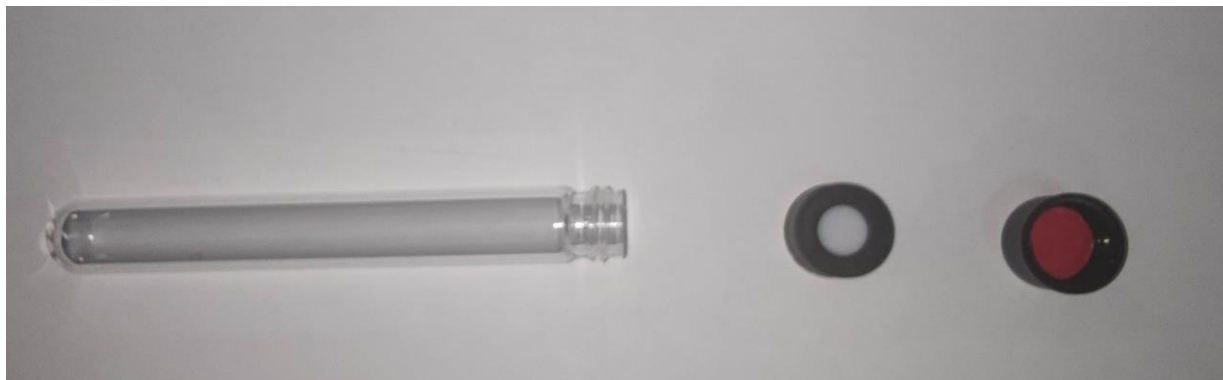

Cap with Septa: Thermo Scientific ASM PHN CAP w/PTFE/SIL (Cat. No. 03378316)

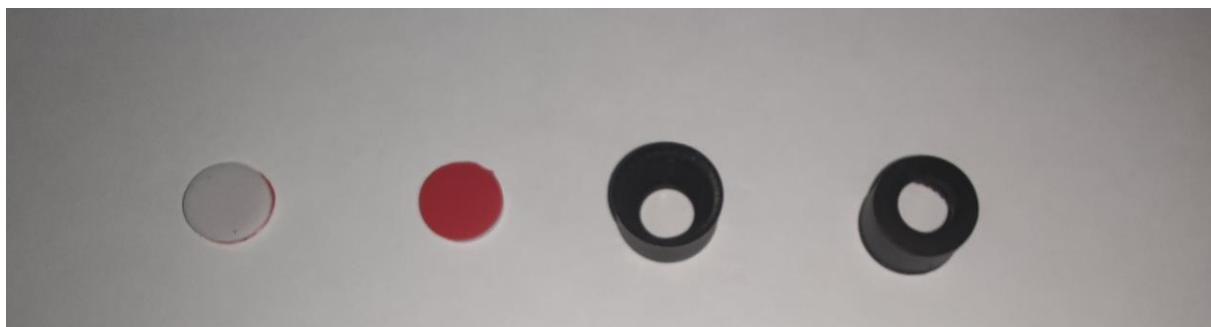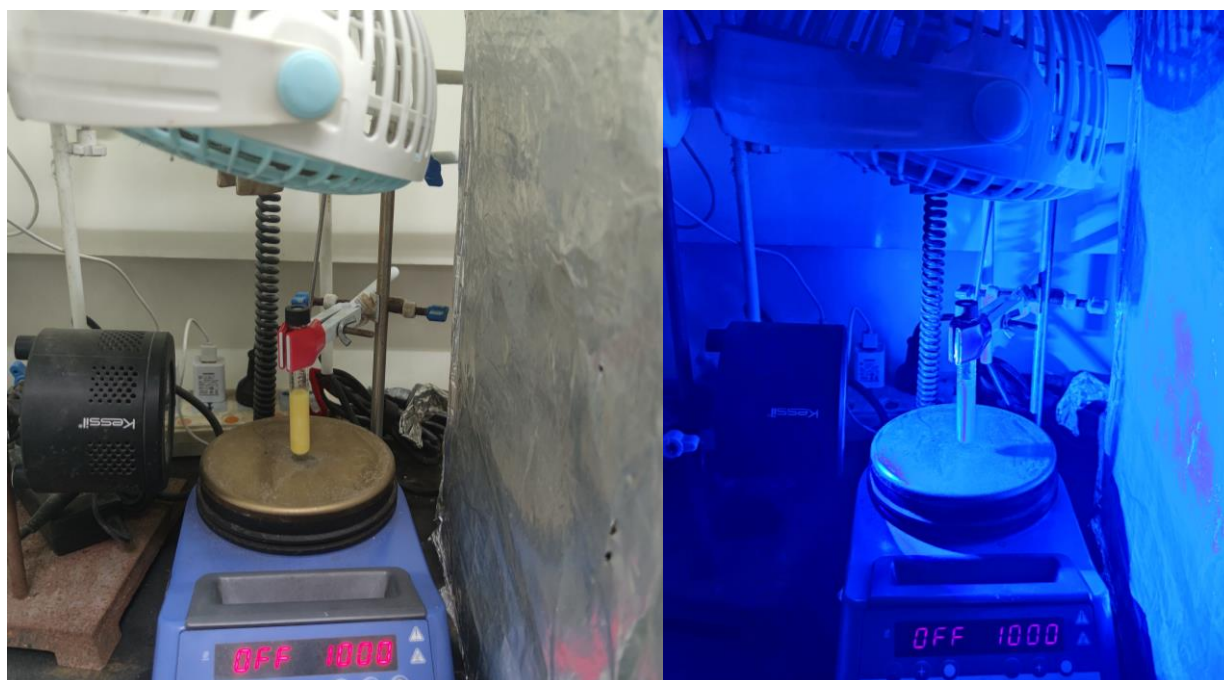

## 5. Gram-scale preparation of 3a

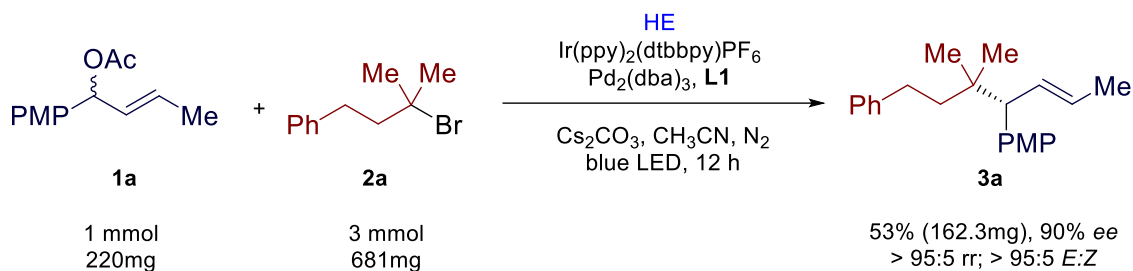

In a nitrogen-filled glovebox, a 500 mL round bottom flask, equipped with a magnetic stir bar, charged with  $\text{Pd}_2(\text{dba})_3$  (23 mg, 0.025 mmol, 2.5 mol%), (*R*)-2,2'-bis((3,5-di-*tert*-butyl-4-methoxyphenyl)- $\lambda^2$ -phosphaneyl)-1,1'-binaphthalene (**L1**) (74 mg, 0.06 mmol, 6 mol%), anhydrous  $\text{CH}_3\text{CN}$  (50.0 mL) was added and the mixture was stirred for 30 min. Then the following chemicals were added in turn:  $\text{Ir(ppy)}_2(\text{dtbbpy})\text{PF}_6$  (20.0 mg, 0.02 mmol, 2.0 mol%),  $\text{Cs}_2\text{CO}_3$  (652 mg, 2 mmol, 2.0 equiv), **HE** (50.7 mg, 2 mmol, 2.0 equiv), allylic acetates **1a** (220 mg, 1 mmol, 1.0 equiv), alkyl bromides **2a** (681 mg, 3 mmol, 3.0 equiv) and anhydrous  $\text{CH}_3\text{CN}$  (50.0 mL). The reaction tube was sealed with a Teflon screw cap, removed from the glove box. The reaction mixture was stirred vigorously under 45W blue LED lights at room temperature for 12h.

The reaction mixture was then transferred to a 500 mL separatory funnel, rinsed/diluted with 200 mL ether, and washed with 200 mL deionized water (twice) and finally 100 mL brine. The organic phase was concentrated under vacuum and purified by chromatography (53% (162.3mg); 90% *ee*; > 95:5 *rr*; > 95:5 *E:Z*).

## 6. Optimization of the conditions for 3a

**Table S1.** Screening of the chiral ligands<sup>a</sup>

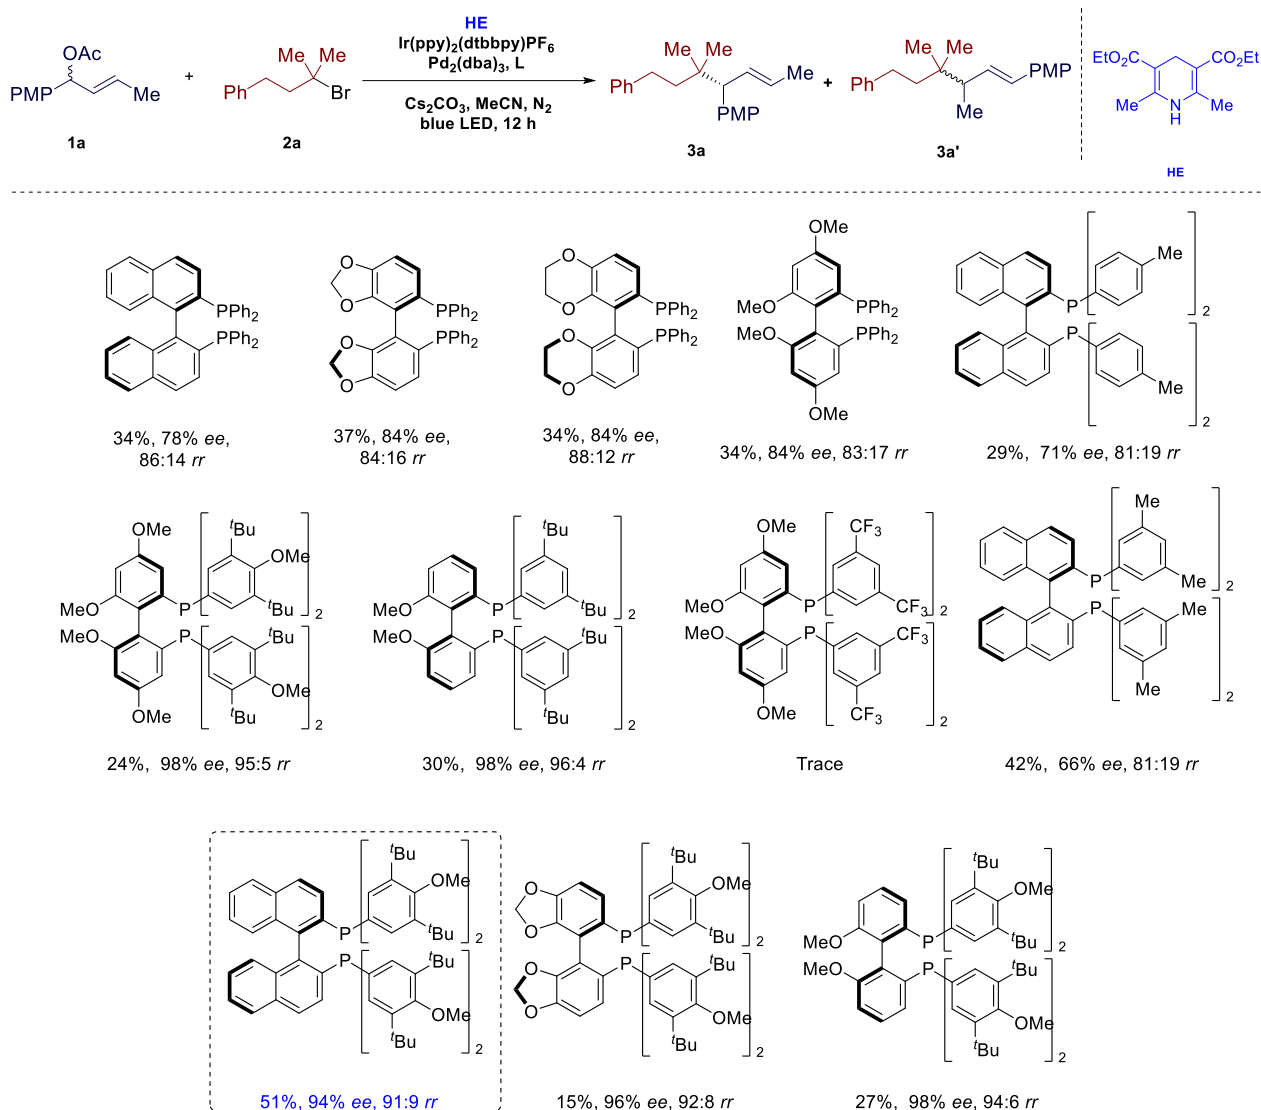

<sup>a</sup>Reaction conditions: **1a** (0.1 mmol), **2a** (0.15 mmol), HE (0.2 mmol), Cs<sub>2</sub>CO<sub>3</sub> (0.2 mmol), Pd<sub>2</sub>(dba)<sub>3</sub> (2.5 mol %), ligand (6 mol %), and Ir(ppy)<sub>2</sub>(dtbbpy)PF<sub>6</sub> (2 mol %) in MeCN (4.0 mL) was irradiated by 45 W blue LEDs for 12 h. <sup>b</sup>The yield and regioselectivity (*rr*) were determined by GC. <sup>c</sup>Enantiomeric excess (*ee*) values determined by HPLC on a chiral stationary phase. PMP = *para*-methoxyphenyl.

**Table S2.** Screening of the reductant<sup>a</sup>

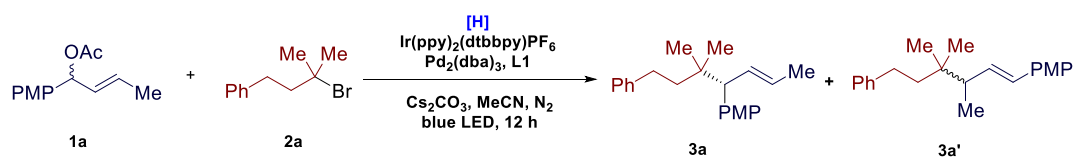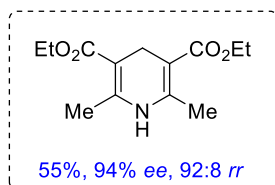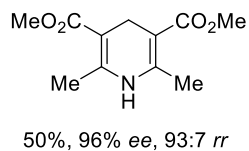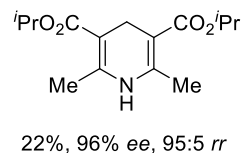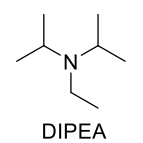

23%, 92% ee,  
92:8 rr

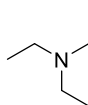

15%, 94% ee,  
92:8 rr

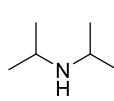

trace

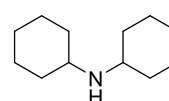

trace

<sup>a</sup>Reaction conditions: **1a** (0.1 mmol), **2a** (0.15 mmol), the reductant (0.2 mmol),  $\text{Cs}_2\text{CO}_3$  (0.2 mmol),  $\text{Pd}_2(\text{dba})_3$  (2.5 mol %), ligand (6 mol %), and  $\text{Ir}(\text{ppy})_2(\text{dtbbpy})\text{PF}_6$  (2 mol %) in MeCN (4.0 mL) was irradiated by 45 W blue LEDs for 12 h. <sup>b</sup>The yield and regioselectivity (*rr*) were determined by GC. <sup>c</sup>Enantiomeric excess (*ee*) values determined by HPLC on a chiral stationary phase. PMP = *para*-methoxyphenyl.

**Table S3: Examination of Photocatalysts<sup>a</sup>**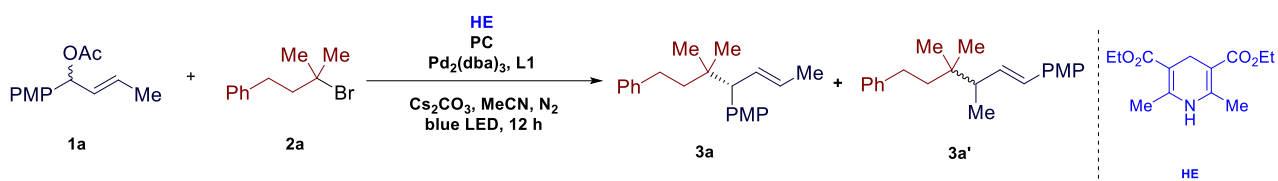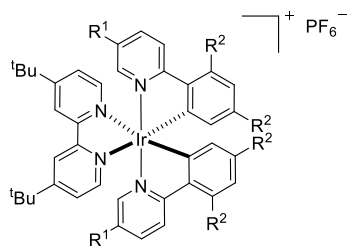

R<sup>1</sup> = R<sup>2</sup> = H, Ir(ppy)<sub>2</sub>(dtbbpy)PF<sub>6</sub> (I):  
51%, 94% ee, 92:8 rr

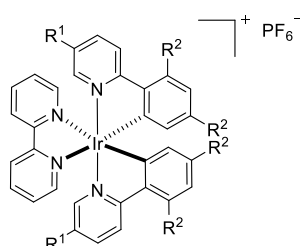

R<sup>1</sup> = R<sup>2</sup> = H, Ir(ppy)<sub>2</sub>(bpy)PF<sub>6</sub> (IV):  
30%, 94% ee, 94:6 rr

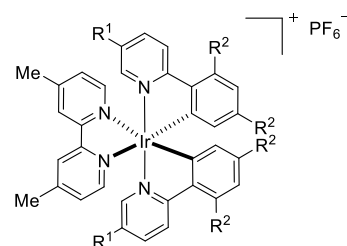

R<sup>1</sup> = R<sup>2</sup> = H, Ir(ppy)<sub>2</sub>(dMebpy)PF<sub>6</sub> (VII):  
30%, 94% ee, 94:6 rr

R<sup>1</sup> = CF<sub>3</sub>; R<sup>2</sup> = F, Ir(dFCF<sub>3</sub>ppy)<sub>2</sub>(dtbbpy)PF<sub>6</sub> (II):  
N.D.

R<sup>1</sup> = CF<sub>3</sub>; R<sup>2</sup> = F, Ir(dFCF<sub>3</sub>ppy)<sub>2</sub>(bpy)PF<sub>6</sub> (V):  
N.D.

R<sup>1</sup> = CF<sub>3</sub>; R<sup>2</sup> = F, Ir(dFCF<sub>3</sub>ppy)<sub>2</sub>(dMebpy)PF<sub>6</sub> (VIII):  
N.D.

R<sup>1</sup> = CH<sub>3</sub>; R<sup>2</sup> = F, Ir(dFMepPy)<sub>2</sub>(dtbbpy)PF<sub>6</sub> (III):  
29%, 96% ee, 93:7 rr

R<sup>1</sup> = CH<sub>3</sub>; R<sup>2</sup> = F, Ir(dFMepPy)<sub>2</sub>(bpy)PF<sub>6</sub> (VI):  
27%, 94% ee, 93:7 rr

<sup>a</sup>Reaction conditions: **1a** (0.1 mmol), **2a** (0.15 mmol), HE (0.2 mmol), Cs<sub>2</sub>CO<sub>3</sub> (0.2 mmol), Pd<sub>2</sub>(dba)<sub>3</sub> (2.5 mol %), L1 (6 mol %), and PC (2 mol %) in MeCN (4.0 mL) was irradiated by 45 W blue LEDs for 12 h. <sup>b</sup>The yield and regioselectivity (*rr*) were determined by GC. <sup>c</sup>Enantiomeric excess (*ee*) values determined by HPLC on a chiral stationary phase. PMP = *para*-methoxyphenyl.

**Table S4.** Reaction conditions optimization<sup>a</sup>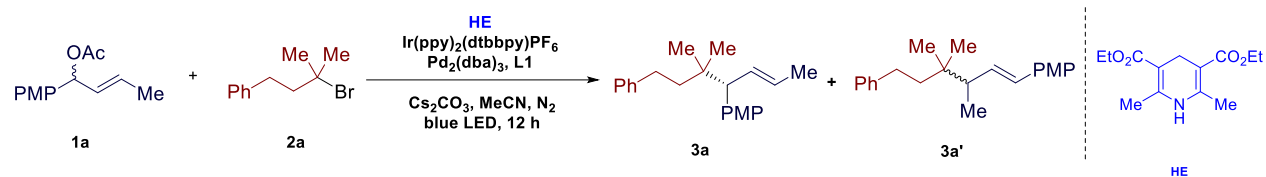

| Entry | <b>2a</b> (x mmol) | <b>1a</b> (y mmol) | <b>HE</b> (z mmol) | yield <sup>b</sup> | <i>ee</i> <sup>c</sup> | <i>rr</i> <sup>b</sup> |
|-------|--------------------|--------------------|--------------------|--------------------|------------------------|------------------------|
| 1     | 0.1                | 0.15               | 0.2                | 53%                | 96%                    | 93:7                   |
| 2     | 0.1                | 0.2                | 0.2                | 58%                | 96%                    | 95:5                   |
| 3     | 0.1                | 0.2                | 0.3                | 64%                | 96%                    | 95:5                   |
| 4     | 0.1                | 0.3                | 0.2                | 63%                | 96%                    | >95:5                  |
| 5     | 0.1                | 0.3                | 0.3                | 60%                | 96%                    | >95:5                  |
| 6     | 0.2                | 0.1                | 0.2                | 56%                | 96%                    | >95:5                  |
| 7     | 0.2                | 0.1                | 0.3                | 63%                | 96%                    | >95:5                  |
| 8     | 0.3                | 0.1                | 0.2                | 70%                | 96%                    | >95:5                  |
| 9     | 0.3                | 0.1                | 0.3                | 66%                | 96%                    | >95:5                  |

<sup>a</sup>Reaction conditions: **1a**, **2a**, **HE**, Cs<sub>2</sub>CO<sub>3</sub>, Pd<sub>2</sub>(dba)<sub>3</sub> (2.5 mol %), ligand (6 mol %), and Ir(ppy)<sub>2</sub>(dtbbpy)PF<sub>6</sub> (2 mol %) in MeCN (4.0 mL) was irradiated by 45 W blue LEDs for 12 h. <sup>b</sup>The yield and regioselectivity (*rr*) were determined by GC. <sup>c</sup>Enantiomeric excess (*ee*) values determined by HPLC on a chiral stationary phase. PMP = *para*-methoxyphenyl.

## 7. Proof of stereochemistry

In our previous work<sup>4</sup>, we described photoredox/Pd-cocatalyzed enantioselective coupling of allyl esters with 4-alkyl-1,4-dihydropyridines. The (*R*)-configuration of the product was established unambiguously by single crystal X-ray diffraction analysis (**Figure S1a**). When **1a** was alkylated with 4-alkyl-1,4-dihydropyridines **6** under the same conditions, the absolute configuration of (*S*)-**3w** was also assigned as “*S*” based on the assumption that the two reactions proceed through a similar pathway (**Figure S1b**).

### a) our previous work:

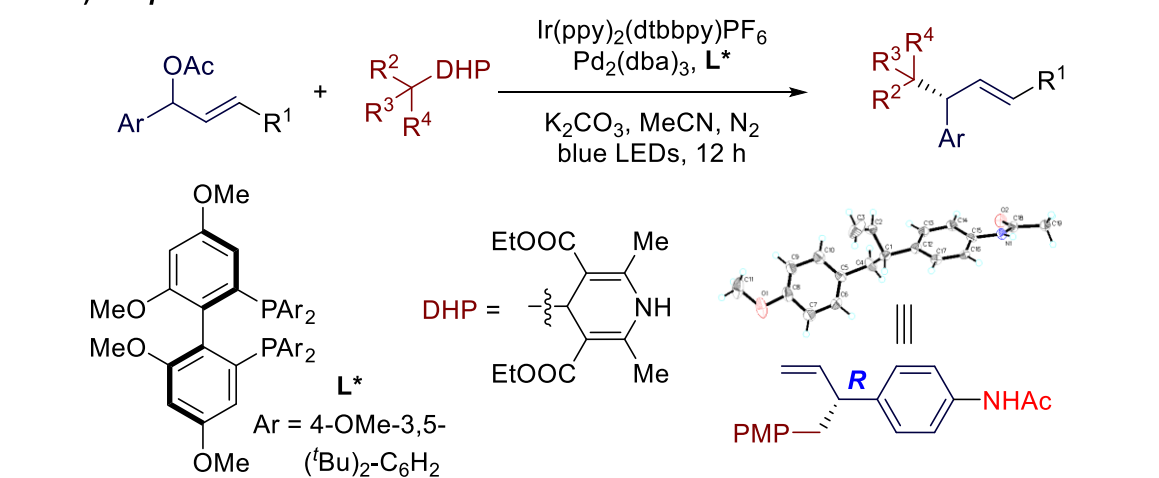

### b) Synthesis of (*S*)-**3w** using our previous method:

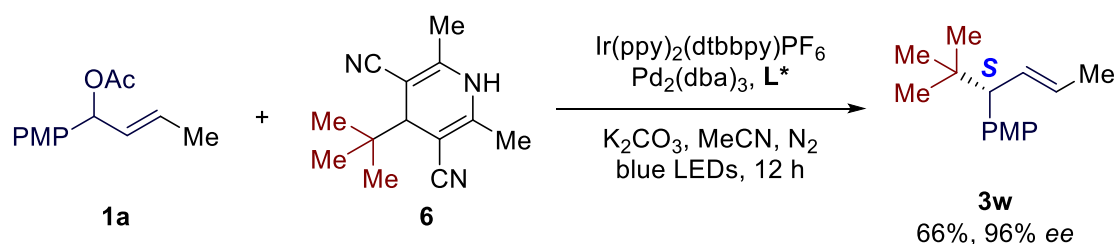

**Figure S1.** Synthesis of (*R*)-**3w** using our previous method.

The enantioselectivity of (*S*)-**3w** (96% ee) synthesized according to our previous methods could be determined by the HPLC analysis (Daicel Chiralpak OD-H, hexane/ethanol = 100/0, flow rate 1.0 mL/min, T = 25 °C, 220 nm). As shown in **Figure S2**, the retention time of (*S*)-**3w** under this HPLC conditions is 7.83 min, and the retention time of (*R*)-**3w** is 11.59 min.

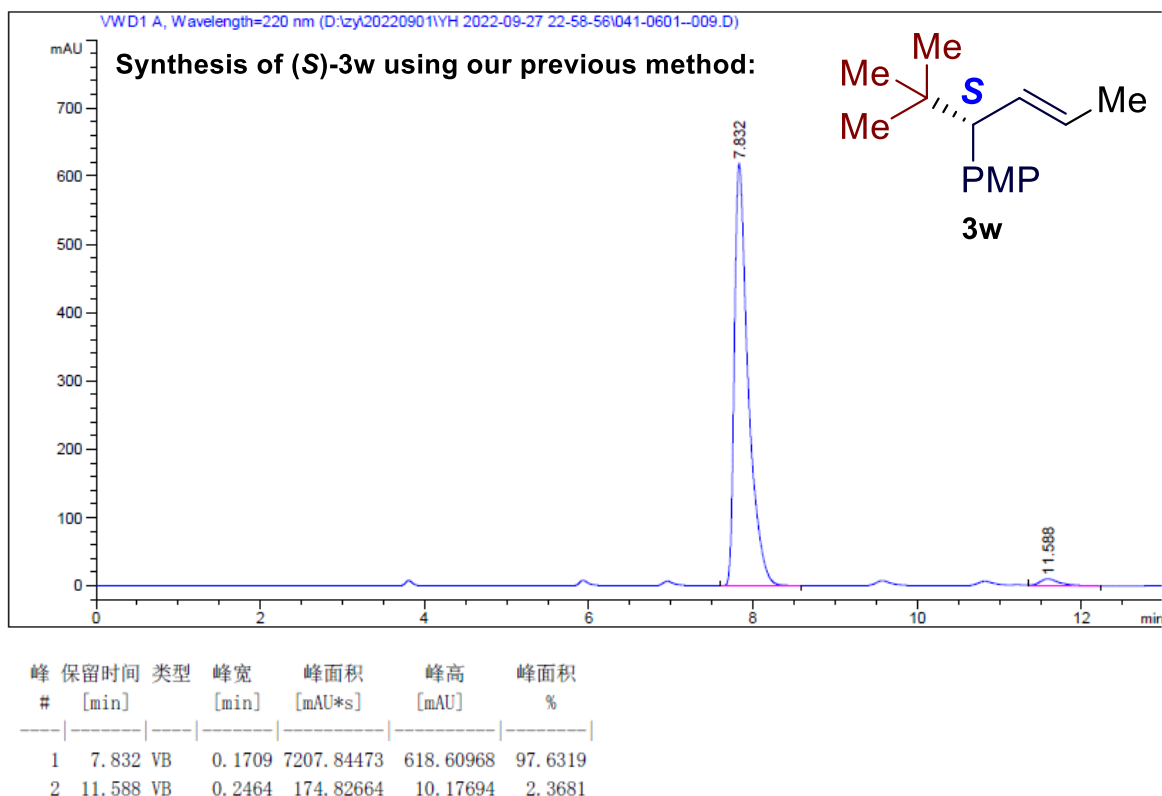

**Figure S2.** The HPLC spectrum of (S)-3w. HPLC conditions: Daicel Chiralpak OD-H, hexane/isopropanol = 100/0, flow rate 1.0 mL/min, T = 25 °C, 220 nm.

3w was synthesized under the standard conditions of this work (Figure S3), and its enantioselectivity was determined under the same HPLC conditions (Daicel Chiralpak OD-H, hexane/ethanol = 100/0, flow rate 1.0 mL/min, T = 25 °C, 220 nm).

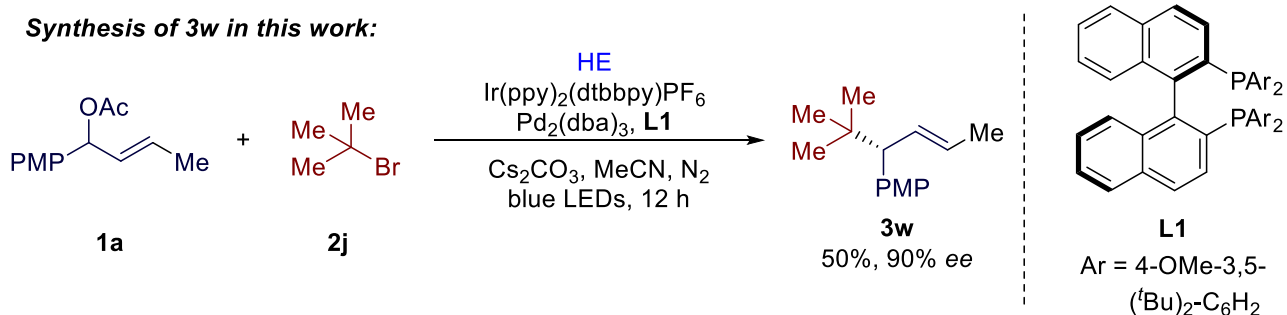

**Figure S3.** Synthesis of 3w in this work.



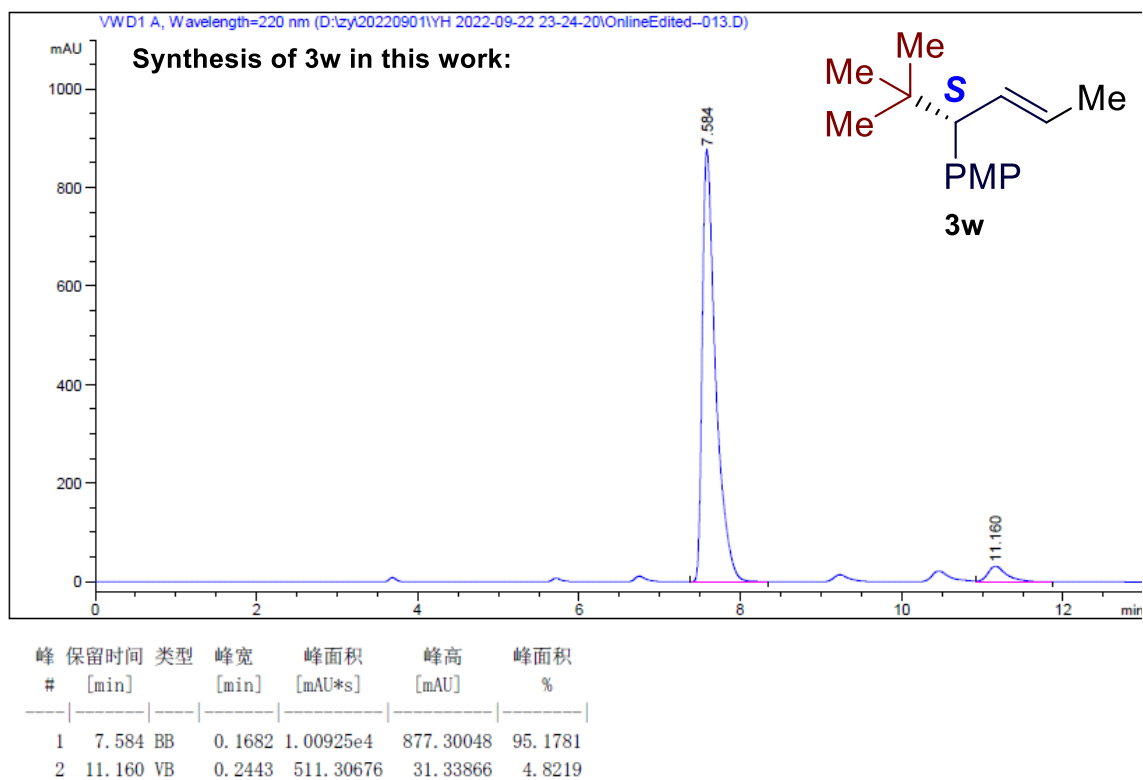

**Figure S4.** The HPLC spectrum of **3w** in this work. HPLC conditions: Daicel Chiralpak OD-H, hexane/isopropanol = 100/0, flow rate 1.0 mL/min, T = 25 °C, 220 nm.

## 8. Mechanism Study

### Radical Trapping Experiment with TEMPO

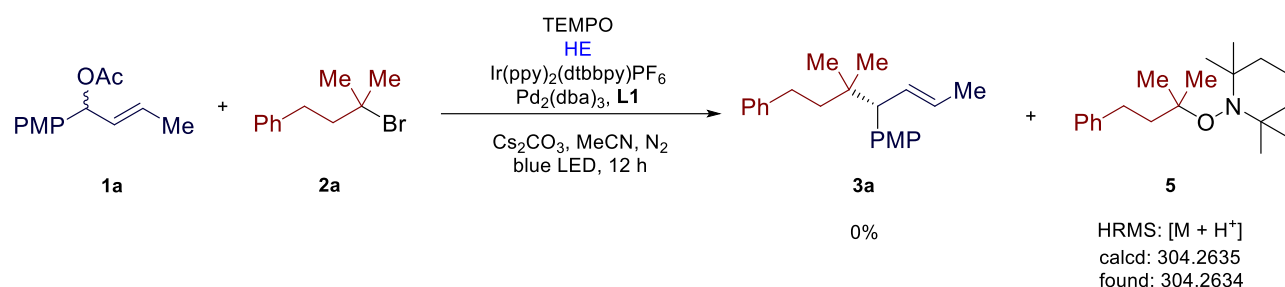

### Procedure C

In a nitrogen-filled glovebox, an 8 mL screw-cap test tube, equipped with a magnetic stir bar, charged with Pd<sub>2</sub>(dba)<sub>3</sub> (2.3 mg, 0.0025 mmol, 2.5 mol%), (*R*)-2,2'-bis((3,5-di-*tert*-butyl-4-methoxyphenyl)-λ<sup>2</sup>-phosphaneyl)-1,1'-binaphthalene (**L1**) (7.4 mg, 0.006 mmol, 6 mol%), anhydrous MeCN (2.0 mL) was added and the mixture was stirred for 30 min. Then the following chemicals were added in turn: Ir(ppy)<sub>2</sub>(dtbbpy)PF<sub>6</sub> (2.0 mg, 0.002 mmol, 2.0 mol%), Cs<sub>2</sub>CO<sub>3</sub> (65.2 mg, 0.2 mmol, 2.0 equiv), HE (50.7 mg, 0.2 mmol, 2.0 equiv), allylic acetates **1a** (0.1 mmol, 1.0 equiv), alkyl bromides **2a** (0.3 mmol, 3.0 equiv), TEMPO (46.9 mg, 0.3 mmol, 3.0 equiv) and anhydrous MeCN (2.0 mL). The reaction tube was sealed with a Teflon screw cap, removed from the glove box. The reaction mixture was stirred vigorously under 45W blue LED lights at room temperature for 12h. Next, the reaction mixture was transferred to a 250 mL separatory funnel, rinsed/diluted with 100 mL ether, and washed with 100 mL deionized water (twice) and finally 100 mL brine. The organic phase was concentrated under vacuum to afford a residue. The HRMS of the crude reaction mixture did not show the formation of product **3a**, while a TEMPO-alkyl adduct **5** was observed.

### Stern-Volmer fluorescence quenching experiments

A Hitachi F-7000 fluorescence spectrometer was used to record the emission intensities. All  $\text{Ir}(\text{ppy})_2(\text{dtbbpy})\text{PF}_6$  solutions were excited at 410 nm and the emission intensity at 572 nm was observed. MeCN was degassed with a stream of Ar for 30 min. In a typical experiment, the emission spectrum of a  $2 \times 10^{-5}$  M solution of  $\text{Ir}(\text{ppy})_2(\text{dtbbpy})\text{PF}_6$  in MeCN was collected. Then, appropriate amount of quencher was added to the measured solution in a quartz cuvette and the emission spectrum of the sample was collected.  $I_0$  and  $I$  represent the intensities of the emission in the absence and presence of the quencher at 572 nm.

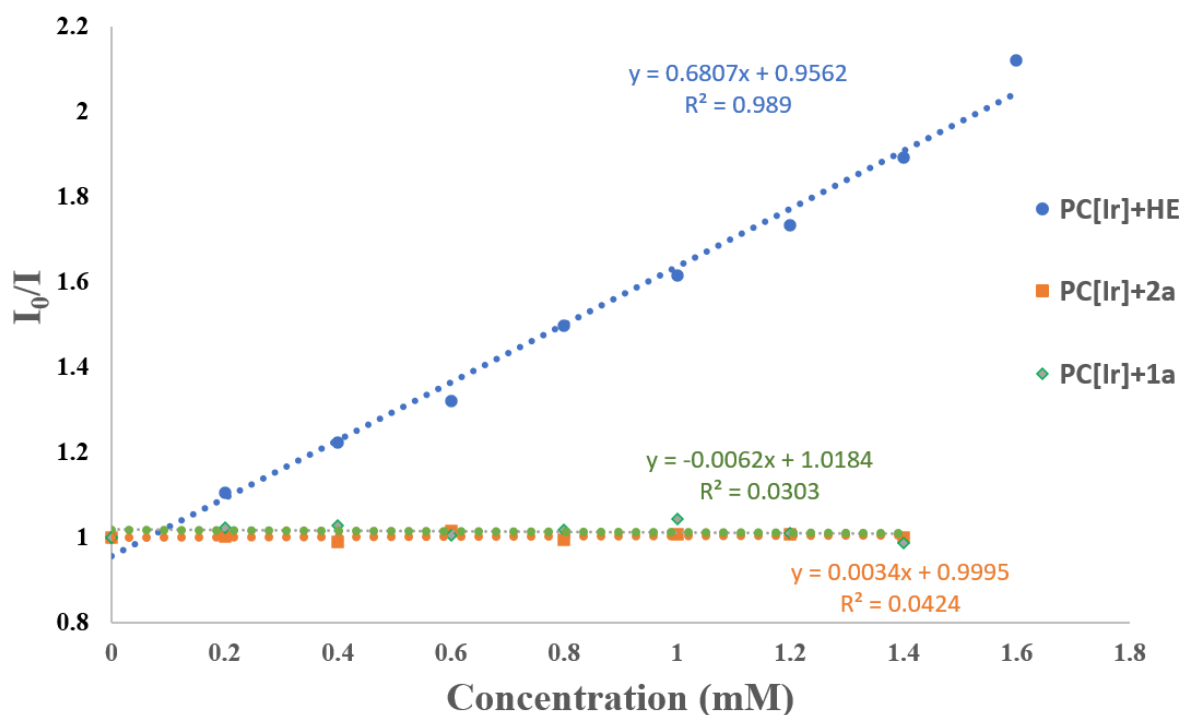

**Figure S5.** The Stern–Volmer plot.

Stern–Volmer quenching experiments indicate that HE quenches photoexcited catalyst.

### Excited-state palladium catalysis pathway

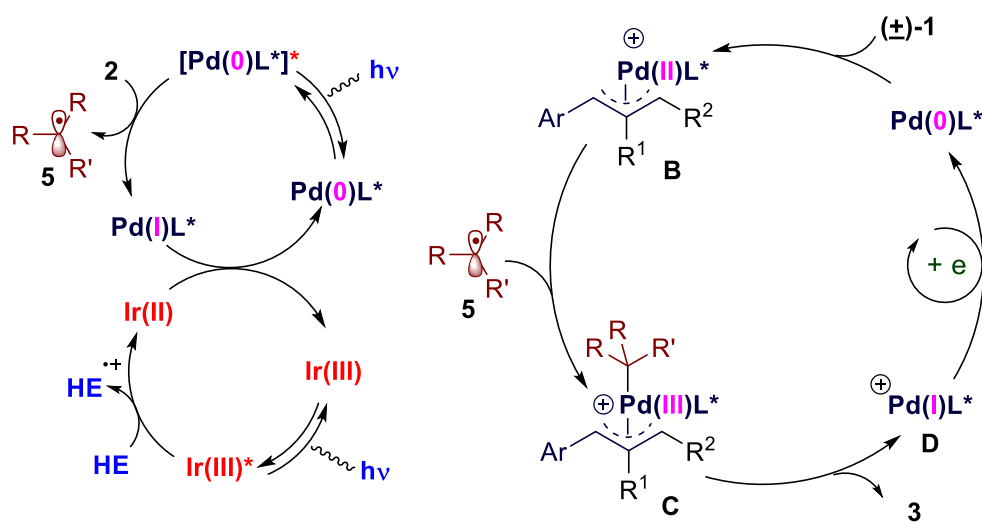

**Figure S6.** Proposed mechanisms for excited-state palladium catalysis pathway.

## 9. Product characterization

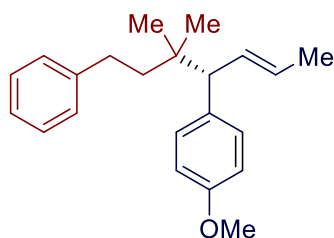

**3a**

**(*S,E*)-1-(5,5-dimethyl-7-phenylhept-2-en-4-yl)-4-methoxybenzene (3a):** According to *General Procedure B* Flash column chromatography eluent, petroleum ether/ethyl acetate = 100:0 to 100:1; Reaction time = 12 h; yield: 70% (21.6 mg); > 95:5 *rr*; > 95:5 *E:Z*; a colourless sticky oil;  $[\alpha]_{\text{D}}^{20} = -18.4$  (c 0.55,  $\text{CHCl}_3$ );  $^1\text{H NMR}$  (400 MHz,  $\text{CDCl}_3$ )  $\delta$  7.28 – 7.23 (m, 2H), 7.18 – 7.08 (m, 5H), 6.83 – 6.79 (m, 2H), 5.86 (m, 1H), 5.48 (m, 1H), 3.78 (s, 3H), 3.11 (d,  $J = 9.9$  Hz, 1H), 2.62 – 2.54 (m, 2H), 1.68 (m, 3H), 1.53 – 1.43 (m, 2H), 0.92 (s, 3H), 0.88 (s, 3H);  $^{13}\text{C NMR}$  (100 MHz,  $\text{CDCl}_3$ )  $\delta$  157.76, 143.54, 135.23, 131.32, 130.17, 128.36, 128.29, 126.55, 125.51, 113.18, 57.66, 55.20, 43.03, 36.60, 30.49, 25.06, 24.75, 18.15; HRMS (ESI)  $m/z$ :  $[\text{M}+\text{Na}]^+$  Calcd for  $\text{C}_{22}\text{H}_{28}\text{NaO}$  requires  $m/z$  331.2032; found  $m/z$  331.2023; Enantiomeric ratio: 98:2, determined by HPLC (Daicel Chiralpak OD-H, hexane/isopropanol = 100/0, flow rate 1.0 mL/min,  $T = 25$  °C, 220 nm):  $t_{\text{R}} = 18.29$  min (major),  $t_{\text{R}} = 43.53$  min (minor). ( $\pm$ )-**3a**: According to *General Procedure A*.

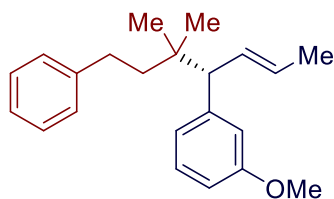

**3b**

**(*S,E*)-1-(5,5-dimethyl-7-phenylhept-2-en-4-yl)-3-methoxybenzene (3b):** According to *General Procedure B* Flash column chromatography eluent, petroleum ether/ethyl acetate = 100:0 to 100:1; Reaction time = 12 h; yield: 63% (19.4 mg); > 95:5 *rr*; > 95:5 *E:Z*; a colourless sticky oil;  $[\alpha]_{\text{D}}^{20} = -15.8$  (c 0.44,  $\text{CHCl}_3$ );  $^1\text{H NMR}$  (400 MHz,  $\text{CDCl}_3$ )  $\delta$  7.28 – 7.23 (m, 2H), 7.21 – 7.09 (m, 4H), 6.80 – 6.71 (m, 3H), 5.87 (m, 1H), 5.50 (m, 1H), 3.79 (s, 3H), 3.13 (d,  $J = 9.9$  Hz, 1H), 2.58 (t,  $J = 8.8$  Hz, 2H), 1.69 (m, 3H), 1.58 – 1.44 (m, 2H), 0.95 (s, 3H), 0.91 (s, 3H);  $^{13}\text{C NMR}$  (100 MHz,  $\text{CDCl}_3$ )  $\delta$  159.04, 144.74, 143.47, 130.98, 128.60, 128.36, 128.29, 126.89, 125.52, 121.98, 115.64, 110.76,

58.56, 55.14, 43.13, 36.61, 30.48, 25.19, 24.83, 18.15.; HRMS (ESI)  $m/z$ :  $[M+Na]^+$  Calcd for  $C_{22}H_{28}NaO$  requires  $m/z$  331.2032; found  $m/z$  331.2025; Enantiomeric ratio: 96:4, determined by HPLC (Daicel Chiralpak OD-H, hexane/isopropanol = 100/0, flow rate 1.0 mL/min,  $T = 25\text{ }^\circ\text{C}$ , 220 nm):  $t_R = 14.58$  min (major),  $t_R = 29.12$  min (minor). ( $\pm$ )-**3b**: According to *General Procedure A*.

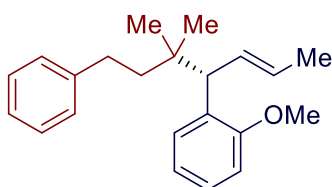

**3c**

**(*S,E*)-1-(5,5-dimethyl-7-phenylhept-2-en-4-yl)-2-methoxybenzene (3c)**: According to *General Procedure B* Flash column chromatography eluent, petroleum ether/ethyl acetate = 100:0 to 100:1; Reaction time = 12 h; yield: 68% (21.0 mg); > 95:5 *rr*; > 95:5 *E:Z*; a colourless sticky oil;  $[\alpha]_D^{20} = -17.0$  (c 0.39,  $CHCl_3$ );  $^1H$  NMR (400 MHz,  $CDCl_3$ )  $\delta$  7.28 – 7.23 (m, 2H), 7.21 (m, 2H), 7.18 – 7.11 (m, 3H), 6.93 – 6.82 (m, 2H), 5.93 – 5.79 (m, 1H), 5.50 (m, 1H), 3.90 (d,  $J = 9.9$  Hz, 1H), 3.78 (s, 3H), 2.65 – 2.55 (m, 2H), 1.67 (m, 3H), 1.55 (m, 2H), 0.94 (s, 3H), 0.87 (s, 3H);  $^{13}C$  NMR (100 MHz,  $CDCl_3$ )  $\delta$  157.09, 143.87, 131.88, 131.56, 129.78, 128.37, 128.23, 126.58, 125.39, 119.92, 110.68, 55.37, 42.94, 37.22, 30.54, 29.72, 24.59, 18.15; HRMS (ESI)  $m/z$ :  $[M+Na]^+$  Calcd for  $C_{22}H_{28}NaO$  requires  $m/z$  331.2032; found  $m/z$  331.2027; Enantiomeric ratio: 97:3, determined by HPLC (Daicel Chiralpak OD-H, hexane/isopropanol = 100/0, flow rate 1.0 mL/min,  $T = 25\text{ }^\circ\text{C}$ , 220 nm):  $t_R = 8.26$  min (major),  $t_R = 12.35$  min (minor). ( $\pm$ )-**3c**: According to *General Procedure A*.

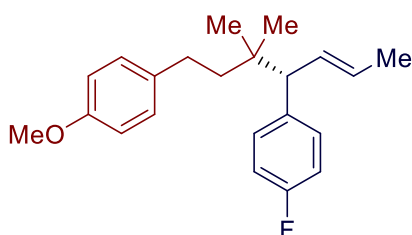

**3d**

**(*S,E*)-1-fluoro-4-(7-(4-methoxyphenyl)-5,5-dimethylhept-2-en-4-yl)benzene (3d)**: According to *General Procedure B* Flash column chromatography eluent, petroleum ether/ethyl acetate = 100:0 to 100:1; Reaction time = 12 h; yield: 54% (17.6 mg); > 95:5 *rr*; > 95:5 *E:Z*; a colourless sticky oil;  $[\alpha]_D^{20} = -10.2$  (c 0.33,  $CHCl_3$ );  $^1H$  NMR (400 MHz,  $CDCl_3$ )  $\delta$  7.16 – 7.10 (m, 2H), 7.07 – 7.01 (m, 2H), 6.99 – 6.91 (m, 2H), 6.84 – 6.79 (m, 2H), 5.85 (m, 1H), 5.49 (m, 1H), 3.78 (s, 3H), 3.14 (d,  $J =$

9.8 Hz, 1H), 2.56 – 2.45 (m, 2H), 1.69 (m, 3H), 1.53 – 1.40 (m, 2H), 0.91 (s, 3H), 0.87 (s, 3H);  $^{13}\text{C}$  NMR (100 MHz,  $\text{CDCl}_3$ )  $\delta$  161.25 (d,  $J = 243.7$  Hz), 157.61, 138.74 (d,  $J = 3.4$  Hz), 135.37, 130.90, 130.57 (d,  $J = 7.7$  Hz), 129.15, 127.06, 114.48 (d,  $J = 20.9$  Hz), 113.76, 57.74, 55.26, 43.20, 36.51, 29.46, 24.99, 24.66, 18.14.;  $^{19}\text{F}$  NMR (376 MHz,  $\text{CDCl}_3$ )  $\delta$  -117.71; HRMS (ESI)  $m/z$ :  $[\text{M}+\text{Na}]^+$  Calcd for  $\text{C}_{22}\text{H}_{27}\text{FNaO}$  requires  $m/z$  349.1938; found  $m/z$  349.1927; Enantiomeric ratio: 96:4, determined by HPLC (Daicel Chiralpak OJ-H, hexane/ethanol = 99/1, flow rate 1.0 mL/min,  $T = 25$  °C, 220 nm):  $t_{\text{R}} = 21.87$  min (major),  $t_{\text{R}} = 20.21$  min (minor). ( $\pm$ )-**3d**: According to **General Procedure A**.

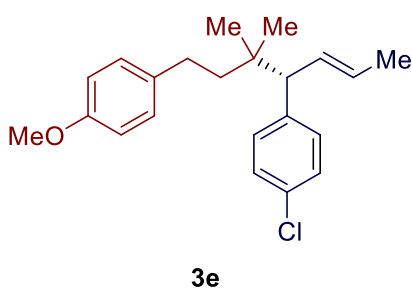

**(S,E)-1-chloro-4-(7-(4-methoxyphenyl)-5,5-dimethylhept-2-en-4-yl)benzene (3e)**: According to **General Procedure B** Flash column chromatography eluent, petroleum ether/ethyl acetate = 100;0 to 100:1; Reaction time = 12 h; yield: 51% (17.5 mg); > 95:5 *rr*; > 95:5 *E:Z*; a colourless sticky oil;  $[\alpha]_{\text{D}}^{20} = -12.2$  (c 0.34,  $\text{CHCl}_3$ );  $^1\text{H}$  NMR (400 MHz,  $\text{CDCl}_3$ )  $\delta$  7.27 – 7.20 (m, 2H), 7.12 – 7.08 (m, 2H), 7.06 – 7.01 (m, 2H), 6.84 – 6.79 (m, 2H), 5.84 (m, 1H), 5.49 (m, 1H), 3.78 (s, 3H), 3.12 (d,  $J = 9.8$  Hz, 1H), 2.56 – 2.46 (m, 2H), 1.69 (dd,  $J = 6.4, 1.5$  Hz, 3H), 1.53 – 1.40 (m, 2H), 0.91 (s, 3H), 0.87 (s, 3H);  $^{13}\text{C}$  NMR (100 MHz,  $\text{CDCl}_3$ )  $\delta$  157.62, 141.60, 135.31, 131.62, 130.63, 130.59, 129.15, 127.85, 127.34, 113.78, 57.94, 55.27, 43.18, 36.53, 29.45, 24.97, 24.65, 18.13; HRMS (ESI)  $m/z$ :  $[\text{M}+\text{Na}]^+$  Calcd for  $\text{C}_{22}\text{H}_{27}\text{ClNaO}$  requires  $m/z$  365.1643, found  $m/z$  365.1638; Enantiomeric ratio: 97:3, determined by HPLC (Daicel Chiralpak OD-H, hexane/isopropanol = 99.7/0.3, flow rate 1.0 mL/min,  $T = 25$  °C, 220 nm):  $t_{\text{R}} = 45.04$  min (major),  $t_{\text{R}} = 35.85$  min (minor). ( $\pm$ )-**3e**: According to **General Procedure A**.

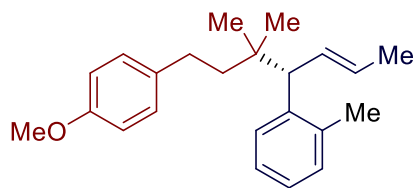

**3f**

**(*S,E*)-1-(7-(4-methoxyphenyl)-5,5-dimethylhept-2-en-4-yl)-2-methylbenzene (3f):** According to **General Procedure B** Flash column chromatography eluent, petroleum ether/ethyl acetate = 100:0 to 100:1; Reaction time = 12 h; yield: 57% (18.4 mg); > 95:5 *rr*; > 95:5 *E:Z*; a colourless sticky oil;  $[\alpha]_D^{20} = -16.6$  (c 0.41,  $\text{CHCl}_3$ );  $^1\text{H NMR}$  (400 MHz,  $\text{CDCl}_3$ )  $\delta$  7.24 (dd,  $J = 8.2, 1.5$  Hz, 1H), 7.16 – 7.11 (m, 2H), 7.09 – 7.03 (m, 3H), 6.83 – 6.79 (m, 2H), 5.81 (m, 1H), 5.50 – 5.40 (m, 1H), 3.78 (s, 3H), 3.53 (d,  $J = 9.6$  Hz, 1H), 2.58 – 2.47 (m, 2H), 2.36 (s, 3H), 1.66 (m, 3H), 1.60 – 1.55 (m, 2H), 0.99 (s, 3H), 0.89 (s, 3H);  $^{13}\text{C NMR}$  (100 MHz,  $\text{CDCl}_3$ )  $\delta$  157.58, 141.77, 136.12, 135.54, 132.03, 130.51, 129.18, 128.69, 126.41, 125.47, 125.30, 113.75, 55.27, 52.23, 43.46, 37.71, 29.59, 24.70, 24.48, 20.94, 18.14; HRMS (ESI)  $m/z$ :  $[\text{M}+\text{Na}]^+$  Calcd for  $\text{C}_{23}\text{H}_{30}\text{NaO}$  requires  $m/z$  345.2189, found  $m/z$  345.2181; Enantiomeric ratio: 94:6, determined by HPLC (Daicel Chiralpak OD-H, hexane/isopropanol = 99.5/0.5, flow rate 1.0 mL/min,  $T = 25$  °C, 220 nm):  $t_R = 9.51$  min (major),  $t_R = 8.88$  min (minor). ( $\pm$ )-**3f**: According to **General Procedure A**.

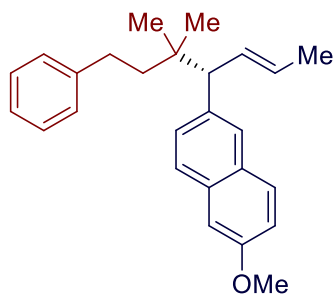

**3g**

**(*S,E*)-2-(5,5-dimethyl-7-phenylhept-2-en-4-yl)-6-methoxynaphthalene (3g):** According to **General Procedure B** Flash column chromatography eluent, petroleum ether/ethyl acetate = 100:0 to 100:1; Reaction time = 12 h; yield: 34% (12.2 mg); > 95:5 *rr*; > 95:5 *E:Z*; a colourless sticky oil;  $[\alpha]_D^{20} = -17.0$  (c 0.27,  $\text{CHCl}_3$ );  $^1\text{H NMR}$  (400 MHz,  $\text{CDCl}_3$ )  $\delta$  7.66 (m, 2H), 7.54 (m, 1H), 7.31 (m, 1H), 7.28 – 7.22 (m, 2H), 7.19 – 7.07 (m, 5H), 6.05 – 5.95 (m, 1H), 5.59 – 5.48 (m, 1H), 3.90 (s, 3H), 3.30 (d,  $J = 9.8$  Hz, 1H), 2.61 (m, 2H), 1.70 (m, 3H), 1.62 – 1.50 (m, 2H), 0.99 (s, 3H), 0.94 (s, 3H);  $^{13}\text{C NMR}$  (100 MHz,  $\text{CDCl}_3$ )  $\delta$  157.21, 143.49, 138.42, 133.05, 131.16, 129.20, 128.67,



128.37, 128.30, 127.52, 126.96, 125.93, 125.52, 118.55, 105.46, 58.39, 55.31, 43.17, 36.89, 30.53, 25.22, 24.88, 18.19; HRMS (ESI)  $m/z$ :  $[M+Na]^+$  Calcd for  $C_{26}H_{30}NaO$  requires  $m/z$  381.2189, found  $m/z$  381.2182; Enantiomeric ratio: 91:9, determined by HPLC (Daicel Chiralpak OD-H, hexane/isopropanol = 99.5/0.5, flow rate 0.8 mL/min,  $T = 25\text{ }^\circ\text{C}$ , 220 nm):  $t_R = 7.82$  min (major),  $t_R = 8.49$  min (minor). ( $\pm$ )-**3g**: According to *General Procedure A*.

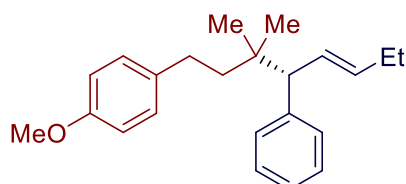

**3h**

**(*S,E*)-1-(3,3-dimethyl-4-phenyloct-5-en-1-yl)-4-methoxybenzene (3h)**: According to *General Procedure B* Flash column chromatography eluent, petroleum ether/ethyl acetate = 100:0 to 100:1; Reaction time = 12 h; yield: 60% (19.4 mg); > 95:5 *rr*; > 95:5 *E:Z*; a colourless sticky oil;  $[\alpha]_D^{20} = -18.1$  ( $c$  0.48,  $CHCl_3$ );  $^1H$  NMR (400 MHz,  $CDCl_3$ )  $\delta$  7.28 – 7.24 (m, 2H), 7.20 – 7.15 (m, 4H), 6.79 – 6.65 (m, 3H), 5.87 (m, 1H), 5.54 (m, 1H), 3.78 (s, 3H), 3.16 (d,  $J = 9.9$  Hz, 1H), 2.57 (m, 2H), 2.10 – 1.99 (m, 2H), 1.57 – 1.43 (m, 2H), 0.98 (t,  $J = 7.4$  Hz, 3H), 0.94 (s, 3H), 0.89 (s, 3H);  $^{13}C$  NMR (100 MHz,  $CDCl_3$ )  $\delta$  159.60, 145.17, 143.14, 134.06, 129.41, 129.22, 128.79, 127.72, 125.88, 120.80, 114.13, 110.82, 58.25, 55.12, 42.93, 36.60, 30.53, 25.77, 25.17, 24.87, 13.90; HRMS (ESI)  $m/z$ :  $[M+Na]^+$  Calcd for  $C_{23}H_{30}NaO$  requires  $m/z$  345.2189, found  $m/z$  345.2182; Enantiomeric ratio: 97:3, determined by HPLC (Daicel Chiralpak OJ-H, hexane/ethanol = 99/1, flow rate 1.0 mL/min,  $T = 25\text{ }^\circ\text{C}$ , 220 nm):  $t_R = 18.55$  min (major),  $t_R = 14.86$  min (minor). ( $\pm$ )-**3h**: According to *General Procedure A*.

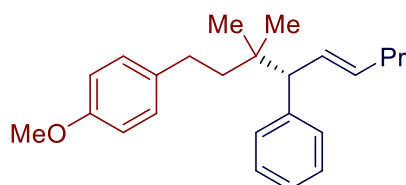

**3i**

**(*S,E*)-1-(3,3-dimethyl-4-phenylnon-5-en-1-yl)-4-methoxybenzene (3i)**: According to *General Procedure B* Flash column chromatography eluent, petroleum ether/ethyl acetate = 100:0 to 100:1; Reaction time = 12 h; yield: 54% (18.2 mg); > 95:5 *rr*; > 95:5 *E:Z*; a colourless sticky oil;  $[\alpha]_D^{20} = -$

13.7 (c 0.45, CHCl<sub>3</sub>); <sup>1</sup>H NMR (400 MHz, CDCl<sub>3</sub>) δ 7.28 – 7.23 (m, 2H), 7.20 – 7.14 (m, 3H), 7.07 – 7.02 (m, 2H), 6.83 – 6.78 (m, 2H), 5.88 (m, 1H), 5.48 (m, 1H), 3.78 (s, 3H), 3.15 (d, *J* = 9.9 Hz, 1H), 2.53 (m, 2H), 2.05 – 1.94 (m, 2H), 1.55 – 1.44 (m, 2H), 1.38 (m, 2H), 0.93 (s, 3H), 0.90 – 0.84 (m, 6H); <sup>13</sup>C NMR (100 MHz, CDCl<sub>3</sub>) δ 157.56, 143.20, 135.52, 132.30, 130.05, 129.40, 129.16, 127.68, 125.83, 113.72, 58.37, 55.26, 43.26, 36.56, 34.88, 29.48, 25.14, 24.87, 22.64, 13.77; HRMS (ESI) *m/z*: [M+Na]<sup>+</sup> Calcd for C<sub>24</sub>H<sub>32</sub>NaO requires *m/z* 359.2345, found *m/z* 359.2338; Enantiomeric ratio: 97:3, determined by HPLC (Daicel Chiralpak OJ-H, hexane/ethanol = 99/1, flow rate 0.5 mL/min, T = 25 °C, 220 nm): t<sub>R</sub> = 16.25 min (major), t<sub>R</sub> = 14.06 min (minor). (±)-**3i**: According to *General Procedure A*.

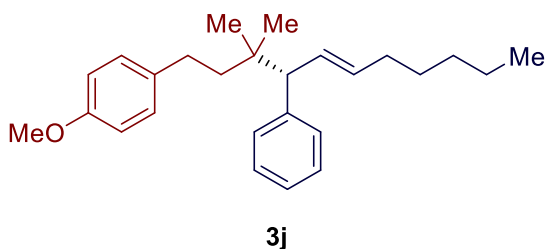

(*S,E*)-1-(3,3-dimethyl-4-phenylundec-5-en-1-yl)-4-methoxybenzene (**3j**): According to *General Procedure B* Flash column chromatography eluent, petroleum ether/ethyl acetate = 100:0 to 100:1; Reaction time = 12 h; yield: 62% (20.7 mg); > 95:5 *rr*; > 95:5 *E:Z*; a colourless sticky oil; [α]<sub>D</sub><sup>20</sup> = -13.1 (c 0.38, CHCl<sub>3</sub>); <sup>1</sup>H NMR (400 MHz, CDCl<sub>3</sub>) δ 7.28 – 7.23 (m, 2H), 7.20 – 7.15 (m, 3H), 7.07 – 7.02 (m, 2H), 6.83 – 6.77 (m, 2H), 5.87 (m, 1H), 5.48 (m, 1H), 3.77 (s, 3H), 3.15 (d, *J* = 9.9 Hz, 1H), 2.53 (m, 2H), 2.05 – 1.98 (m, 2H), 1.55 – 1.43 (m, 2H), 1.39 – 1.32 (m, 2H), 1.26 (m, 4H), 0.93 (s, 3H), 0.88 (s, 3H), 0.86 (t, *J* = 7.0 Hz, 3H); <sup>13</sup>C NMR (100 MHz, CDCl<sub>3</sub>) δ 157.57, 143.20, 135.53, 132.54, 129.83, 129.41, 129.16, 127.68, 125.83, 113.72, 58.35, 55.26, 43.29, 36.56, 32.74, 31.44, 29.48, 29.19, 25.16, 24.82, 22.52, 14.07; HRMS (ESI) *m/z*: [M+Na]<sup>+</sup> Calcd for C<sub>26</sub>H<sub>36</sub>NaO requires *m/z* 387.2658, found *m/z* 387.2652; Enantiomeric ratio: 97:3, determined by HPLC (Daicel Chiralpak OD-H, hexane/isopropanol = 100/0, flow rate 1.0 mL/min, T = 25 °C, 220 nm): t<sub>R</sub> = 13.22 min (major), t<sub>R</sub> = 17.18 min (minor). (±)-**3j**: According to *General Procedure A*.

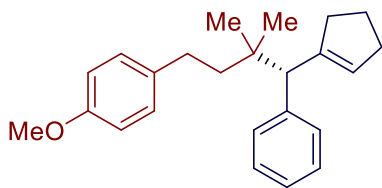

**3k**

**(R)-1-(4-(cyclopent-1-en-1-yl)-3,3-dimethyl-4-phenylbutyl)-4-methoxybenzene (3k):** According to *General Procedure B* Flash column chromatography eluent, petroleum ether/ethyl acetate = 100:0 to 100:1; Reaction time = 12 h; yield: 54% (18.0 mg); > 95:5 *rr*; a colourless sticky oil;  $[\alpha]_{\text{D}}^{20} = -11.0$  (c 0.22,  $\text{CHCl}_3$ );  $^1\text{H NMR}$  (400 MHz,  $\text{CDCl}_3$ )  $\delta$  7.33 – 7.20 (m, 5H), 7.03 (m, 2H), 6.84 – 6.75 (m, 2H), 5.77 – 5.57 (m, 1H), 3.77 (s, 3H), 3.39 (s, 1H), 2.59 – 2.47 (m, 2H), 2.36 – 2.26 (m, 4H), 1.82 – 1.73 (m, 2H), 1.72 – 1.61 (m, 2H), 1.52 (m, 2H), 1.04 (s, 3H), 0.96 (s, 3H);  $^{13}\text{C NMR}$  (100 MHz,  $\text{CDCl}_3$ )  $\delta$  157.56, 144.55, 141.84, 135.54, 130.19, 129.17, 127.57, 126.37, 125.97, 113.74, 57.60, 55.26, 44.06, 37.43, 32.75, 29.76, 26.35, 25.57, 23.23; HRMS (ESI)  $m/z$ :  $[\text{M}+\text{Na}]^+$  Calcd for  $\text{C}_{24}\text{H}_{30}\text{NaO}$  requires  $m/z$  357.2189, found  $m/z$  357.2183; Enantiomeric ratio: 84:16, determined by HPLC (Daicel Chiralpak OD-H, hexane/isopropanol = 99.9/0.1, flow rate 1.0 mL/min,  $T = 25$  °C, 220 nm):  $t_{\text{R}} = 14.61$  min (major),  $t_{\text{R}} = 12.73$  min (minor). ( $\pm$ )-**3k**: According to *General Procedure A*.

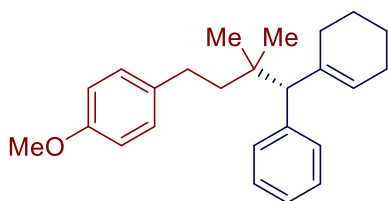

**3l**

**(R)-1-(4-(cyclohex-1-en-1-yl)-3,3-dimethyl-4-phenylbutyl)-4-methoxybenzene (3l):** According to *General Procedure B* Flash column chromatography eluent, petroleum ether/ethyl acetate = 100:1 to 50:1; Reaction time = 12 h; yield: 45% (15.7 mg); > 95:5 *rr*; a colourless sticky oil;  $[\alpha]_{\text{D}}^{20} = -9.5$  (c 0.27,  $\text{CHCl}_3$ );  $^1\text{H NMR}$  (400 MHz,  $\text{CDCl}_3$ )  $\delta$  7.29 (m, 3H), 7.24 – 7.18 (m, 2H), 7.05 – 6.99 (m, 2H), 6.83 – 6.78 (m, 2H), 5.91 – 5.79 (m, 1H), 3.78 (s, 3H), 3.06 (s, 1H), 2.52 (m, 2H), 2.12 – 2.04 (m, 2H), 2.01 – 1.94 (m, 2H), 1.74 – 1.66 (m, 2H), 1.56 – 1.47 (m, 4H), 1.05 (s, 3H), 0.98 (s, 3H);  $^{13}\text{C NMR}$  (100 MHz,  $\text{CDCl}_3$ )  $\delta$  157.53, 142.32, 138.44, 135.64, 130.32, 129.16, 127.49, 125.86, 123.90, 113.72, 62.75, 55.26, 44.45, 37.29, 30.53, 29.80, 27.07, 26.10, 25.60, 23.43,

22.30; HRMS (ESI)  $m/z$ :  $[M+Na]^+$  Calcd for  $C_{25}H_{32}NaO$  requires  $m/z$  371.2345, found  $m/z$  371.2337; Enantiomeric ratio: 82:18, determined by HPLC (Daicel Chiralpak OD-H, hexane/isopropanol = 100/0, flow rate 0.5 mL/min,  $T = 25\text{ }^\circ\text{C}$ , 220 nm):  $t_R = 29.20$  min (major),  $t_R = 27.47$  min (minor). ( $\pm$ )-**3l**: According to *General Procedure A*.

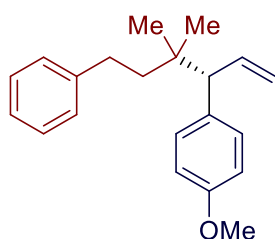

**3m**

**(S)-1-(4,4-dimethyl-6-phenylhex-1-en-3-yl)-4-methoxybenzene (3m)**: According to *General Procedure B* Flash column chromatography eluent, petroleum ether/ethyl acetate = 100:0 to 100:1; Reaction time = 12 h; yield: 32% (9.4 mg); > 95:5 *rr*; a colourless sticky oil;  $[\alpha]_D^{20} = -23.4$  (c 0.35,  $CHCl_3$ );  $^1H$  NMR (400 MHz,  $CDCl_3$ )  $\delta$  7.25 (m, 3H), 7.20 – 7.05 (m, 4H), 6.89 – 6.70 (m, 2H), 6.26 (d,  $J = 16.7$  Hz, 1H), 5.15 – 5.00 (m, 2H), 3.79 (s, 3H), 3.16 (d,  $J = 9.8$  Hz, 1H), 2.59 (t,  $J = 8.8$  Hz, 2H), 1.60 – 1.46 (m, 2H), 0.95 (s, 3H), 0.91 (s, 3H);  $^{13}C$  NMR (100 MHz,  $CDCl_3$ )  $\delta$  160.77, 143.39, 138.76, 134.53, 130.20, 128.36, 128.30, 125.54, 116.12, 113.25, 58.93, 55.20, 42.98, 36.43, 30.45, 24.98, 24.70; HRMS (ESI)  $m/z$ :  $[M+Na]^+$  Calcd for  $C_{21}H_{26}NaO$  requires  $m/z$  317.1876, found  $m/z$  317.1872; Enantiomeric ratio: 94:6, determined by HPLC (Daicel Chiralpak OD-H, hexane/isopropanol = 100/0, flow rate 1.0 mL/min,  $T = 25\text{ }^\circ\text{C}$ , 220 nm):  $t_R = 17.14$  min (major),  $t_R = 22.61$  min (minor). ( $\pm$ )-**3m**: According to *General Procedure A*.

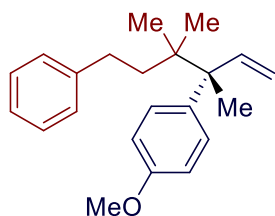

**3n**

**(S)-1-methoxy-4-(3,4,4-trimethyl-6-phenylhex-1-en-3-yl)benzene (3n)**: According to *General Procedure B* Flash column chromatography eluent, petroleum ether/ethyl acetate = 100:0 to 100:1; Reaction time = 12 h; yield: 30% (9.3 mg); > 95:5 *rr*; a colourless sticky oil;  $[\alpha]_D^{20} = -16.2$  (c 0.25,

CHCl<sub>3</sub>); <sup>1</sup>H NMR (400 MHz, CDCl<sub>3</sub>) δ 7.31 – 7.21 (m, 4H), 7.20 – 7.09 (m, 3H), 6.83 – 6.75 (m, 2H), 6.72 (m, 1H), 5.14 (m, 1H), 5.02 (m, 1H), 3.79 (s, 3H), 2.51 – 2.42 (m, 2H), 1.60 – 1.49 (m, 2H), 1.45 (s, 3H), 0.93 (s, 6H); <sup>13</sup>C NMR (100 MHz, CDCl<sub>3</sub>) δ 157.30, 144.47, 143.59, 137.93, 130.02, 128.39, 128.28, 125.51, 113.66, 112.26, 55.14, 49.27, 39.57, 38.99, 31.36, 29.71, 22.31, 22.24, 20.42; HRMS (ESI) m/z: [M+Na]<sup>+</sup> Calcd for C<sub>22</sub>H<sub>28</sub>NaO requires m/z 331.2032, found m/z 331.2028; Enantiomeric ratio: 89:11, determined by HPLC (Daicel Chiralpak OD-H, hexane/isopropanol = 100/0, flow rate 1.0 mL/min, T = 25 °C, 220 nm): t<sub>R</sub> = 22.00 min (major), t<sub>R</sub> = 28.61 min (minor). (±)-**3n**: According to *General Procedure A*.

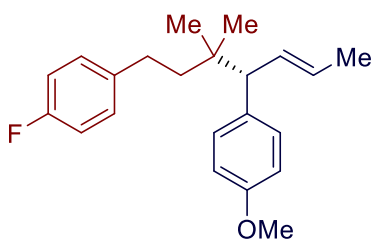

**3o**

(*S,E*)-1-fluoro-4-(4-(4-methoxyphenyl)-3,3-dimethylhept-5-en-1-yl)benzene (**3o**): According to *General Procedure B* Flash column chromatography eluent, petroleum ether/ethyl acetate = 100:0 to 100:1; Reaction time = 12 h; yield: 56% (18.3 mg); > 95:5 *rr*; > 95:5 *E:Z*; a colourless sticky oil; [α]<sub>D</sub><sup>20</sup> = -18.1 (c 0.40, CHCl<sub>3</sub>); <sup>1</sup>H NMR (400 MHz, CDCl<sub>3</sub>) δ 7.08 (m, 4H), 6.97 – 6.90 (m, 2H), 6.84 – 6.79 (m, 2H), 5.86 (m, 1H), 5.48 (m, 1H), 3.78 (s, 3H), 3.10 (d, *J* = 9.9 Hz, 1H), 2.58 – 2.50 (m, 2H), 1.68 (m, 3H), 1.52 – 1.40 (m, 2H), 0.92 (s, 3H), 0.88 (s, 3H); <sup>13</sup>C NMR (100 MHz, CDCl<sub>3</sub>) δ 161.09 (d, *J* = 243.0 Hz), 159.88, 139.04 (d, *J* = 2.6 Hz), 135.13, 131.26, 130.15, 129.58 (d, *J* = 7.7 Hz), 126.59, 114.97 (d, *J* = 21.0 Hz), 113.19, 57.65, 55.19, 43.19, 36.57, 29.67, 25.01, 24.76, 18.15; <sup>19</sup>F NMR (376 MHz, CDCl<sub>3</sub>) δ -118.29. HRMS (ESI) m/z: [M+Na]<sup>+</sup> Calcd for C<sub>22</sub>H<sub>27</sub>FNaO requires m/z 349.1938, found m/z 349.1935 Enantiomeric ratio: 95:5, determined by HPLC (Daicel Chiralpak OJ-H, hexane/ethanol = 99/1, flow rate 0.8 mL/min, T = 25 °C, 220 nm): t<sub>R</sub> = 8.69 min (major), t<sub>R</sub> = 10.28 min (minor). (±)-**3o**: According to *General Procedure A*.

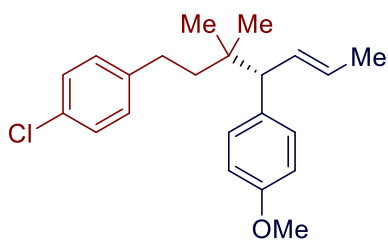

**3p**

**(*S,E*)-1-chloro-4-(4-(4-methoxyphenyl)-3,3-dimethylhept-5-en-1-yl)benzene (3p):** According to **General Procedure B** Flash column chromatography eluent, petroleum ether/ethyl acetate = 100:0 to 100:1; Reaction time = 12 h; yield: 60% (20.6 mg); a colourless sticky oil; > 95:5 *rr*; > 95:5 *E:Z*;  $[\alpha]_D^{20} = -8.8$  (c 0.36,  $\text{CHCl}_3$ );  $^1\text{H NMR}$  (400 MHz,  $\text{CDCl}_3$ )  $\delta$  7.27 – 7.18 (m, 2H), 7.11 – 7.02 (m, 4H), 6.84 – 6.79 (m, 2H), 5.85 (m, 1H), 5.47 (m, 1H), 3.78 (s, 3H), 3.09 (d,  $J = 9.9$  Hz, 1H), 2.62 – 2.43 (m, 2H), 1.68 (m, 3H), 1.52 – 1.40 (m, 2H), 0.91 (s, 3H), 0.87 (s, 3H);  $^{13}\text{C NMR}$  (100 MHz,  $\text{CDCl}_3$ )  $\delta$  157.80, 141.94, 135.07, 131.21, 130.14, 129.68, 128.36, 126.64, 113.20, 113.12, 57.68, 55.20, 43.00, 36.58, 29.89, 24.98, 24.75, 18.14; HRMS (ESI)  $m/z$ :  $[\text{M}+\text{Na}]^+$  Calcd for  $\text{C}_{22}\text{H}_{27}\text{ClNaO}$  requires  $m/z$  365.1643, found  $m/z$  365.1637; Enantiomeric ratio: 96:4, determined by HPLC (Daicel Chiralpak OJ-H, hexane/ethanol = 99/1, flow rate 1.0 mL/min,  $T = 25$  °C, 220 nm):  $t_R = 10.44$  min (major),  $t_R = 13.01$  min (minor). ( $\pm$ )-**3p**: According to **General Procedure A**.

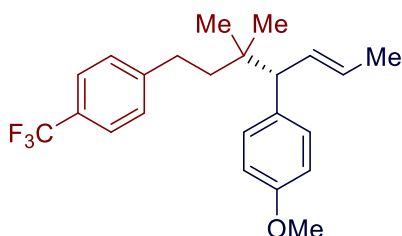

**3q**

**(*S,E*)-1-(5,5-dimethyl-7-(4-(trifluoromethyl)phenyl)hept-2-en-4-yl)-4-methoxybenzene (3q):** According to **General Procedure B** Flash column chromatography eluent, petroleum ether/ethyl acetate = 100:0 to 100:1; Reaction time = 12 h; yield: 68% (25.6 mg); > 95:5 *rr*; > 95:5 *E:Z*; a colourless sticky oil;  $[\alpha]_D^{20} = -9.4$  (c 0.30,  $\text{CHCl}_3$ );  $^1\text{H NMR}$  (400 MHz,  $\text{CDCl}_3$ )  $\delta$  7.50 (m, 2H), 7.23 (m, 2H), 7.12 – 7.07 (m, 2H), 6.82 (m, 2H), 5.92 – 5.81 (m, 1H), 5.49 (m, 1H), 3.78 (s, 3H), 3.10 (d,  $J = 9.9$  Hz, 1H), 2.63 (t,  $J = 8.8$  Hz, 2H), 1.69 (m, 3H), 1.49 (m, 2H), 0.93 (s, 3H), 0.89 (s, 3H);  $^{13}\text{C NMR}$  (100 MHz,  $\text{CDCl}_3$ )  $\delta$  157.83, 147.67, 135.00, 131.15, 130.13, 128.63, 126.72, 125.21 (q,  $J = 4.0$  Hz), 124.41 (q,  $J = 270.0$  Hz), 113.23, 57.67, 55.20, 42.83, 36.62, 30.45, 24.97, 24.74, 18.13;  $^{19}\text{F NMR}$  (376 MHz,  $\text{CDCl}_3$ )  $\delta$  -62.25. HRMS (ESI)  $m/z$ :  $[\text{M}+\text{Na}]^+$  Calcd for

$C_{23}H_{27}F_3NaO$  requires  $m/z$  399.1906, found  $m/z$  399.1898; Enantiomeric ratio: 96:4, determined by HPLC (Daicel Chiralpak OJ-H, hexane/ethanol = 99/1, flow rate 1.0 mL/min,  $T = 25\text{ }^\circ\text{C}$ , 220 nm):  $t_R = 9.23$  min (major),  $t_R = 12.92$  min (minor). ( $\pm$ )-**3q**: According to *General Procedure A*.

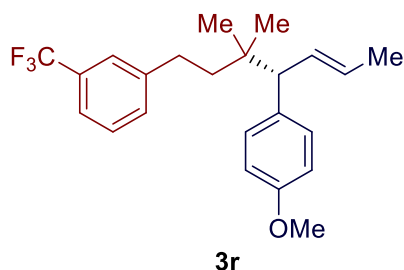

**(*S,E*)-1-(4-(4-methoxyphenyl)-3,3-dimethylhept-5-en-1-yl)-3-(trifluoromethyl)benzene (3r):**

According to *General Procedure B* Flash column chromatography eluent, petroleum ether/ethyl acetate = 100:0 to 100:1; Reaction time = 12 h; yield: 66% (24.8 mg); a colourless sticky oil; > 95:5 *rr*; > 95:5 *E:Z*;  $[\alpha]_D^{20} = -10.3$  (c 0.30,  $CHCl_3$ );  $^1H$  NMR (400 MHz,  $CDCl_3$ )  $\delta$  7.45 – 7.27 (m, 4H), 7.14 – 7.06 (m, 2H), 6.87 – 6.78 (m, 2H), 5.87 (m, 1H), 5.50 (m, 1H), 3.78 (s, 3H), 3.12 (d,  $J = 9.9$  Hz, 1H), 2.70 – 2.55 (m, 2H), 1.69 (m, 3H), 1.55 – 1.42 (m, 2H), 0.93 (s, 3H), 0.89 (s, 3H);  $^{13}C$  NMR (100 MHz,  $CDCl_3$ )  $\delta$  157.85, 144.36, 135.01, 131.74, 131.16, 130.39, 130.14, 128.66, 126.73, 125.05 (q,  $J = 4.2$  Hz), 124.30 (q,  $J = 270.0$  Hz) 122.42 (q,  $J = 4.2$  Hz), 113.23, 57.52, 55.19, 42.98, 36.60, 30.37, 29.71, 25.03, 24.76, 18.10;  $^{19}F$  NMR (376 MHz,  $CDCl_3$ )  $\delta$  -62.54. HRMS (ESI)  $m/z$ :  $[M+Na]^+$  Calcd for  $C_{23}H_{27}F_3NaO$  requires  $m/z$  399.1906, found  $m/z$  399.1898; Enantiomeric ratio: 98:2, determined by HPLC (Daicel Chiralpak OD-H, hexane/isopropanol = 100/0, flow rate 1.0 mL/min,  $T = 25\text{ }^\circ\text{C}$ , 220 nm):  $t_R = 11.52$  min (major),  $t_R = 22.36$  min (minor). ( $\pm$ )-**3r**: According to *General Procedure A*.

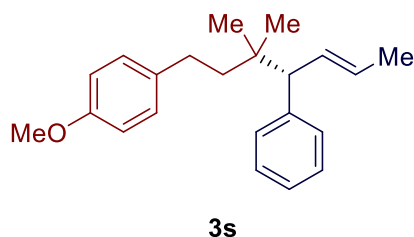

**(*S,E*)-1-(3,3-dimethyl-4-phenylhept-5-en-1-yl)-4-methoxybenzene (3s):** According to *General Procedure B* Flash column chromatography eluent, petroleum ether/ethyl acetate = 100:0 to 100:1; Reaction time = 12 h; yield: 54% (16.7 mg); a colourless sticky oil; > 95:5 *rr*; > 95:5 *E:Z*;  $[\alpha]_D^{20} = -12.6$  (c 0.41,  $CHCl_3$ );  $^1H$  NMR (400 MHz,  $CDCl_3$ )  $\delta$  7.28 – 7.23 (m, 2H), 7.21 – 7.14 (m, 3H), 7.07

– 7.01 (m, 2H), 6.84 – 6.78 (m, 2H), 5.89 (m, 1H), 5.55 – 5.43 (m, 1H), 3.78 (s, 3H), 3.15 (d,  $J = 9.9$  Hz, 1H), 2.57 – 2.48 (m, 2H), 1.68 (m, 3H), 1.52 – 1.41 (m, 2H), 0.93 (s, 3H), 0.89 (s, 3H);  $^{13}\text{C}$  NMR (100 MHz,  $\text{CDCl}_3$ )  $\delta$  157.57, 143.11, 135.53, 131.12, 129.39, 129.17, 127.73, 126.83, 125.88, 113.74, 58.55, 55.26, 43.29, 36.56, 29.49, 25.11, 24.78, 18.15; HRMS (ESI)  $m/z$ :  $[\text{M}+\text{Na}]^+$  Calcd for  $\text{C}_{22}\text{H}_{28}\text{NaO}$  requires  $m/z$  331.2032, found  $m/z$  331.2028; Enantiomeric ratio: 95:5, determined by HPLC (Daicel Chiralpak OJ-H, hexane/ethanol = 99/1, flow rate 1.0 mL/min,  $T = 25$  °C, 220 nm):  $t_{\text{R}} = 12.54$  min (major),  $t_{\text{R}} = 11.19$  min (minor). (+)-**3s**: According to *General Procedure A*.

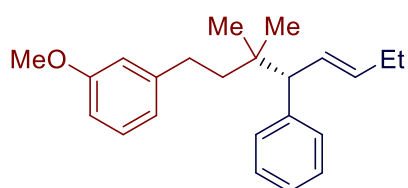

**3t**

(*S,E*)-1-(3,3-dimethyl-4-phenyloct-5-en-1-yl)-3-methoxybenzene (**3t**): According to *General Procedure B* Flash column chromatography eluent, petroleum ether/ethyl acetate = 100:0 to 100:1; Reaction time = 12 h; yield: 56% (18.1 mg); > 95:5 *rr*; > 95:5 *E:Z*; a colourless sticky oil;  $[\alpha]_{\text{D}}^{20} = -13.3$  (c 0.29,  $\text{CHCl}_3$ );  $^1\text{H}$  NMR (400 MHz,  $\text{CDCl}_3$ )  $\delta$  7.28 – 7.24 (m, 2H), 7.20 – 7.15 (m, 4H), 6.79 – 6.65 (m, 3H), 5.87 (m, 1H), 5.54 (m, 1H), 3.78 (s, 3H), 3.16 (d,  $J = 9.9$  Hz, 1H), 2.57 (m, 2H), 2.10 – 1.99 (m, 2H), 1.57 – 1.43 (m, 2H), 0.98 (t,  $J = 7.4$  Hz, 3H), 0.94 (s, 3H), 0.89 (s, 3H);  $^{13}\text{C}$  NMR (100 MHz,  $\text{CDCl}_3$ )  $\delta$  159.60, 145.17, 143.14, 134.06, 129.41, 129.22, 128.79, 127.72, 125.88, 120.80, 114.13, 110.82, 58.25, 55.12, 42.93, 36.60, 30.53, 25.77, 25.17, 24.87, 13.90; HRMS (ESI)  $m/z$ :  $[\text{M}+\text{Na}]^+$  Calcd for  $\text{C}_{23}\text{H}_{30}\text{NaO}$  requires  $m/z$  345.2189, found  $m/z$  345.2180; Enantiomeric ratio: 97:3, determined by HPLC (Daicel Chiralpak OD-H, hexane/isopropanol = 99.3/0.7, flow rate 0.8 mL/min,  $T = 25$  °C, 220 nm):  $t_{\text{R}} = 11.28$  min (major),  $t_{\text{R}} = 10.65$  min (minor). (+)-**3t**: According to *General Procedure A*.

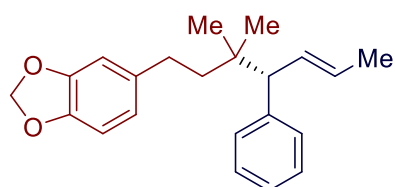

**3u**

(*S,E*)-5-(3,3-dimethyl-4-phenylhept-5-en-1-yl)benzo[*d*][1,3]dioxole (**3u**): According to *General*



**Procedure B** Flash column chromatography eluent, petroleum ether/ethyl acetate = 100:0 to 100:1; Reaction time = 12 h; yield: 48% (15.5 mg); > 95:5 *rr*; > 95:5 *E:Z*; a colourless sticky oil;  $[\alpha]_D^{20} = -17.5$  (c 0.26, CHCl<sub>3</sub>); <sup>1</sup>H NMR (400 MHz, CDCl<sub>3</sub>) δ 7.27 – 7.23 (m, 2H), 7.21 – 7.15 (m, 3H), 6.70 (d, *J* = 7.9 Hz, 1H), 6.64 – 6.53 (m, 2H), 5.96 – 5.80 (m, 1H), 5.90 (s, 2H), 5.49 (m, 1H), 3.13 (d, *J* = 9.9 Hz, 1H), 2.54 – 2.45 (m, 2H), 1.69 (m, 3H), 1.50 – 1.41 (m, 2H), 0.92 (s, 3H), 0.88 (s, 3H); <sup>13</sup>C NMR (100 MHz, CDCl<sub>3</sub>) δ 147.45, 145.36, 143.05, 137.34, 131.08, 129.37, 127.75, 126.88, 125.92, 120.89, 108.85, 108.10, 100.69, 58.55, 43.35, 36.54, 30.21, 25.09, 24.78, 18.15; HRMS (ESI) *m/z*: [M+Na]<sup>+</sup> Calcd for C<sub>22</sub>H<sub>26</sub>NaO<sub>2</sub> requires *m/z* 345.1825, found *m/z* 345.1817; Enantiomeric ratio: 96:4, determined by HPLC (Daicel Chiralpak OJ-H, hexane/ethanol = 99/1, flow rate 1.0 mL/min, T = 25 °C, 220 nm): *t<sub>R</sub>* = 12.47 min (major), *t<sub>R</sub>* = 9.92 min (minor). (±)-**3u**: According to **General Procedure A**.

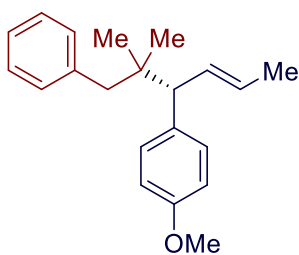

**3v**

**(*S,E*)-1-(2,2-dimethyl-1-phenylhex-4-en-3-yl)-4-methoxybenzene (3v)**: According to **General Procedure B** Flash column chromatography eluent, petroleum ether/ethyl acetate = 100:0 to 100:1; Reaction time = 12 h; yield: 64% (18.8 mg); a colourless sticky oil; > 95:5 *rr*; > 95:5 *E:Z*;  $[\alpha]_D^{20} = -17.6$  (c 0.46, CHCl<sub>3</sub>); <sup>1</sup>H NMR (400 MHz, CDCl<sub>3</sub>) δ 7.26 – 7.20 (m, 2H), 7.20 – 7.15 (m, 1H), 7.13 – 7.06 (m, 4H), 6.85 – 6.81 (m, 2H), 5.99 – 5.90 (m, 1H), 5.55 – 5.45 (m, 1H), 3.79 (s, 3H), 3.07 (d, *J* = 9.8 Hz, 1H), 2.60 – 2.43 (m, 2H), 1.72 (m, 3H), 0.81 (s, 3H), 0.72 (s, 3H); <sup>13</sup>C NMR (100 MHz, CDCl<sub>3</sub>) δ 157.82, 139.42, 135.21, 131.34, 130.90, 130.31, 127.52, 127.15, 125.65, 113.22, 59.45, 55.20, 46.57, 37.74, 24.51, 23.96, 18.22; HRMS (ESI) *m/z*: [M+Na]<sup>+</sup> Calcd for C<sub>21</sub>H<sub>26</sub>NaO requires *m/z* 317.1876, found *m/z* 317.1877; Enantiomeric ratio: 96:4, determined by HPLC (Daicel Chiralpak OD-H, hexane/isopropanol = 100/0, flow rate 1.0 mL/min, T = 25 °C, 220 nm): *t<sub>R</sub>* = 16.94 min (major), *t<sub>R</sub>* = 26.57 min (minor). (±)-**3v**: According to **General Procedure A**.

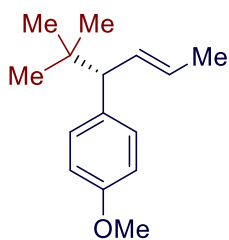

**3w**

**(*S,E*)-1-(2,2-dimethylhex-4-en-3-yl)-4-methoxybenzene (3w):** According to *General Procedure B* Flash column chromatography eluent, petroleum ether/ethyl acetate = 100:0; Reaction time = 12 h; yield: 50% (10.9 mg); > 95:5 *rr*; > 95:5 *E:Z*; a colourless sticky oil;  $[\alpha]_D^{20} = -18.2$  (c 0.37, CHCl<sub>3</sub>); <sup>1</sup>H NMR (400 MHz, CDCl<sub>3</sub>) δ 7.10 – 7.04 (m, 2H), 6.84 – 6.78 (m, 2H), 5.94 – 5.75 (m, 1H), 5.49 – 5.37 (m, 1H), 3.78 (s, 3H), 2.92 (d, *J* = 9.8 Hz, 1H), 1.67 (m, 3H), 0.85 (s, 9H); <sup>13</sup>C NMR (100 MHz, CDCl<sub>3</sub>) δ 157.70, 135.68, 131.64, 129.95, 126.36, 113.09, 59.35, 55.19, 34.02, 29.70, 28.01, 27.74, 18.07 ; HRMS (ESI) *m/z*: [M+Na]<sup>+</sup> Calcd for C<sub>15</sub>H<sub>22</sub>NaO requires *m/z* 241.1563, found *m/z* 241.1564; Enantiomeric ratio: 95:5, determined by HPLC (Daicel Chiralpak OD-H, hexane/isopropanol = 100/0, flow rate 1.0 mL/min, T = 25 °C, 220 nm): *t*<sub>R</sub> = 7.58 min (major), *t*<sub>R</sub> = 11.16 min (minor). (±)-**3w**: According to *General Procedure A*.

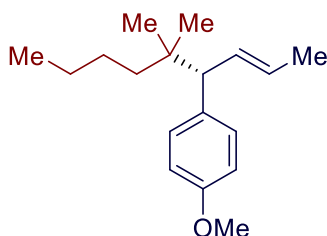

**3x**

**(*S,E*)-1-(5,5-dimethylnon-2-en-4-yl)-4-methoxybenzene (3x):** According to *General Procedure B* Flash column chromatography eluent, petroleum ether/ethyl acetate = 100:0; Reaction time = 12 h; yield: 64% (16.6 mg); > 95:5 *rr*; > 95:5 *E:Z*; a colourless sticky oil;  $[\alpha]_D^{20} = -24.7$  (c 0.48, CHCl<sub>3</sub>); <sup>1</sup>H NMR (400 MHz, CDCl<sub>3</sub>) δ 7.13 – 7.01 (m, 2H), 6.86 – 6.74 (m, 2H), 5.88 – 5.78 (m, 1H), 5.47 – 5.36 (m, 1H), 3.78 (s, 3H), 3.02 (d, *J* = 9.8 Hz, 1H), 1.66 (m, 3H), 1.25 – 1.10 (m, 6H), 0.91 – 0.85 (m, 3H), 0.83 (s, 3H), 0.76 (s, 3H); <sup>13</sup>C NMR (100 MHz, CDCl<sub>3</sub>) δ 157.64, 135.55, 131.55, 130.16, 126.22, 113.06, 57.75, 55.17, 40.34, 36.36, 26.07, 24.90, 24.75, 23.63, 18.11, 14.23; HRMS (ESI) *m/z*: [M+Na]<sup>+</sup> Calcd for C<sub>18</sub>H<sub>28</sub>NaO requires *m/z* 283.2032, found *m/z* 283.2027; Enantiomeric ratio: 97:3, determined by HPLC (Daicel Chiralpak OD-H, pentane/isopropanol =

100/0, flow rate 1.0 mL/min, T = 25 °C, 220 nm):  $t_R$  = 7.20 min (major),  $t_R$  = 11.88 min (minor).

(±)-**3x**: According to *General Procedure A*.

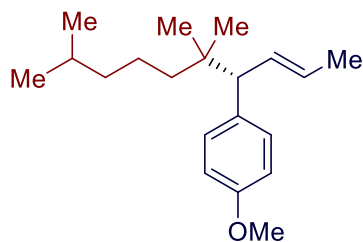

**3y**

(*S,E*)-1-methoxy-4-(5,5,9-trimethyldec-2-en-4-yl)benzene (**3y**): According to *General Procedure B* Flash column chromatography eluent, petroleum ether/ethyl acetate = 100:0 to 100:1; Reaction time = 12 h; yield: 59% (17.0 mg); > 95:5 *rr*; > 95:5 *E:Z*; a colourless sticky oil;  $[\alpha]_D^{20}$  = -24.8 (c 0.53, CHCl<sub>3</sub>); <sup>1</sup>H NMR (400 MHz, CDCl<sub>3</sub>) δ 7.16 – 6.98 (m, 2H), 6.89 – 6.73 (m, 2H), 5.83 (m, 1H), 5.42 (m, 1H), 3.78 (s, 3H), 3.02 (d, *J* = 9.9 Hz, 1H), 1.66 (m, 3H), 1.55 – 1.46 (m, 1H), 1.25 – 1.18 (m, 2H), 1.16 – 1.05 (m, 4H), 0.86 (m, 6H), 0.83 (s, 3H), 0.77 (s, 3H); <sup>13</sup>C NMR (100 MHz, CDCl<sub>3</sub>) δ 157.64, 135.54, 131.55, 130.15, 126.23, 113.06, 57.82, 55.17, 40.86, 39.99, 36.46, 27.98, 24.90, 24.76, 22.72, 22.66, 21.48, 18.13; HRMS (ESI) *m/z*: [M+Na]<sup>+</sup> Calcd for C<sub>20</sub>H<sub>32</sub>NaO requires *m/z* 311.2345, found *m/z* 311.2338; Enantiomeric ratio: 98:2, determined by HPLC (Daicel Chiralpak OD-H, hexane/ isopropanol = 100/0, flow rate 1.0 mL/min, T = 25 °C, 220 nm):  $t_R$  = 5.76 min (major),  $t_R$  = 9.66 min (minor). (±)-**3y**: According to *General Procedure A*.

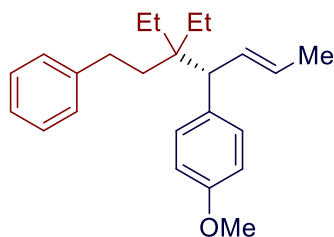

**3z**

(*S,E*)-1-(5,5-diethyl-7-phenylhept-2-en-4-yl)-4-methoxybenzene (**3z**): According to *General Procedure B* Flash column chromatography eluent, petroleum ether/ethyl acetate = 100:0 to 100:1; Reaction time = 12 h; yield: 65% (21.9 mg); > 95:5 *rr*; > 95:5 *E:Z*; a colourless sticky oil;  $[\alpha]_D^{20}$  = -23.6 (c 0.53, CHCl<sub>3</sub>); <sup>1</sup>H NMR (400 MHz, CDCl<sub>3</sub>) δ 7.30 – 7.23 (m, 2H), 7.15 (m, 5H), 6.85 – 6.79 (m, 2H), 6.00 – 5.89 (m, 1H), 5.43 (m, 1H), 3.78 (s, 3H), 3.28 (d, *J* = 9.8 Hz, 1H), 2.55 – 2.43 (m, 2H), 1.67 (m, 3H), 1.58 – 1.48 (m, 2H), 1.37 (m, 4H), 0.86 (m, 6H); <sup>13</sup>C NMR (100 MHz, CDCl<sub>3</sub>) δ

157.78, 143.78, 135.30, 132.32, 130.34, 128.33, 128.28, 125.90, 125.55, 113.25, 55.24, 55.20, 41.23, 37.55, 30.52, 27.70, 27.49, 18.18, 8.72, 8.67; HRMS (ESI)  $m/z$ :  $[M+Na]^+$  Calcd for  $C_{24}H_{32}NaO$  requires  $m/z$  359.2345, found  $m/z$  359.2339; Enantiomeric ratio: 97:3, determined by HPLC (Daicel Chiralpak OD-H, hexane/isopropanol = 99.5/0.5, flow rate 1.0 mL/min,  $T = 25\text{ }^\circ\text{C}$ , 220 nm):  $t_R = 9.04$  min (major),  $t_R = 10.41$  min (minor). ( $\pm$ )-**3z**: According to *General Procedure A*.

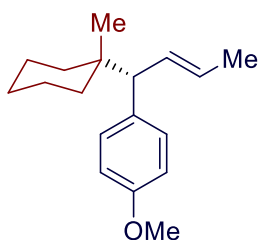

**3aa**

**(*S,E*)-1-methoxy-4-(1-(1-methylcyclohexyl)but-2-en-1-yl)benzene (3aa)**: According to *General Procedure B* Flash column chromatography eluent, petroleum ether/ethyl acetate = 100:0; Reaction time = 12 h; yield: 25% (6.5 mg); > 95:5 *rr*; > 95:5 *E:Z*; a colourless sticky oil;  $[\alpha]_D^{20} = -5.5$  (c 0.23,  $\text{CHCl}_3$ );  $^1\text{H NMR}$  (400 MHz,  $\text{CDCl}_3$ )  $\delta$  7.11 – 7.04 (m, 2H), 6.84 – 6.77 (m, 2H), 5.89 – 5.78 (m, 1H), 5.48 – 5.37 (m, 1H), 3.78 (s, 3H), 3.03 (d,  $J = 9.9$  Hz, 1H), 1.67 (m, 3H), 1.59 – 1.51 (m, 4H), 1.41 – 1.30 (m, 4H), 1.12 – 0.97 (m, 2H), 0.84 (s, 3H);  $^{13}\text{C NMR}$  (100 MHz,  $\text{CDCl}_3$ )  $\delta$  157.66, 135.13, 131.13, 130.24, 126.38, 113.03, 58.71, 55.18, 36.19, 36.16, 29.70, 26.35, 21.99, 21.93, 20.67, 18.13; HRMS (ESI)  $m/z$ :  $[M+Na]^+$  Calcd for  $C_{18}H_{26}NaO$  requires  $m/z$  281.1876, found  $m/z$  281.1874; Enantiomeric ratio: 98:2, determined by HPLC (Daicel Chiralpak OD-H, hexane/isopropanol = 100/0, flow rate 1.0 mL/min,  $T = 25\text{ }^\circ\text{C}$ , 220 nm):  $t_R = 7.39$  min (major),  $t_R = 10.98$  min (minor). ( $\pm$ )-**3aa**: According to *General Procedure A*.

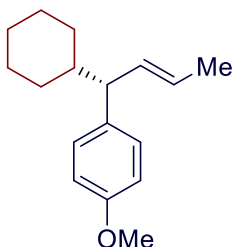

**3ab**

**(*R,E*)-1-(1-cyclohexylbut-2-en-1-yl)-4-methoxybenzene (3ab)**: According to *General Procedure*

**B'** (at °C) Flash column chromatography eluent, petroleum ether/ethyl acetate = 100:0; Reaction time = 12 h; yield: 40% (9.8 mg); > 95:5 *rr*; > 95:5 *E:Z*; a colourless sticky oil;  $[\alpha]_{\text{D}}^{20} = -7.7$  (c 0.40, CHCl<sub>3</sub>); <sup>1</sup>H NMR (400 MHz, CDCl<sub>3</sub>) δ 7.08 – 7.01 (m, 2H), 6.85 – 6.80 (m, 2H), 5.60 – 5.52 (m, 1H), 5.39 (m, 1H), 3.78 (s, 3H), 2.82 (m, 1H), 1.89 – 1.83 (m, 1H), 1.75 – 1.69 (m, 1H), 1.65 – 1.59 (m, 5H), 1.47 – 1.38 (m, 2H), 1.22 – 1.18 (m, 1H), 1.14 – 1.08 (m, 2H), 0.92 – 0.83 (m, 1H), 0.81 – 0.70 (m, 1H); <sup>13</sup>C NMR (100 MHz, CDCl<sub>3</sub>) δ 157.63, 137.05, 134.16, 128.67, 125.02, 113.67, 55.41, 55.20, 42.64, 31.39, 26.60, 26.44, 17.97; HRMS (ESI) *m/z*: [M+Na]<sup>+</sup> Calcd for C<sub>17</sub>H<sub>24</sub>NaO requires *m/z* 267.1719, found *m/z* 267.1718; Enantiomeric ratio: 97:3, determined by HPLC (Daicel Chiralpak OD-H, hexane/isopropanol = 100/0, flow rate 1.0 mL/min, T = 25 °C, 220 nm): *t<sub>R</sub>* = 7.38 min (major), *t<sub>R</sub>* = 8.59 min (minor). (±)-**3ab**: According to *General Procedure A*.

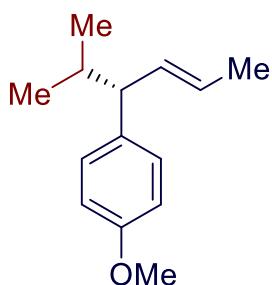

**3ac**

**(*R,E*)-1-methoxy-4-(2-methylhex-4-en-3-yl)benzene (3ac)**: According to *General Procedure B'* (at °C) Flash column chromatography eluent, petroleum ether/ethyl acetate = 100:0; Reaction time = 12 h; yield: 42% (8.6 mg); > 95:5 *rr*; > 95:5 *E:Z*; a colourless sticky oil;  $[\alpha]_{\text{D}}^{20} = -9.0$  (c 0.48, CHCl<sub>3</sub>); <sup>1</sup>H NMR (400 MHz, CDCl<sub>3</sub>) δ 7.05 – 6.92 (m, 2H), 6.81 – 6.68 (m, 2H), 5.58 – 5.46 (m, 1H), 5.38 – 5.31 (m, 1H), 3.71 (s, 3H), 2.73 – 2.69 (m, 1H), 1.79 – 1.72 (m, 1H), 1.58 (m, 3H), 0.85 (d, *J* = 6.7 Hz, 3H), 0.66 (d, *J* = 6.6 Hz, 3H); <sup>13</sup>C NMR (100 MHz, CDCl<sub>3</sub>) δ 157.65, 137.30, 134.13, 128.65, 125.15, 113.66, 56.37, 55.21, 33.10, 21.07, 20.77, 17.98; HRMS (ESI) *m/z*: [M+Na]<sup>+</sup> Calcd for C<sub>14</sub>H<sub>20</sub>NaO requires *m/z* 227.1406, found *m/z* 227.1407; Enantiomeric ratio: 94:6, determined by HPLC (Daicel Chiralpak OD-H, hexane/isopropanol = 100/0, flow rate 0.8 mL/min, T = 25 °C, 220 nm): *t<sub>R</sub>* = 9.56 min (major), *t<sub>R</sub>* = 13.11 min (minor). (±)-**3ac**: According to *General Procedure A*.

## 10. Attempt of other alkyl bromides

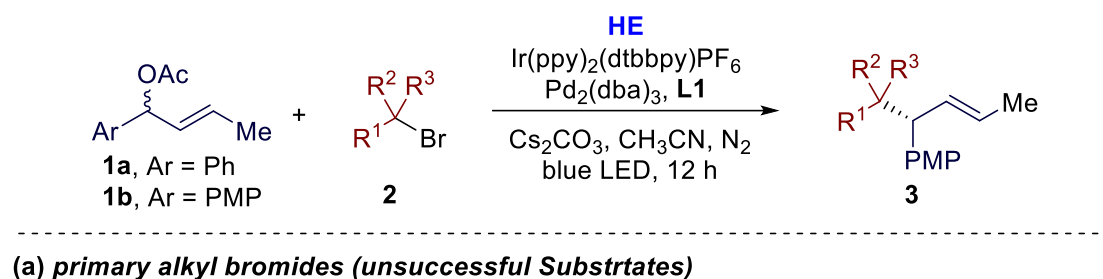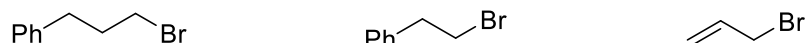

**(b) unsymmetric tertiary alkyl bromide**

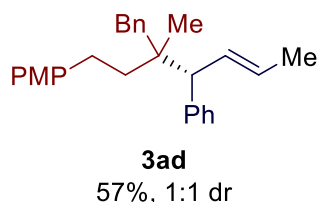

**Figure S7.** Attempt of other alkyl bromides.

Some alkyl bromides other than tertiary alkyl bromides were explored. As shown in Figure S7, Under the standard conditions, we were unable to obtain the reductive cross-coupling products with primary alkyl bromides. Unsymmetric tertiary alkyl bromide **2q** was also suitable for this reaction, although no diastereoselectivity (1: 1 dr) was observed.

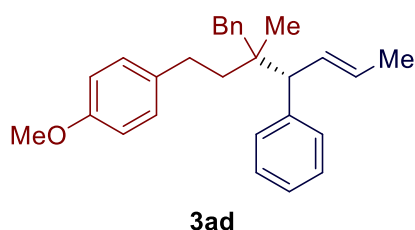

**((3*S*,*E*)-2-(4-methoxyphenethyl)-2-methylhex-4-ene-1,3-diyl)dibenzene (3ad):** According to **General Procedure B'** Flash column chromatography eluent, petroleum ether/ethyl acetate = 100:0; Reaction time = 12 h; yield: 57% (21.9 mg); inseparable diastereoisomers 1:1 *dr*; > 95:5 *rr*; > 95:5 *E:Z*; a colourless sticky oil;  $^1\text{H NMR}$  (400 MHz,  $\text{CDCl}_3$ )  $\delta$  7.32 – 7.17 (m, 16H), 7.13 – 7.07 (m, 4H), 7.05 – 7.01 (m, 2H), 6.97 – 6.93 (m, 2H), 6.82 – 6.75 (m, 4H), 6.12 – 5.97 (m, 2H), 5.67 – 5.54 (m, 2H), 3.77 (s, 3H), 3.76 (s, 3H), 3.43 (dd,  $J = 9.9, 7.6$  Hz, 2H), 2.77 – 2.68 (m, 4H), 2.66 – 2.56 (m, 2H), 2.51 – 2.40 (m, 2H), 1.84 – 1.67 (m, 6H), 1.60 – 1.53 (m, 2H), 1.45 – 1.31 (m, 2H),

0.88 (s, 3H), 0.85 (s, 3H);  $^{13}\text{C}$  NMR (100 MHz,  $\text{CDCl}_3$ )  $\delta$  157.65, 142.83, 138.95, 135.22, 131.00, 130.88, 130.82, 130.76, 129.81, 129.76, 129.12, 127.86, 127.68, 127.47, 127.32, 126.09, 125.84, 125.79, 113.79, 113.71, 56.63, 56.34, 55.27, 55.25, 43.05, 40.23, 40.15, 39.21, 38.66, 28.92, 22.35, 18.30.

## 11. References

- [1] (a) A. Serra-Muns, A. Guerinot, S. Reymond and J. Cossy, *Chem. Commun.*, 2010, **46**, 4178-4180. (b) Marion, Nicolas, R. Gealageas, and S. P. Nolan, *Org. Lett.*, 2007, **9**, 2653-2656.
- [2] (a) H. M. Huang, P. Bellotti, P. M. Pfluger, J. L. Schwarz, B. Heidrich and F. Glorius, *J. Am. Chem. Soc.*, 2020, **142**, 10173-10183. (b) A. S. Dudnik and G. C. Fu, *J. Am. Chem. Soc.*, 2012, **134**, 10693-10697. (c) L. Wang and C. Wang, *Org. Lett.*, 2020, **22**, 8829-8835.
- [3] F. Chen, Y. Zhang, L. Yu and S. Zhu, *Angew. Chem. Int. Ed.*, 2017, **56**, 2022-2025.
- [4] H.-H. Zhang, J.-J. Zhao and S. Yu, *J. Am. Chem. Soc.*, 2018, **140**, 16914-16919.

## 12. NMR spectra for all compounds

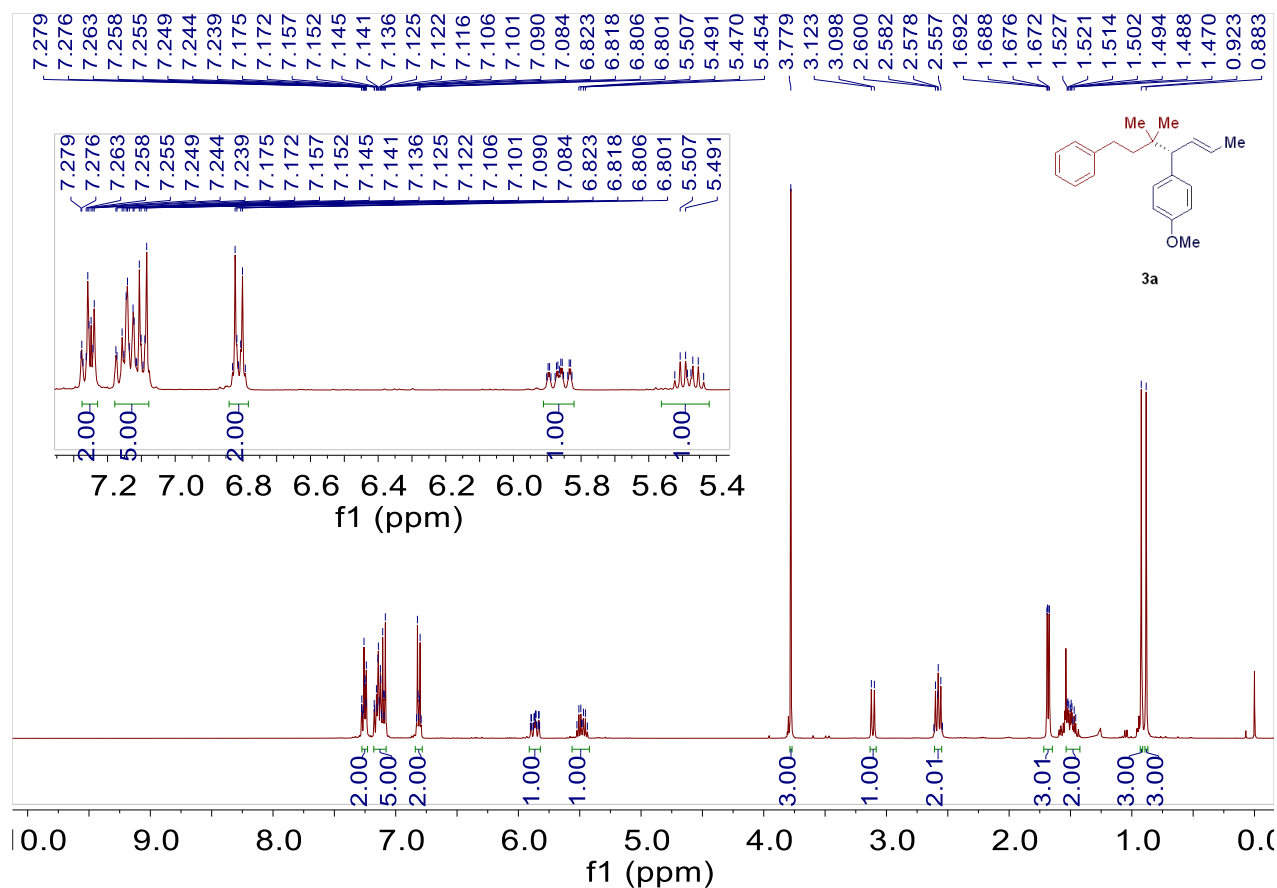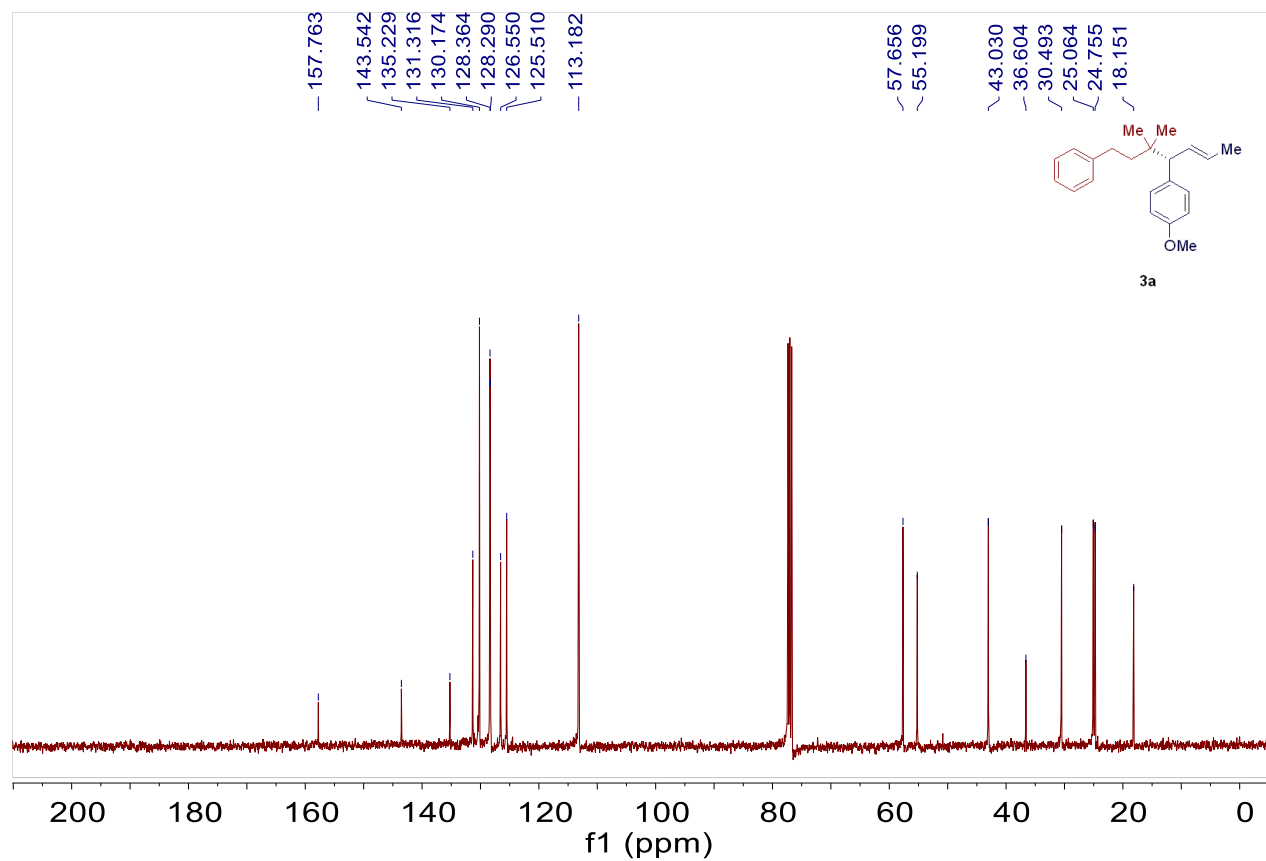



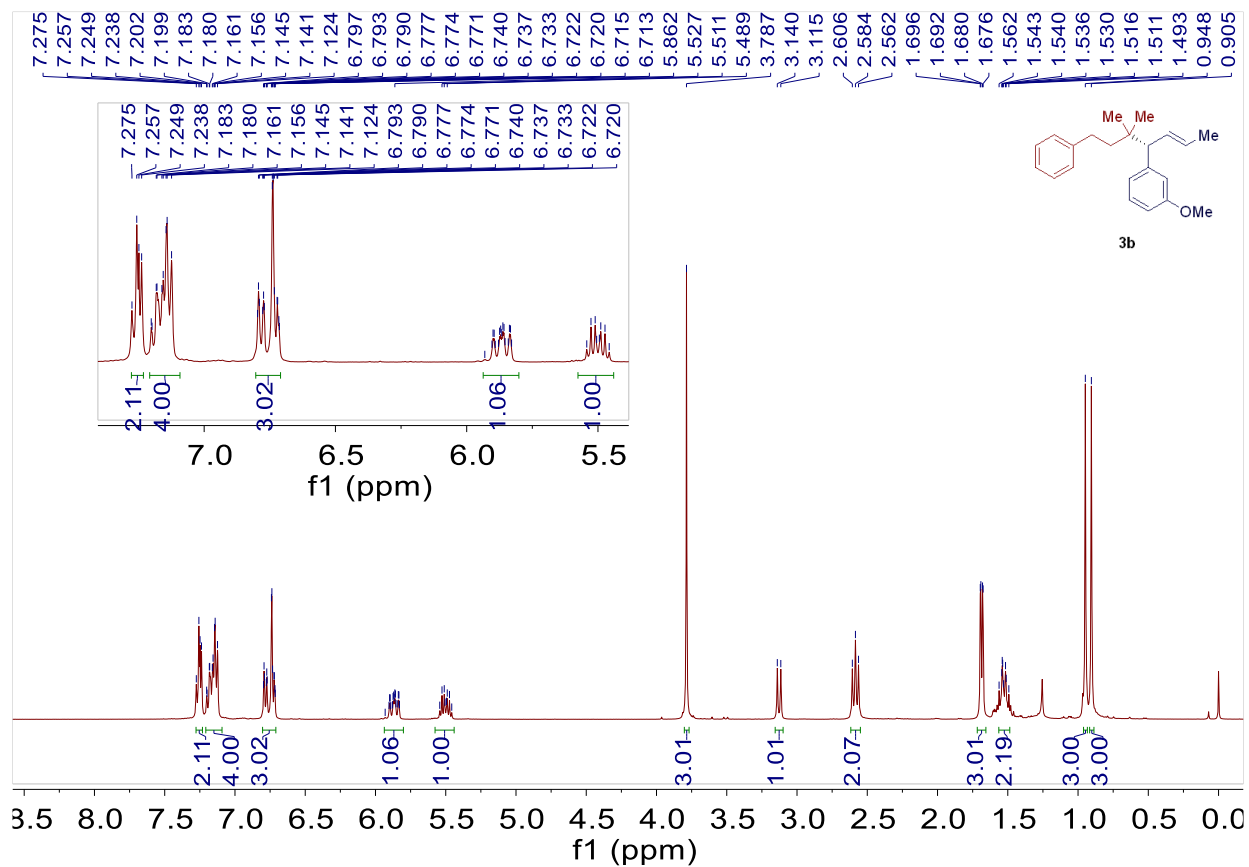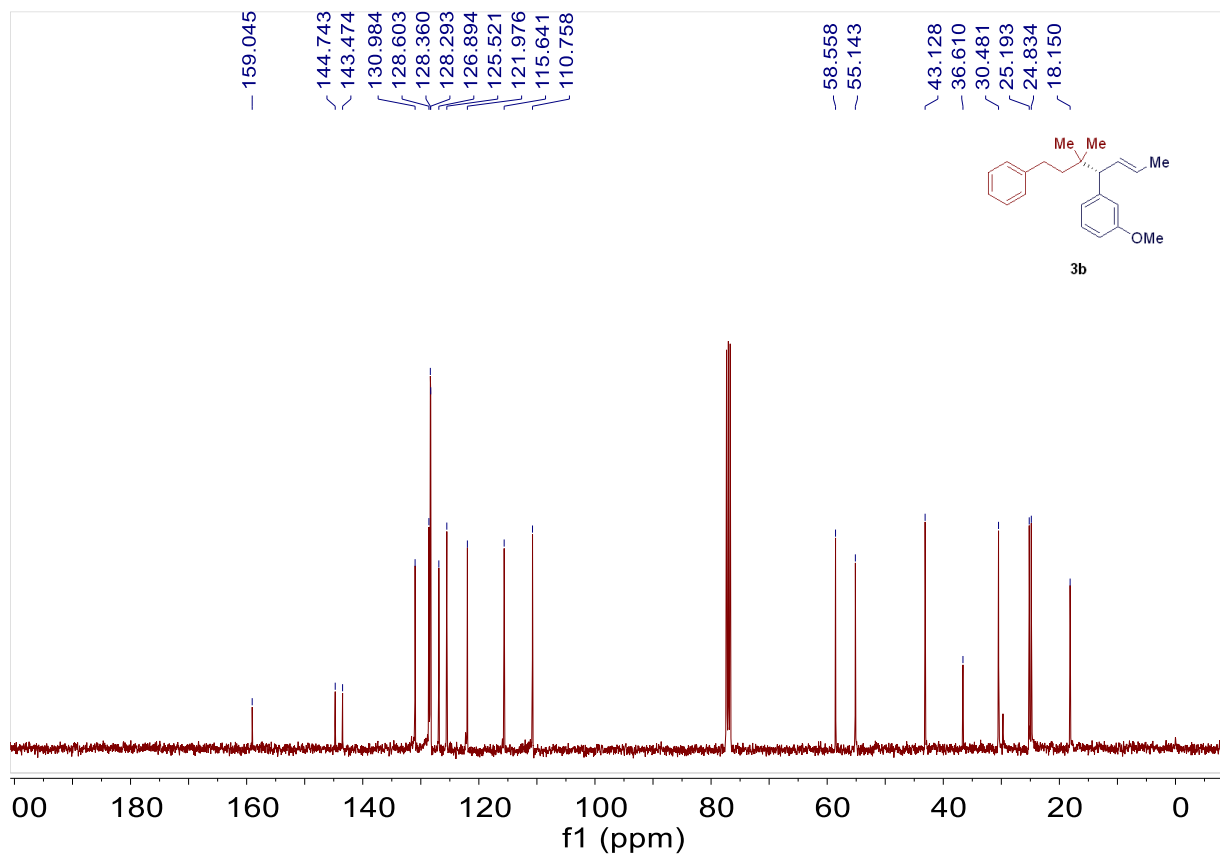

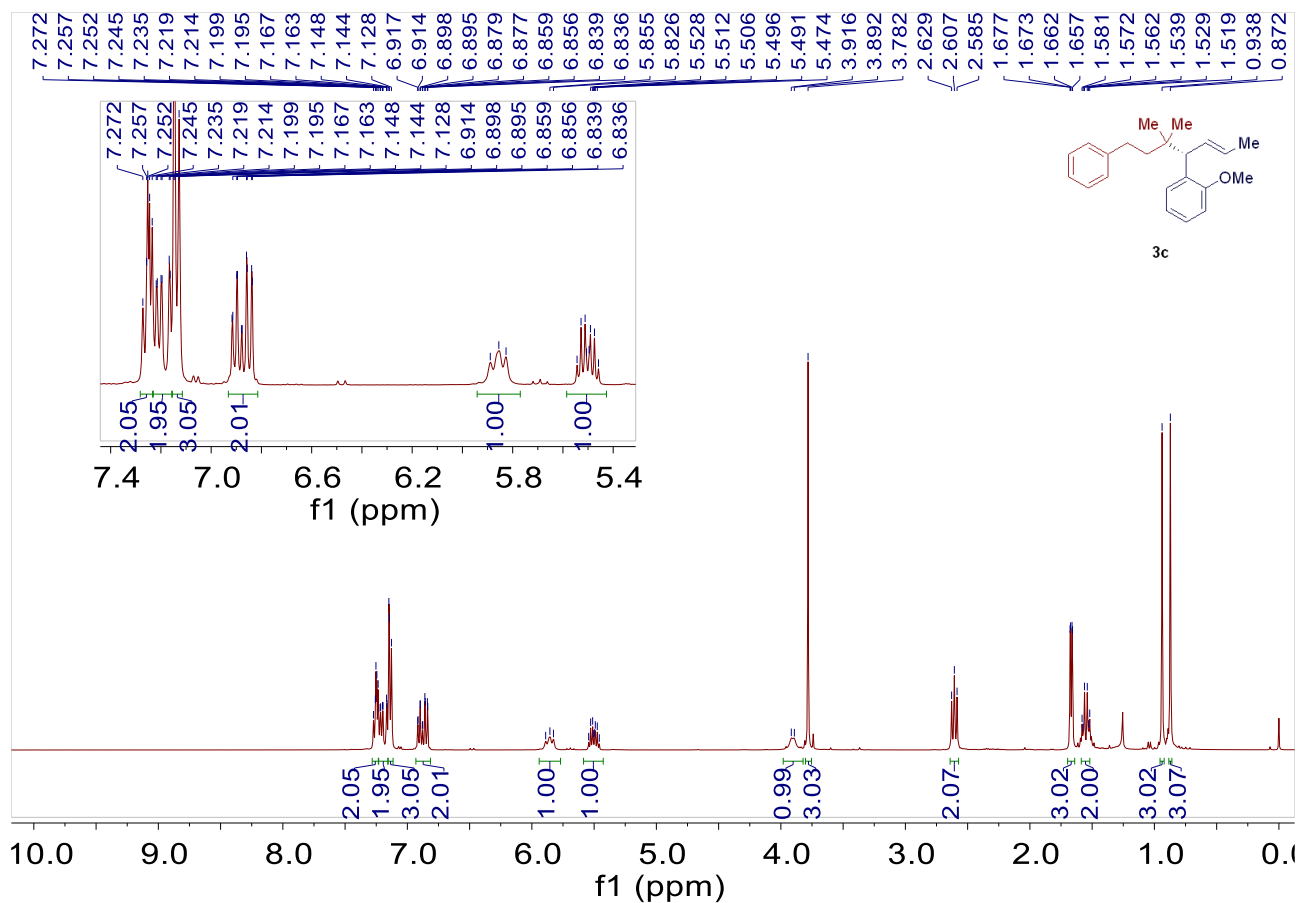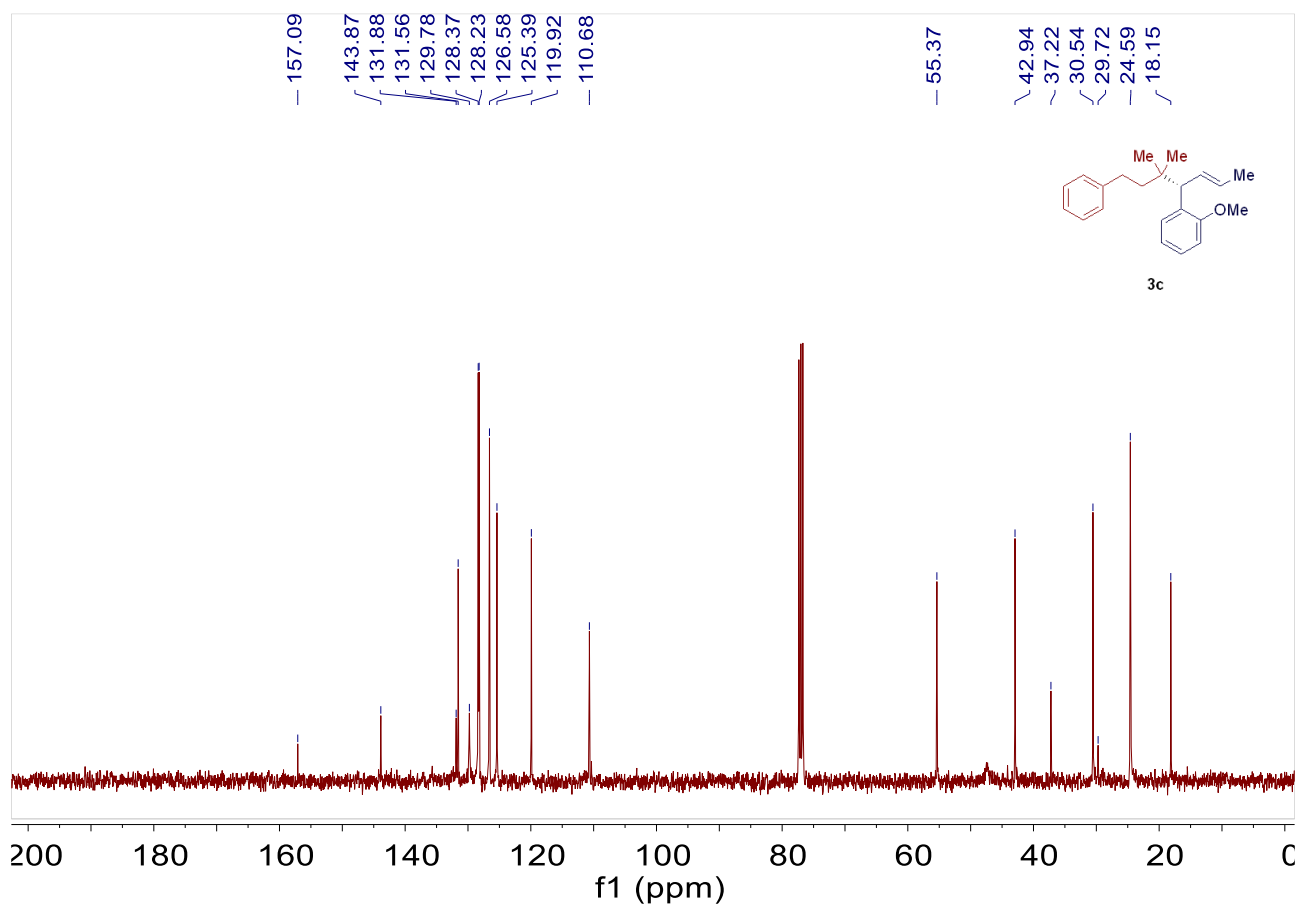

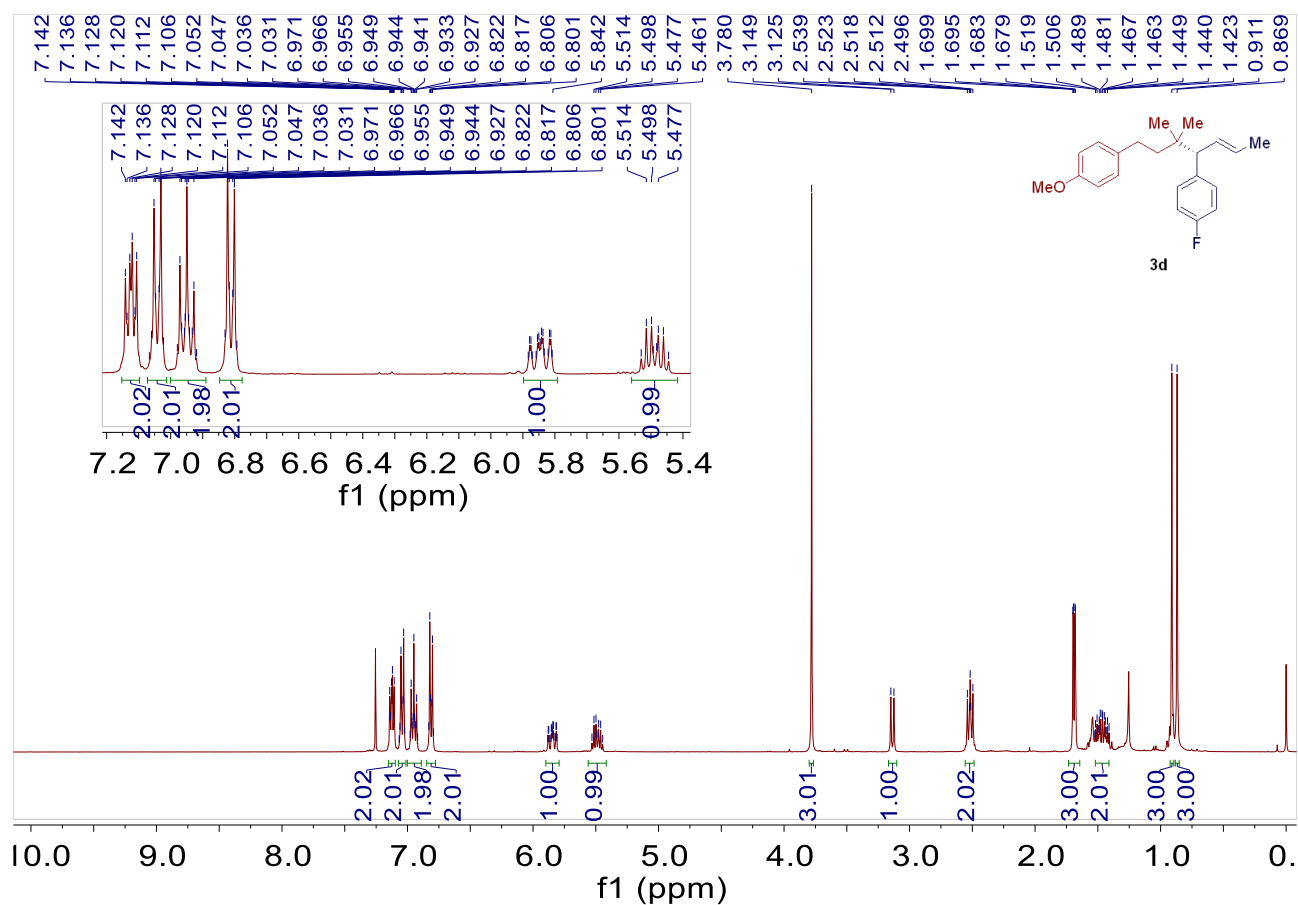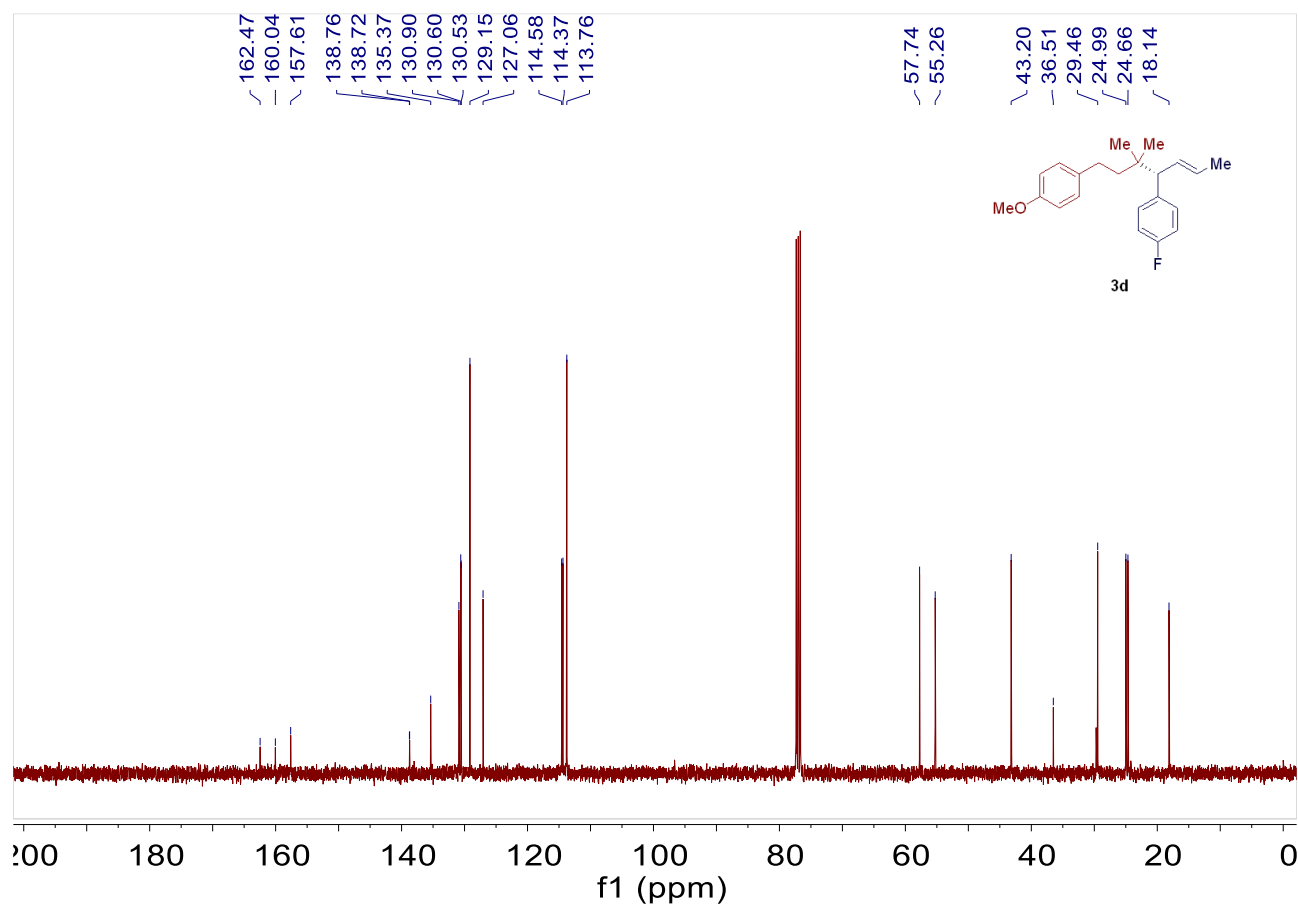

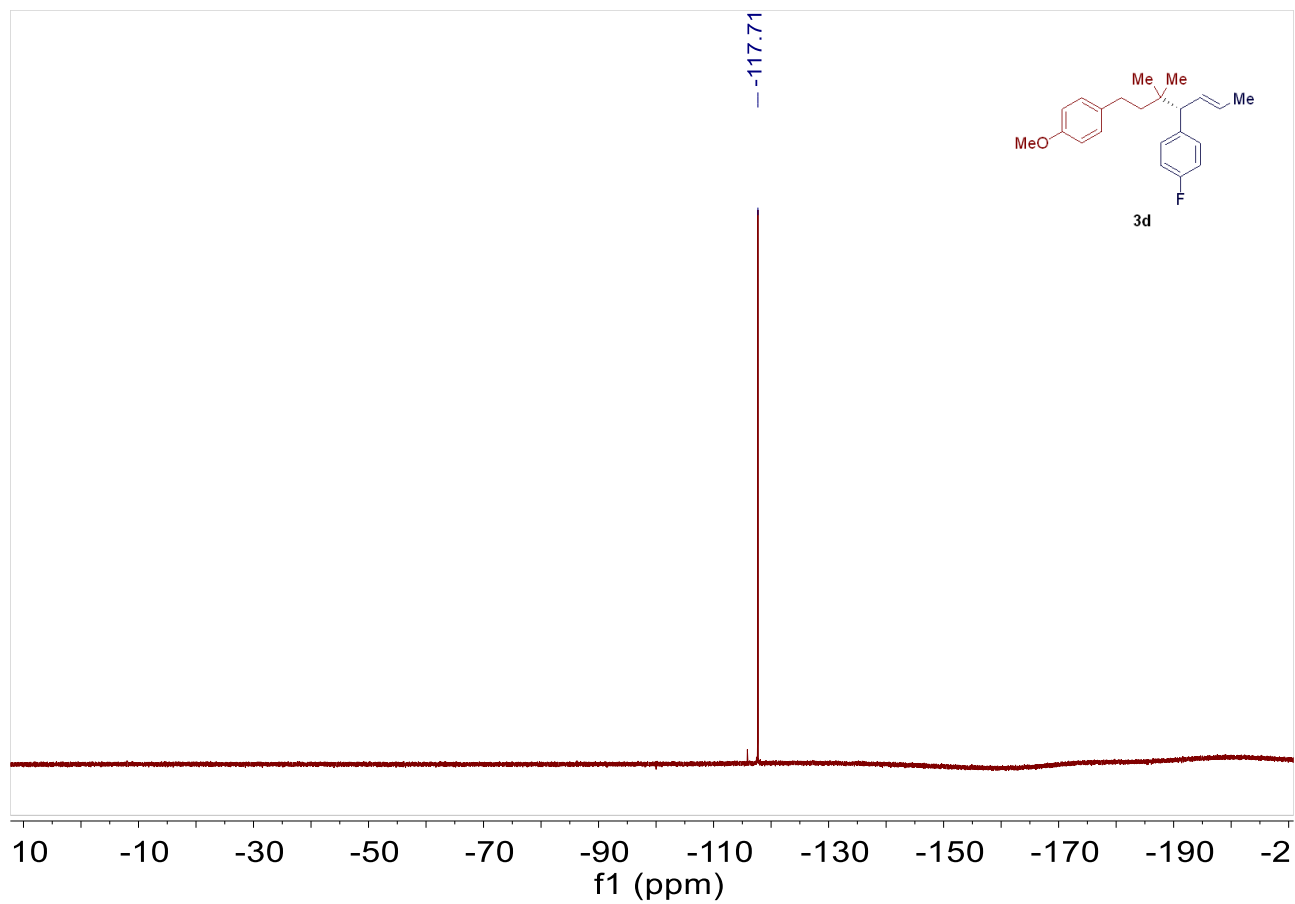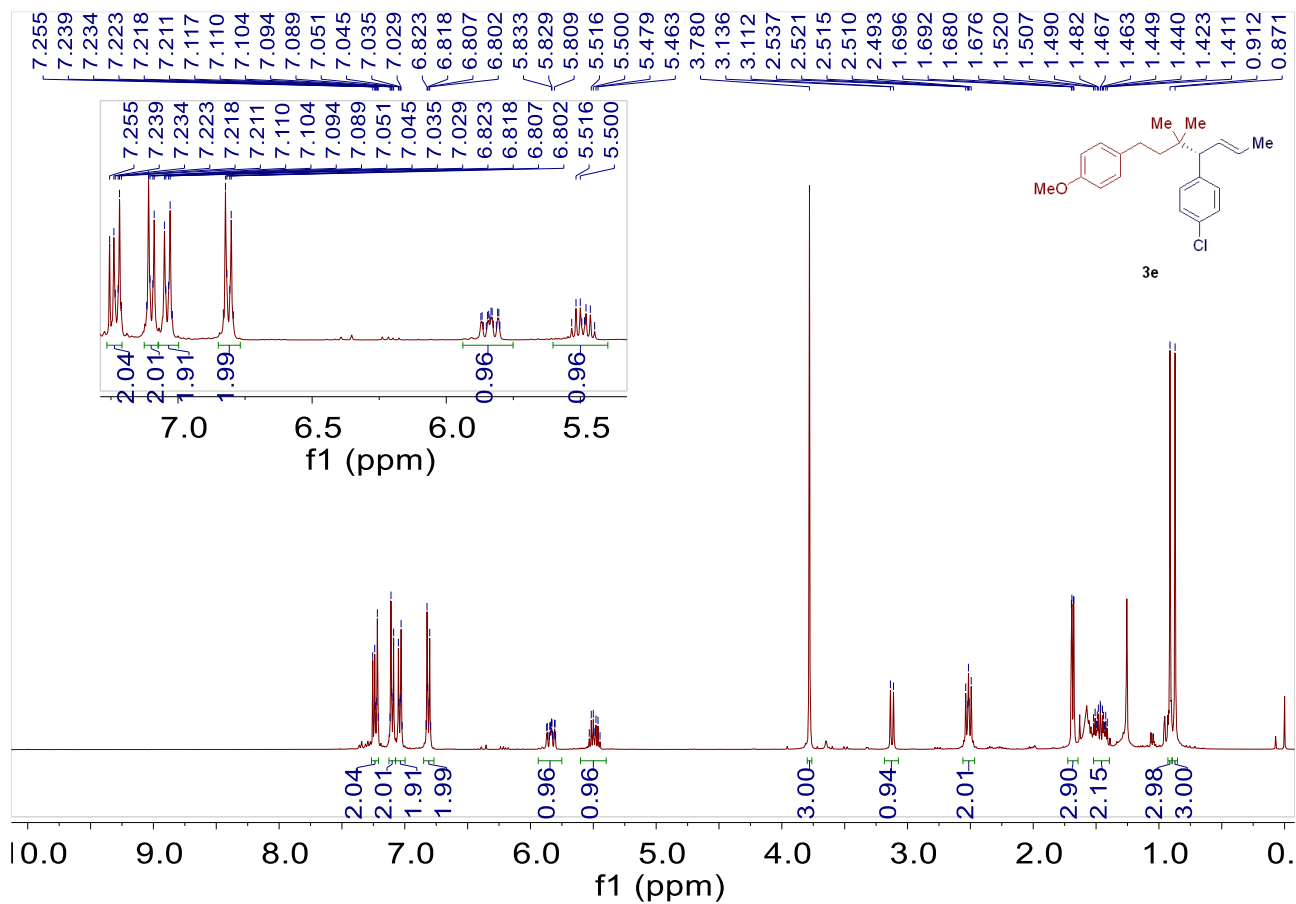

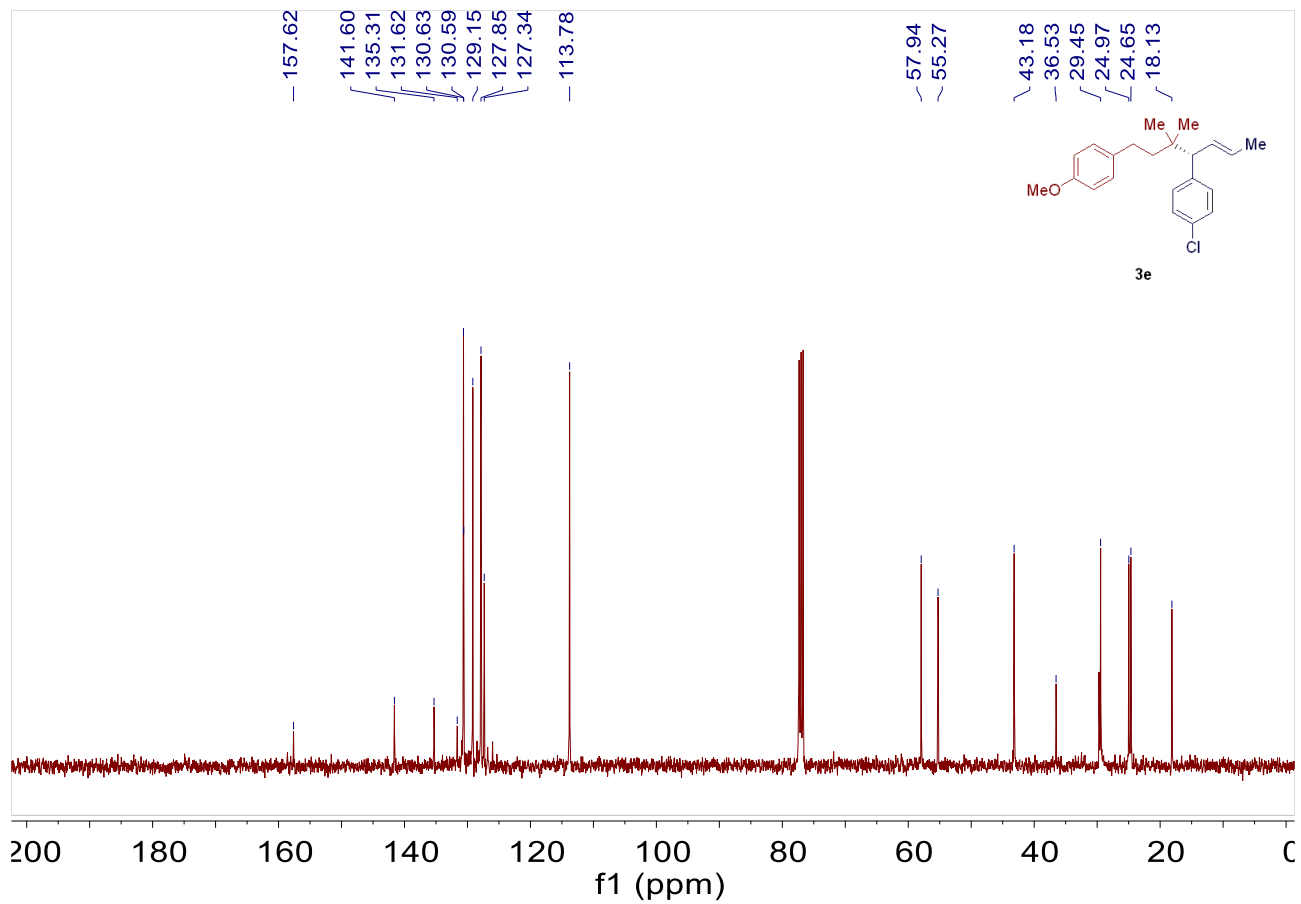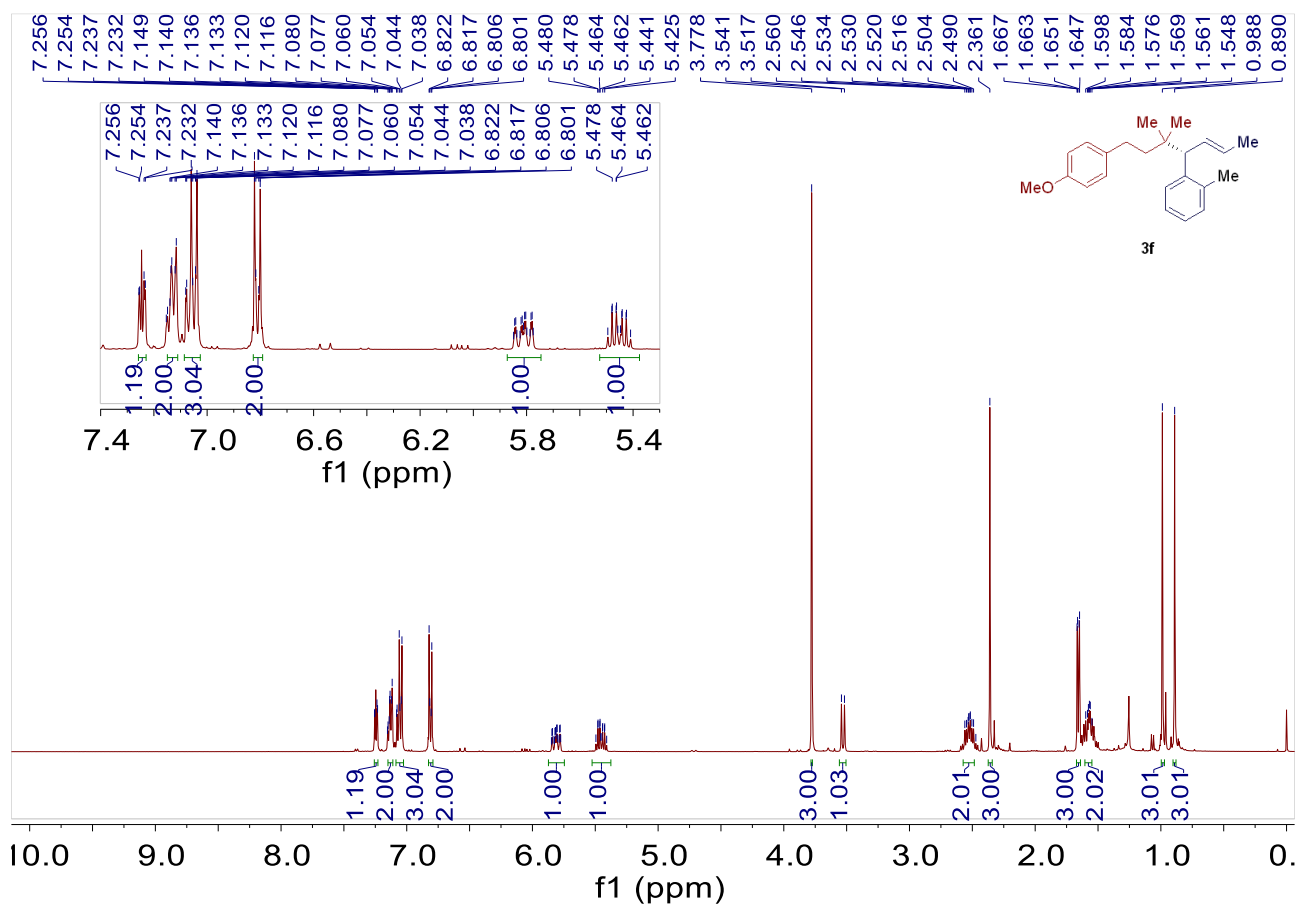

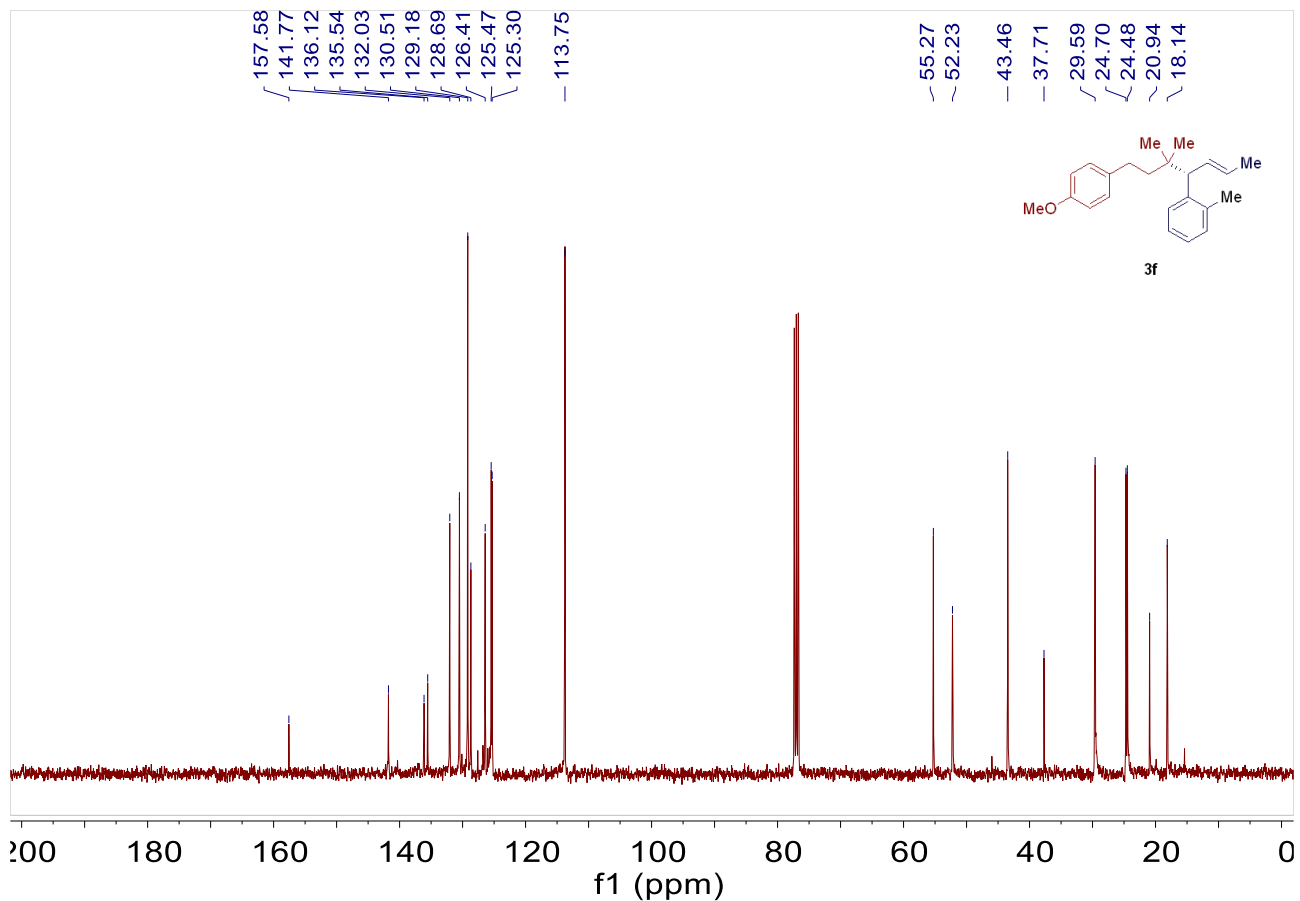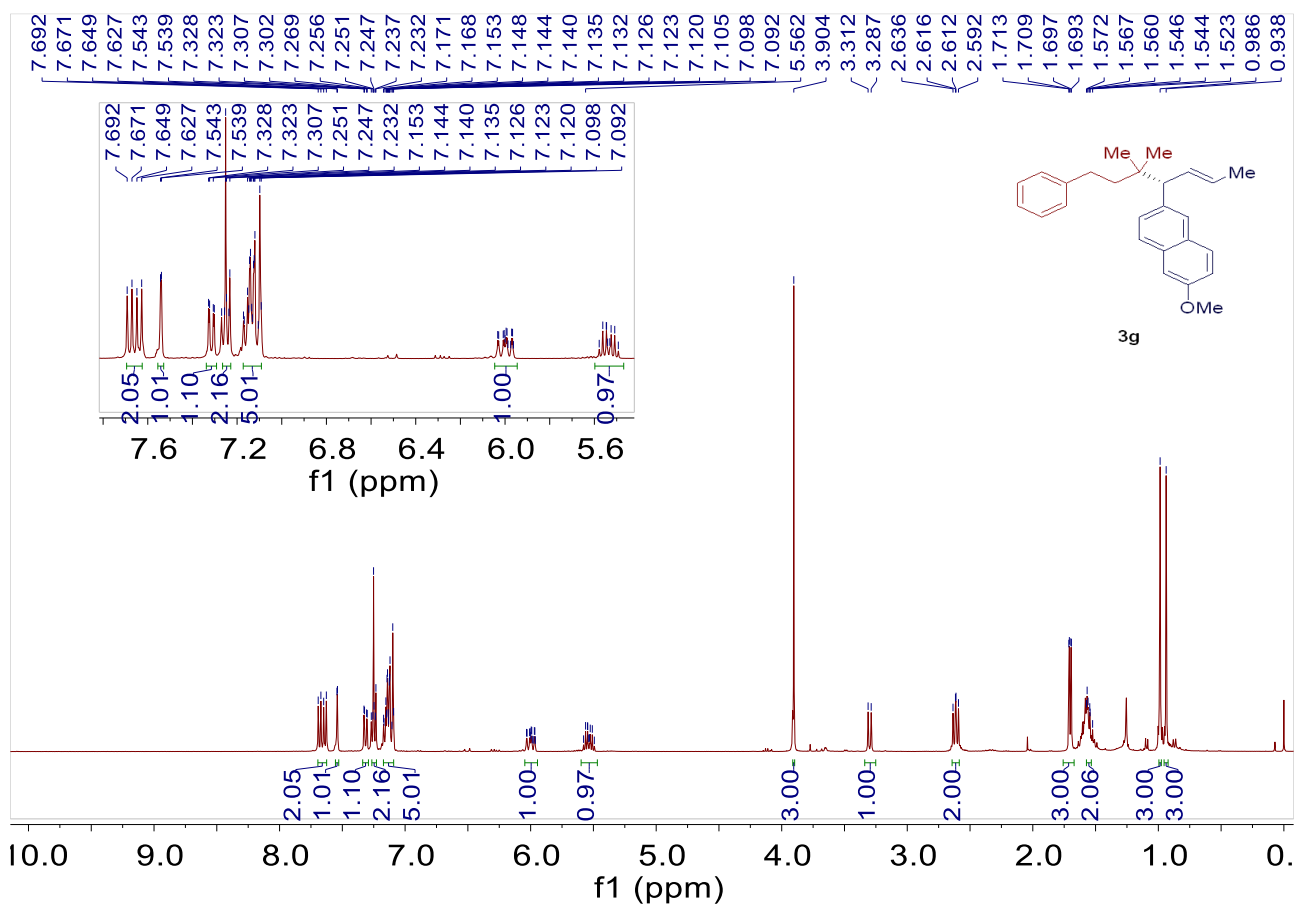

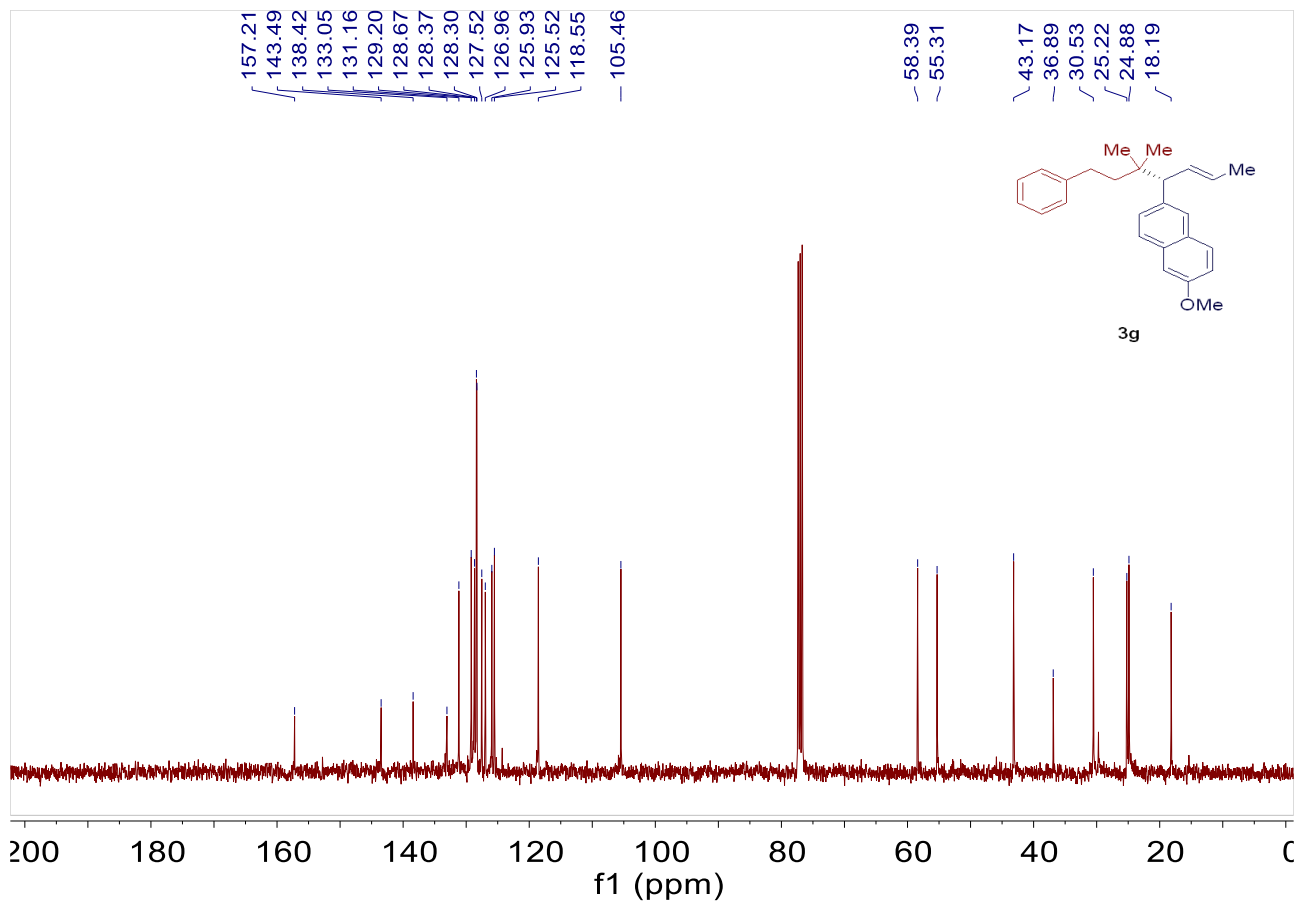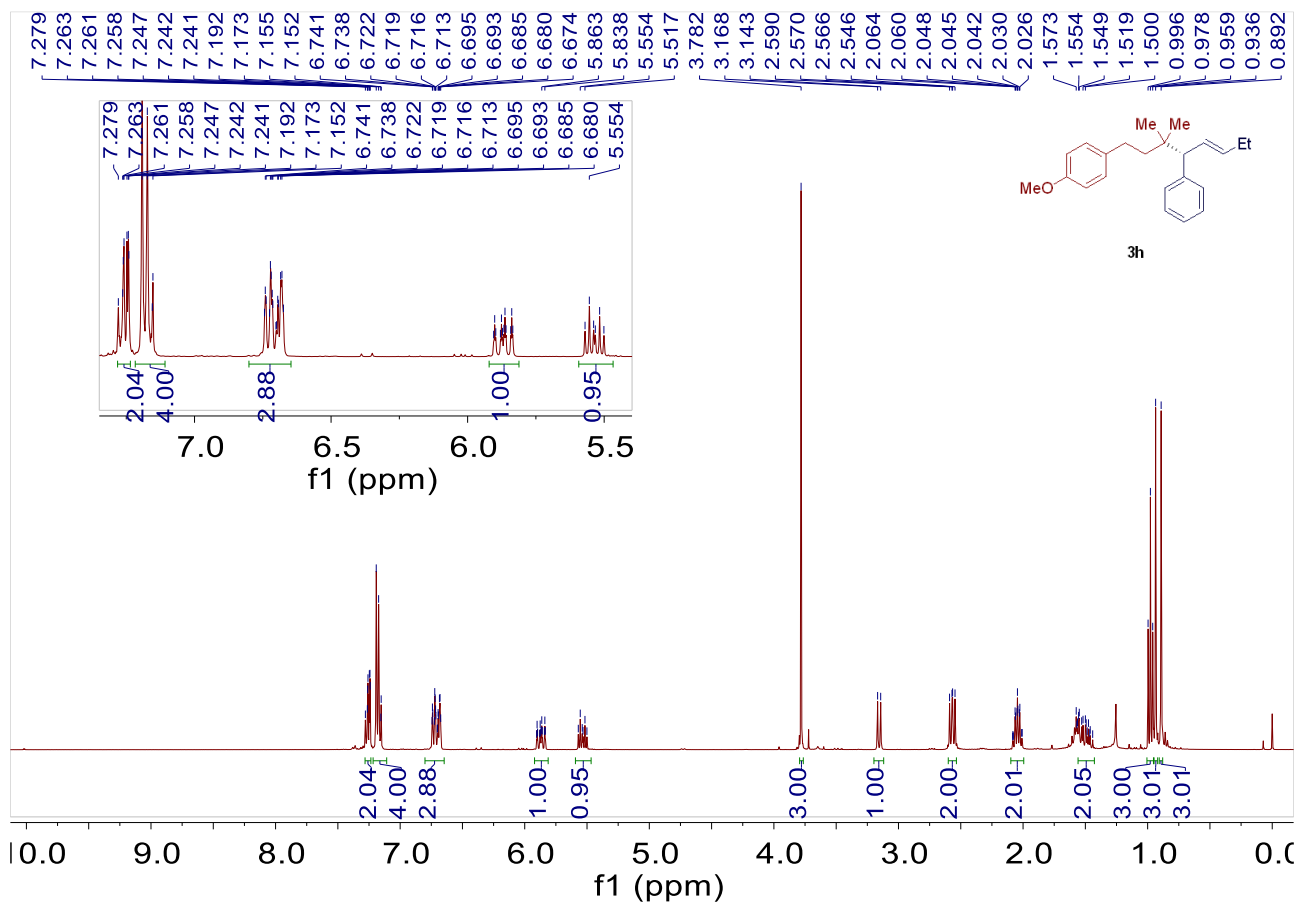

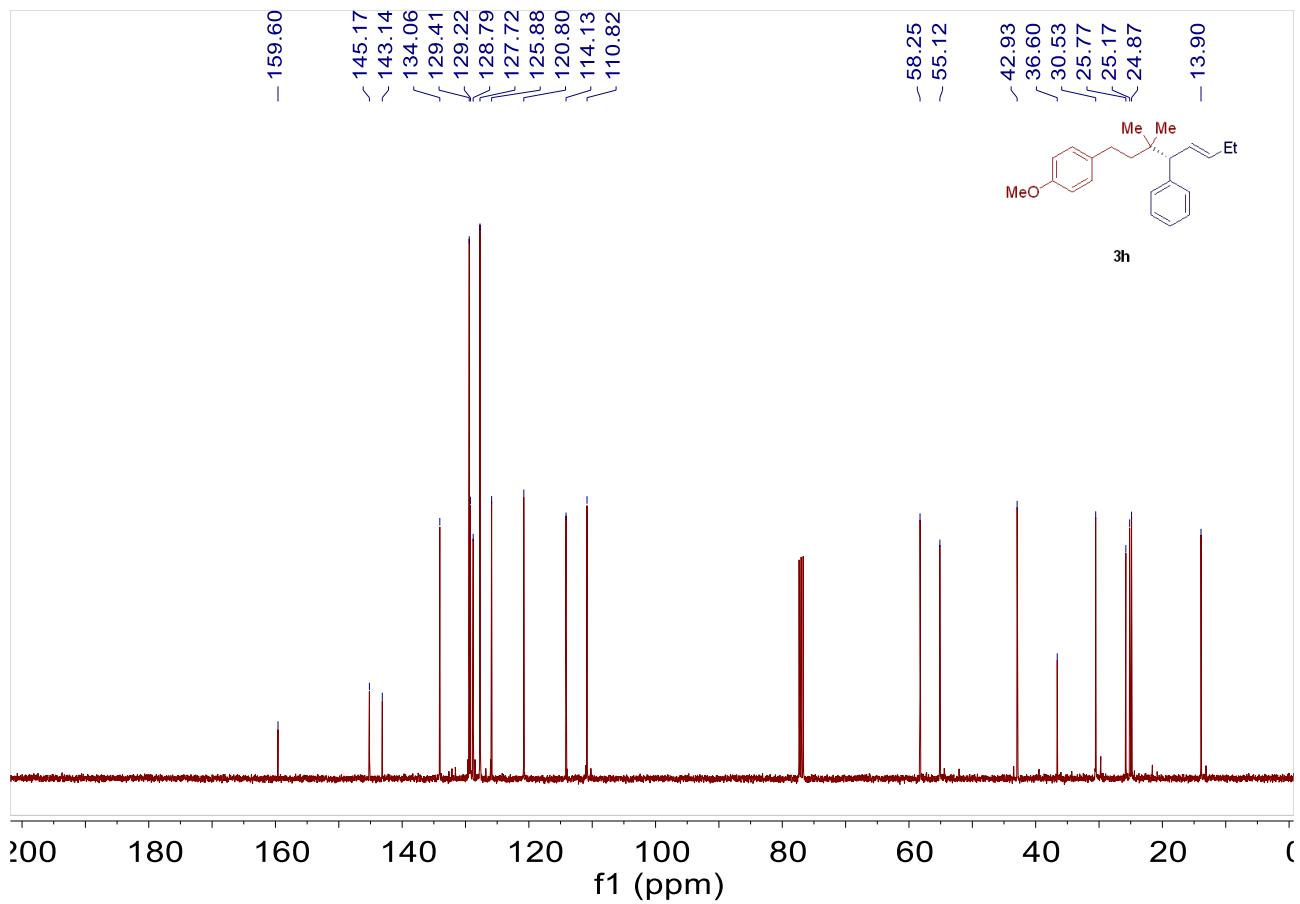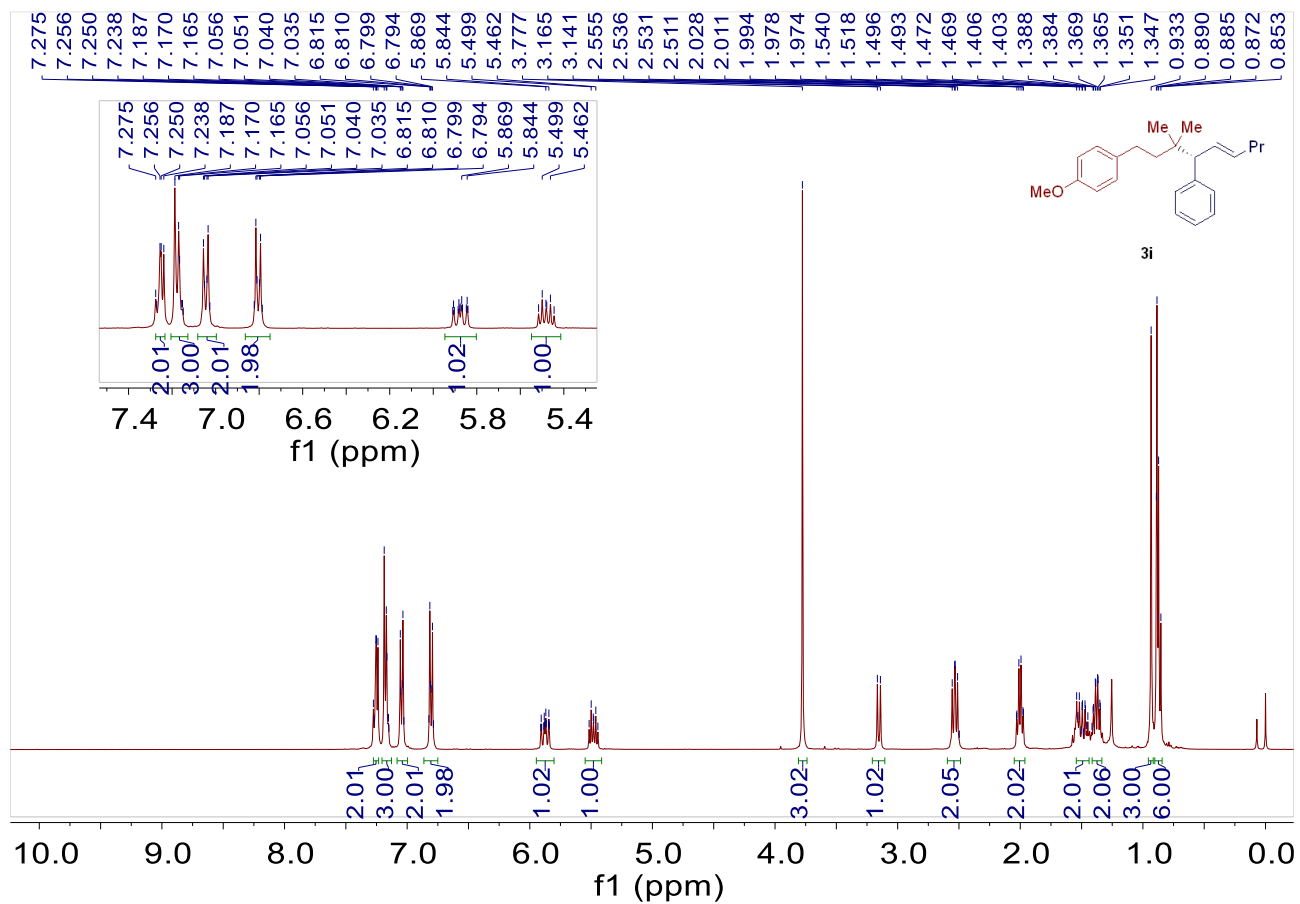



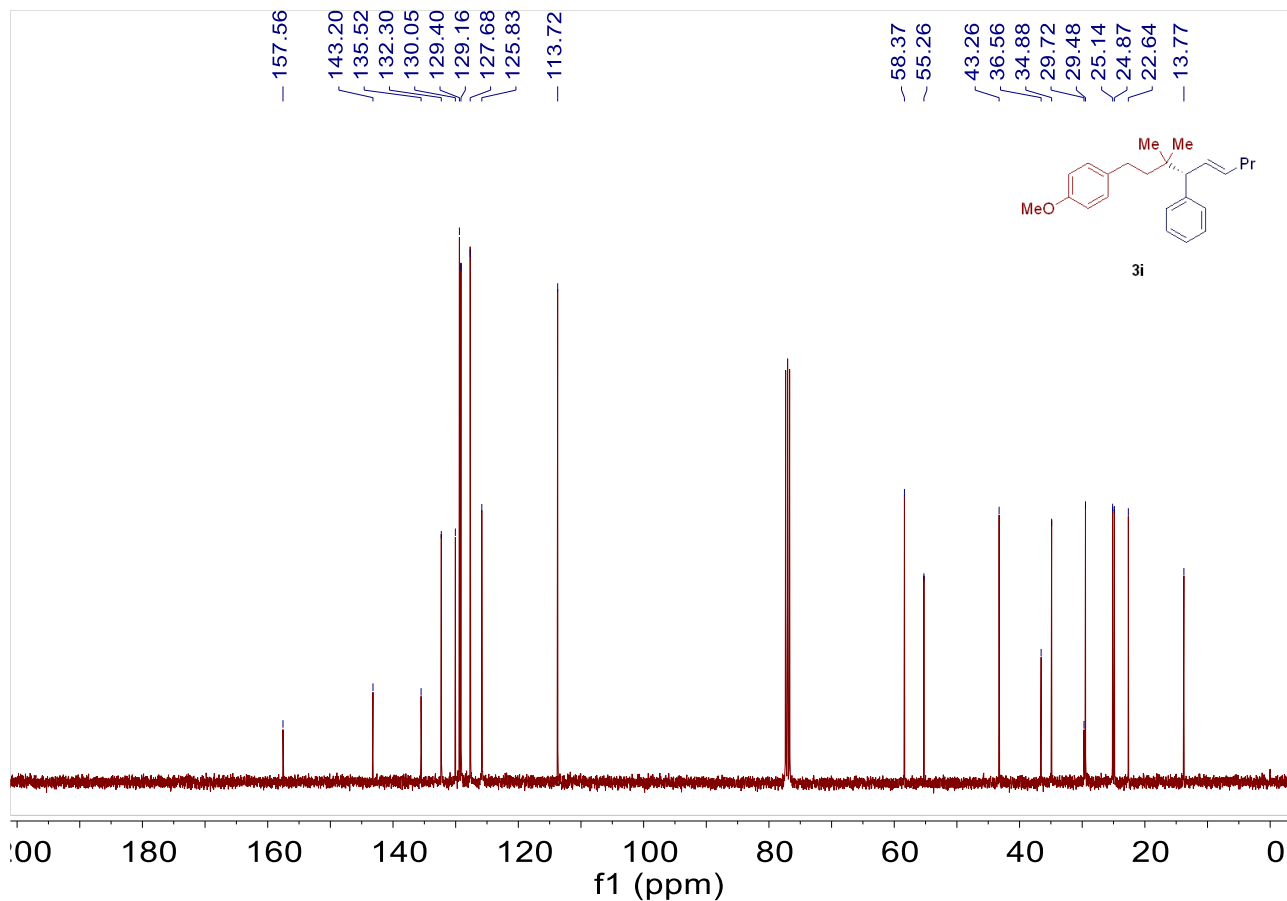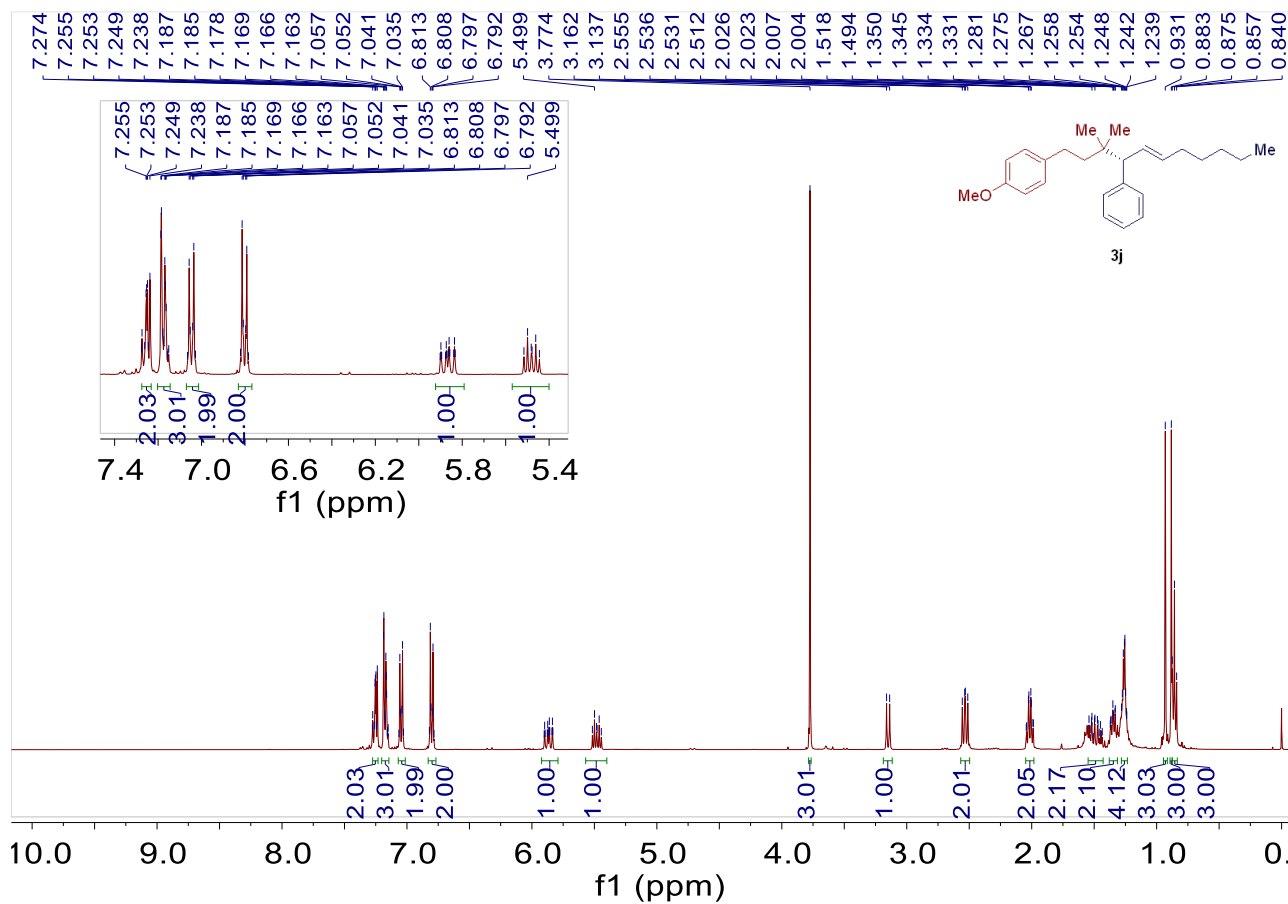

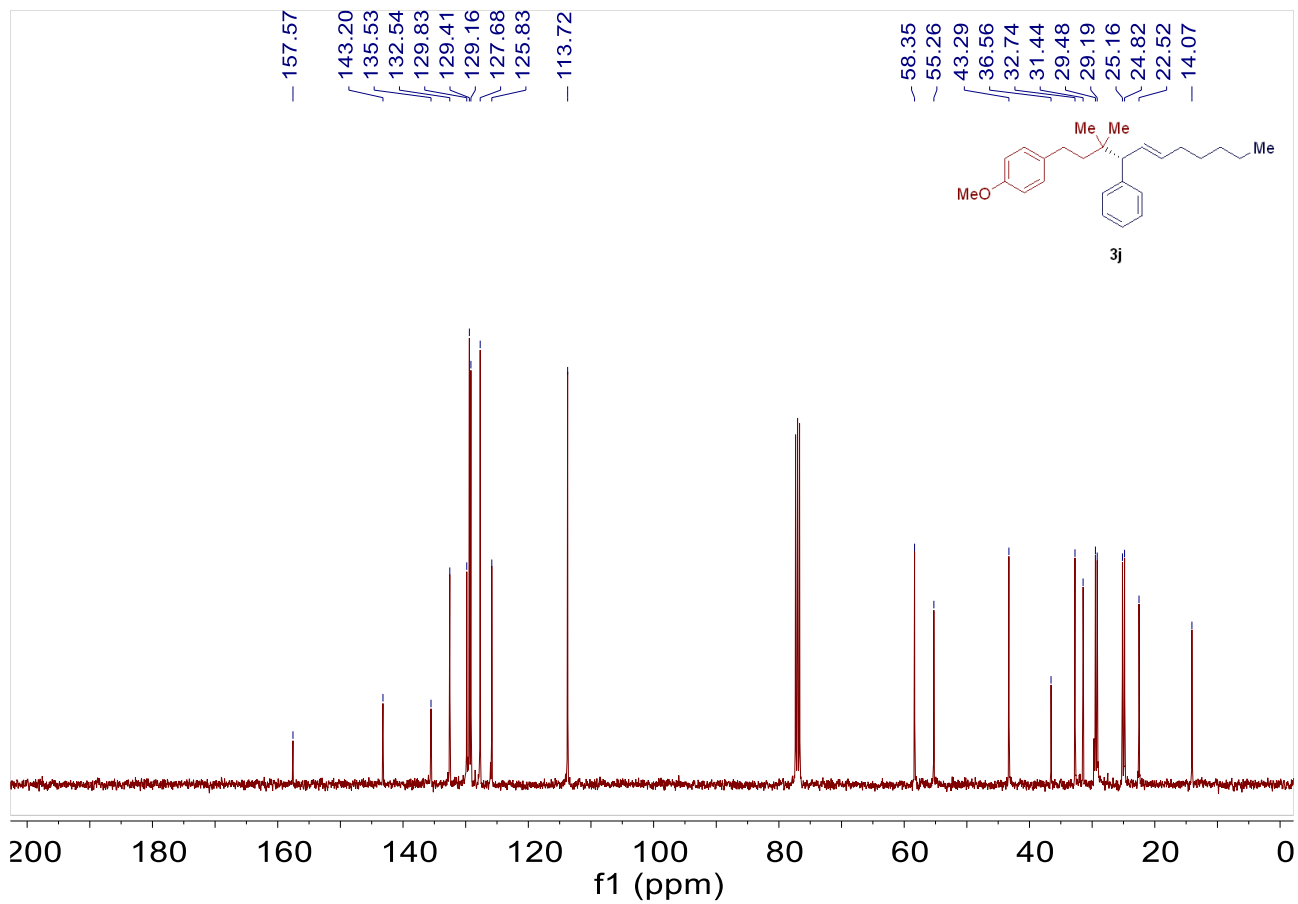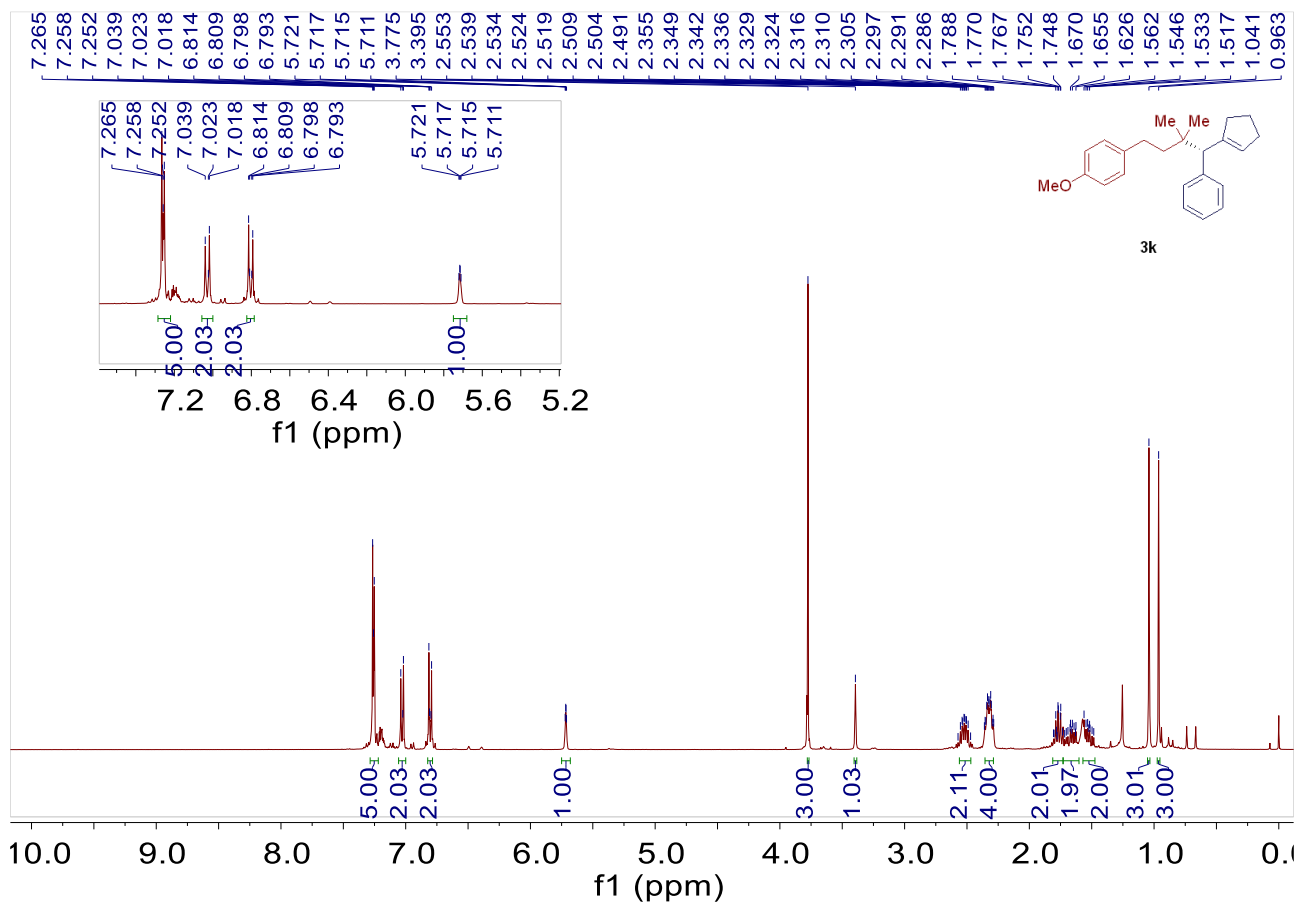

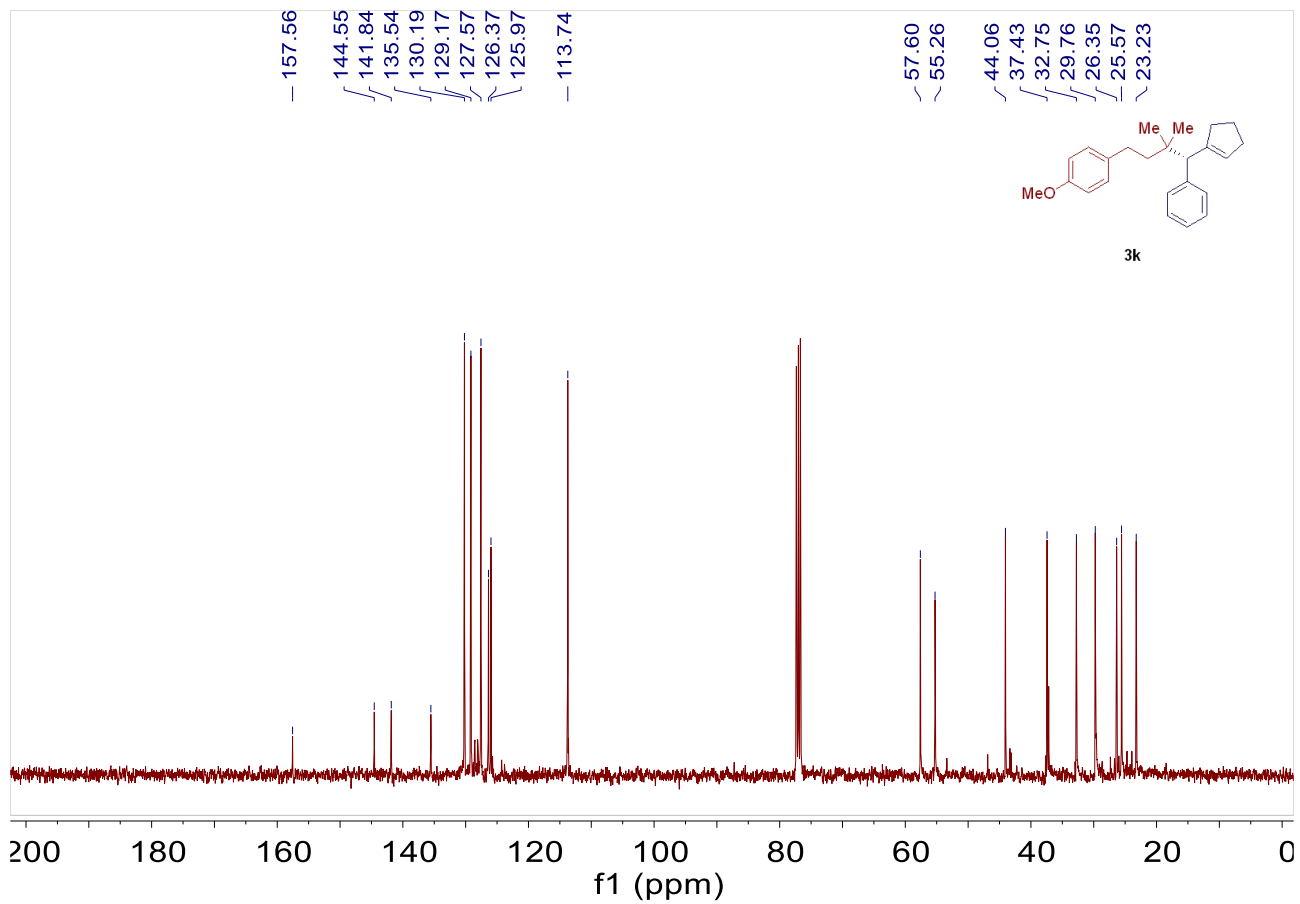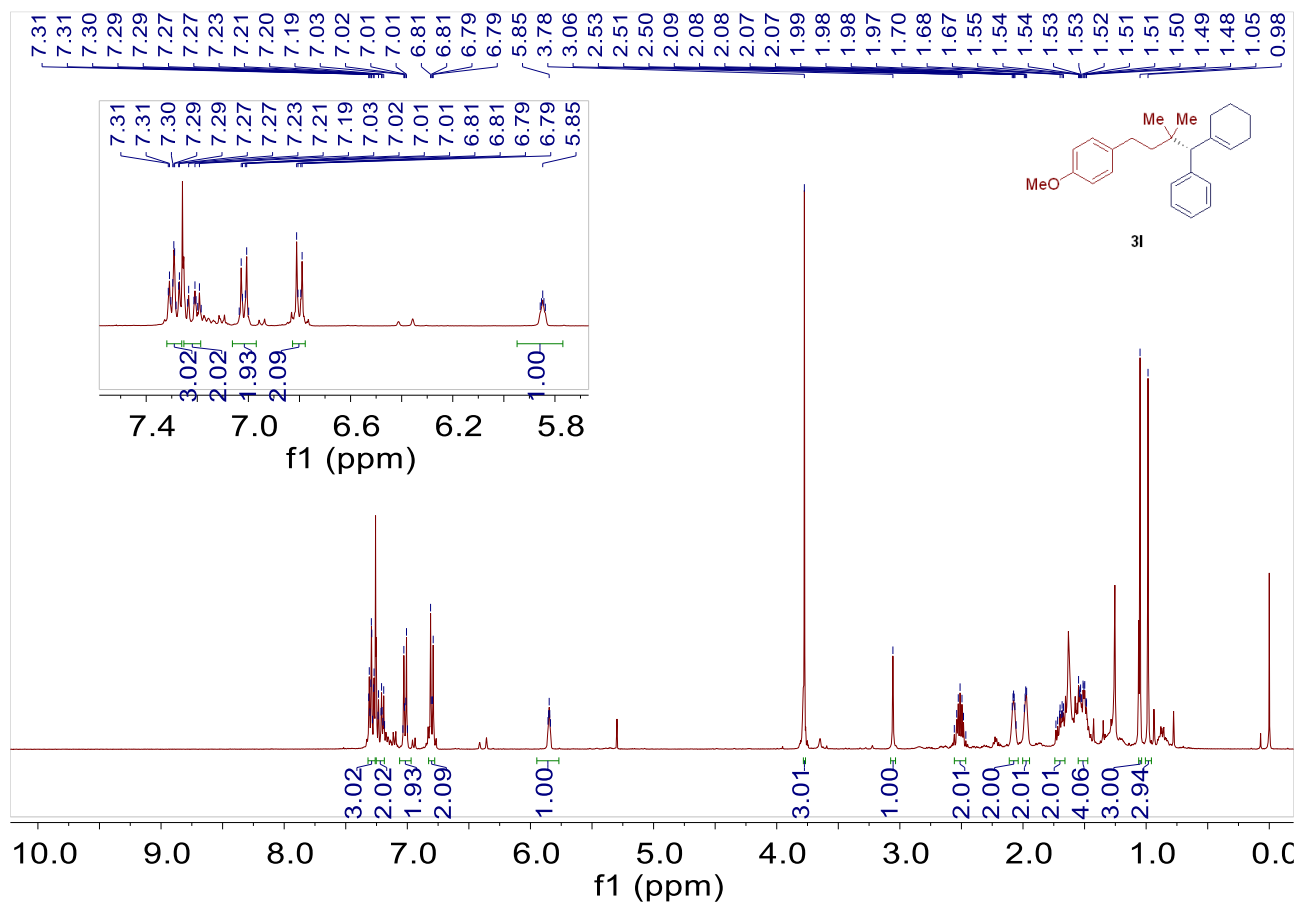

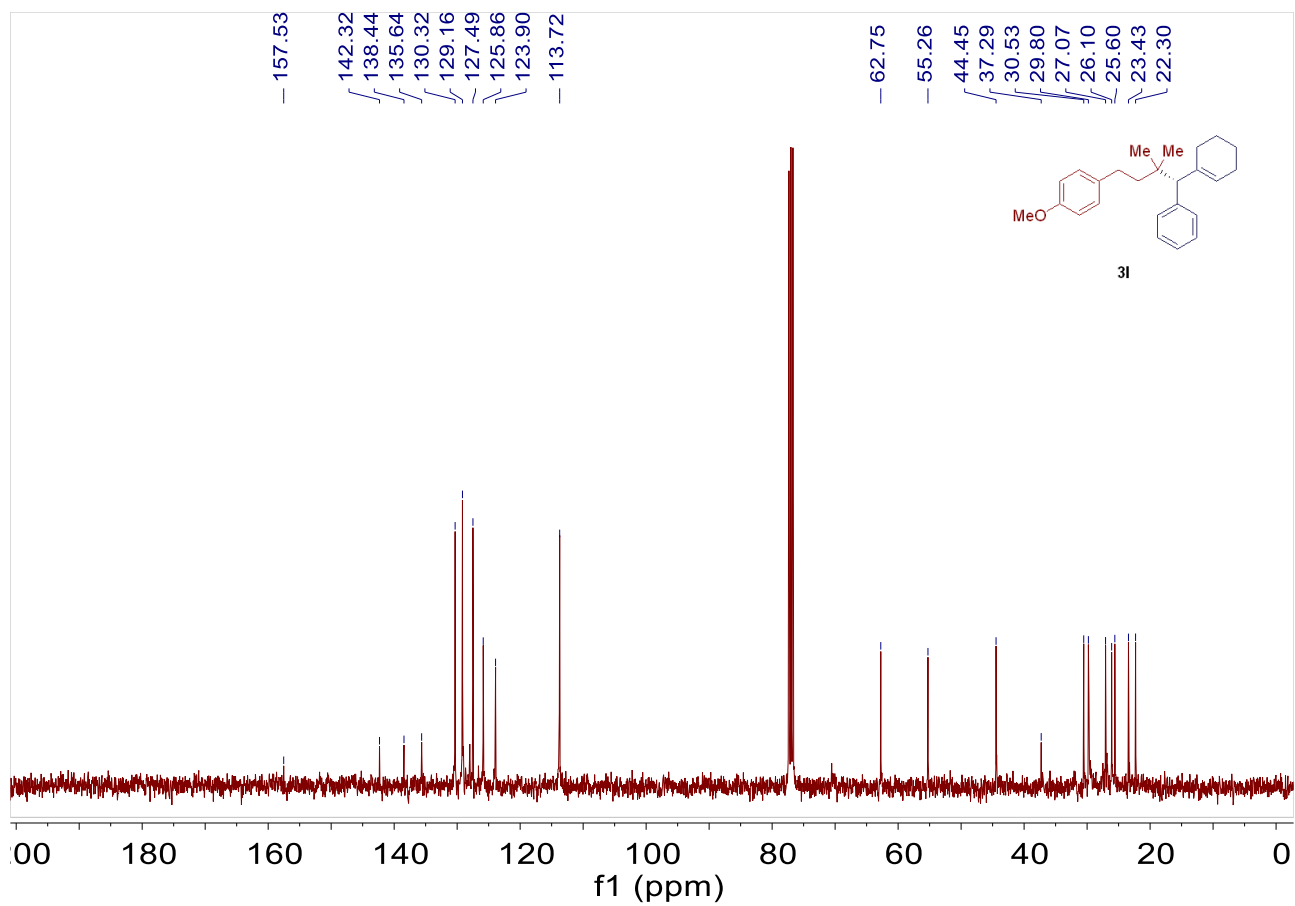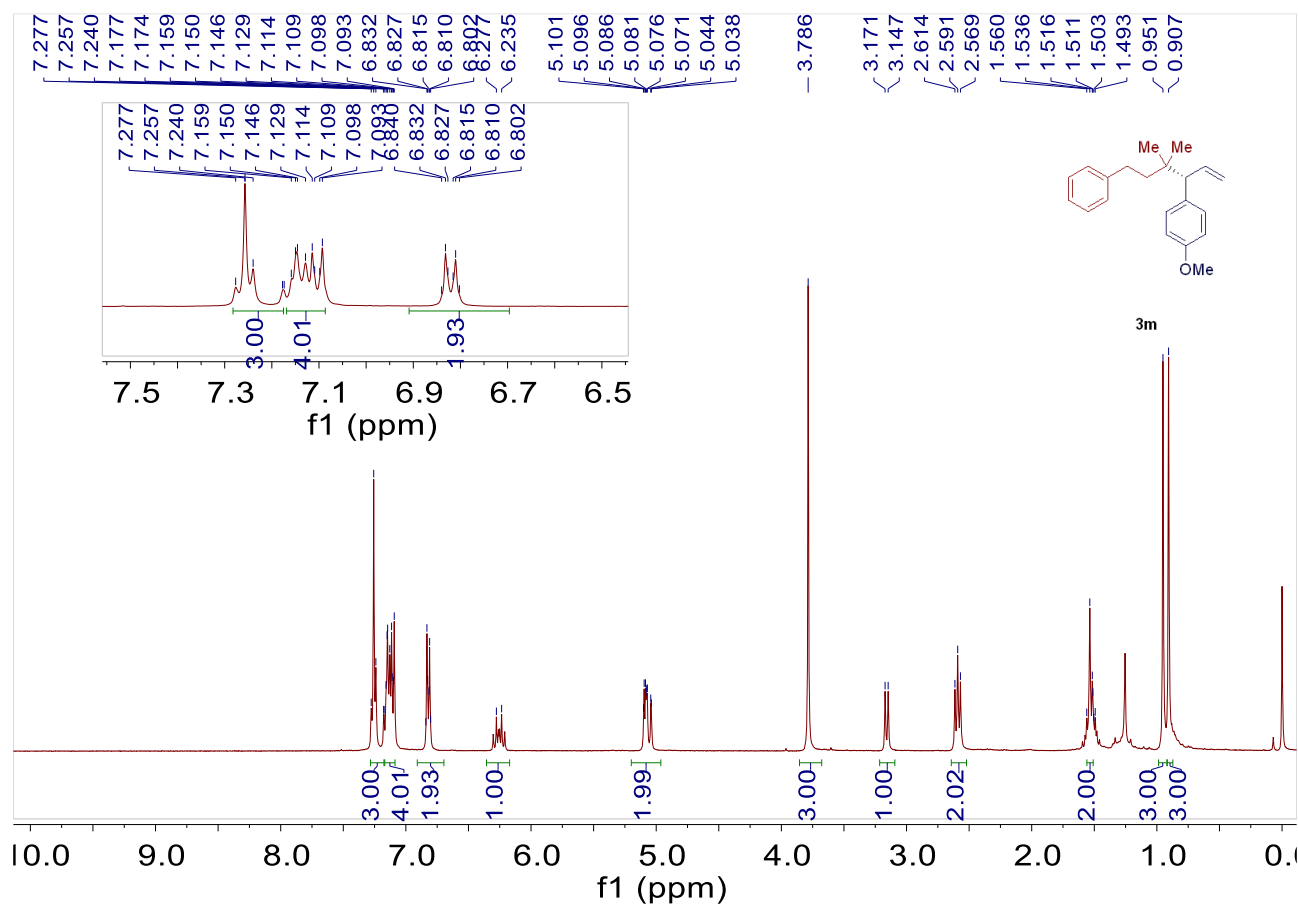

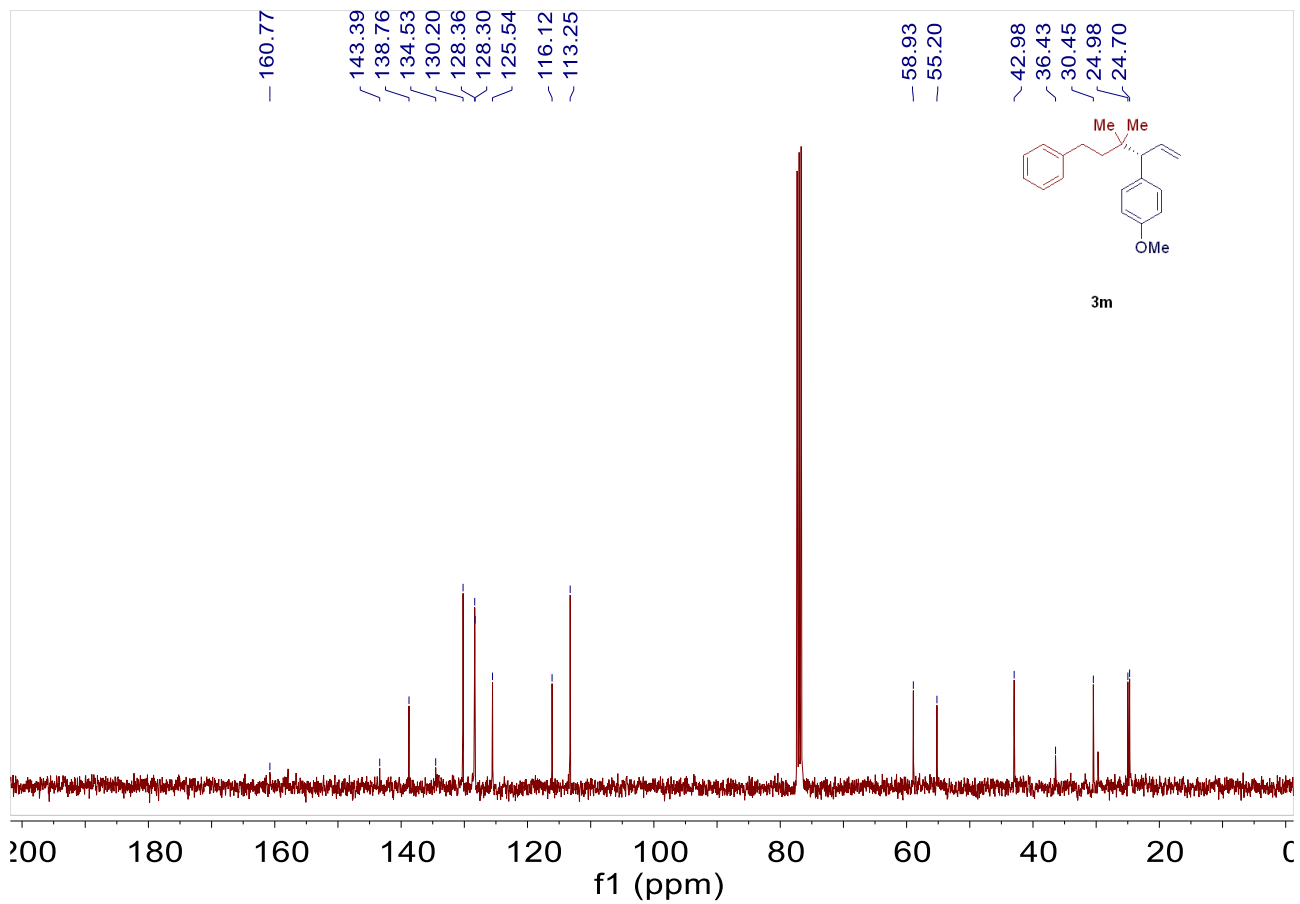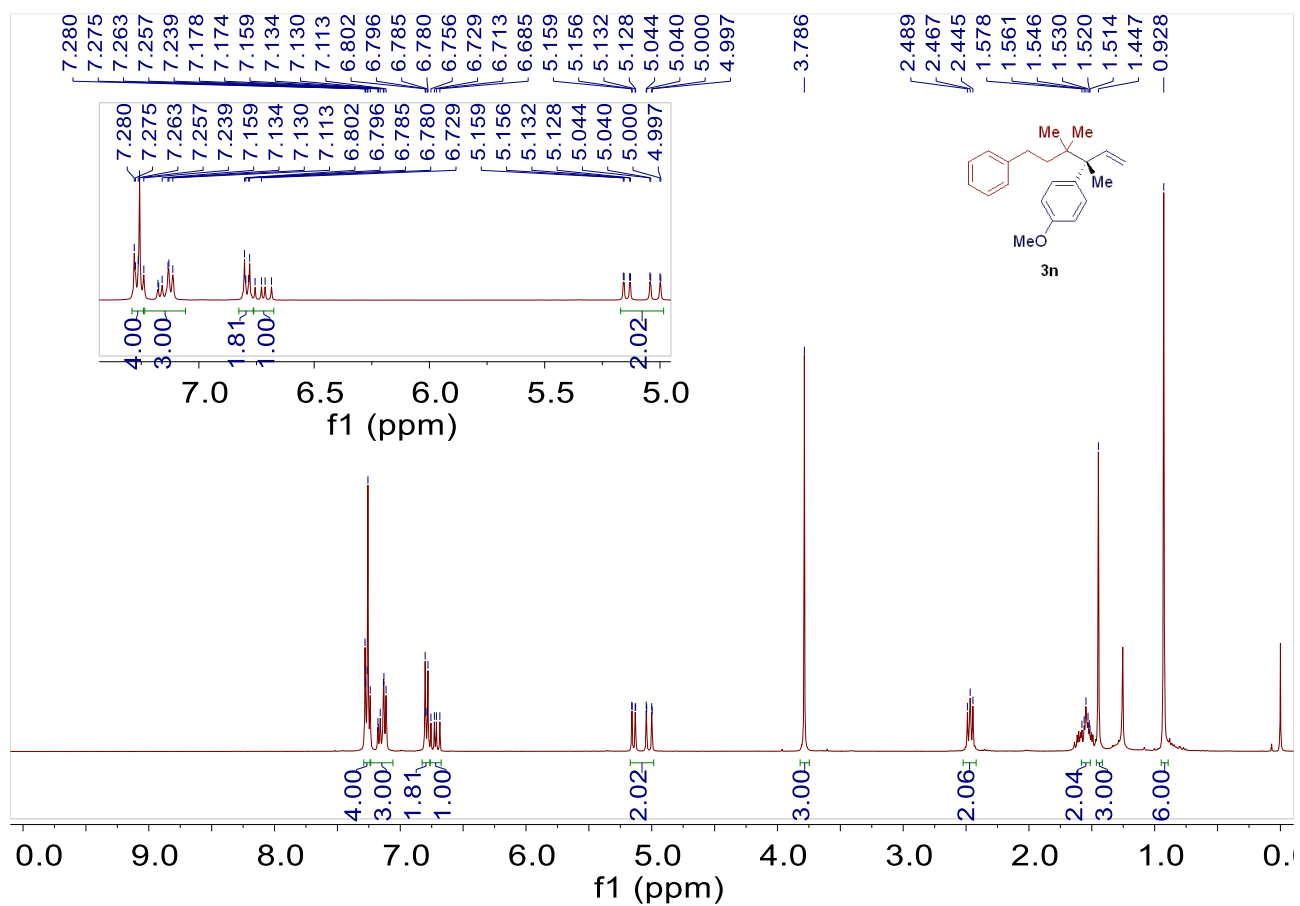

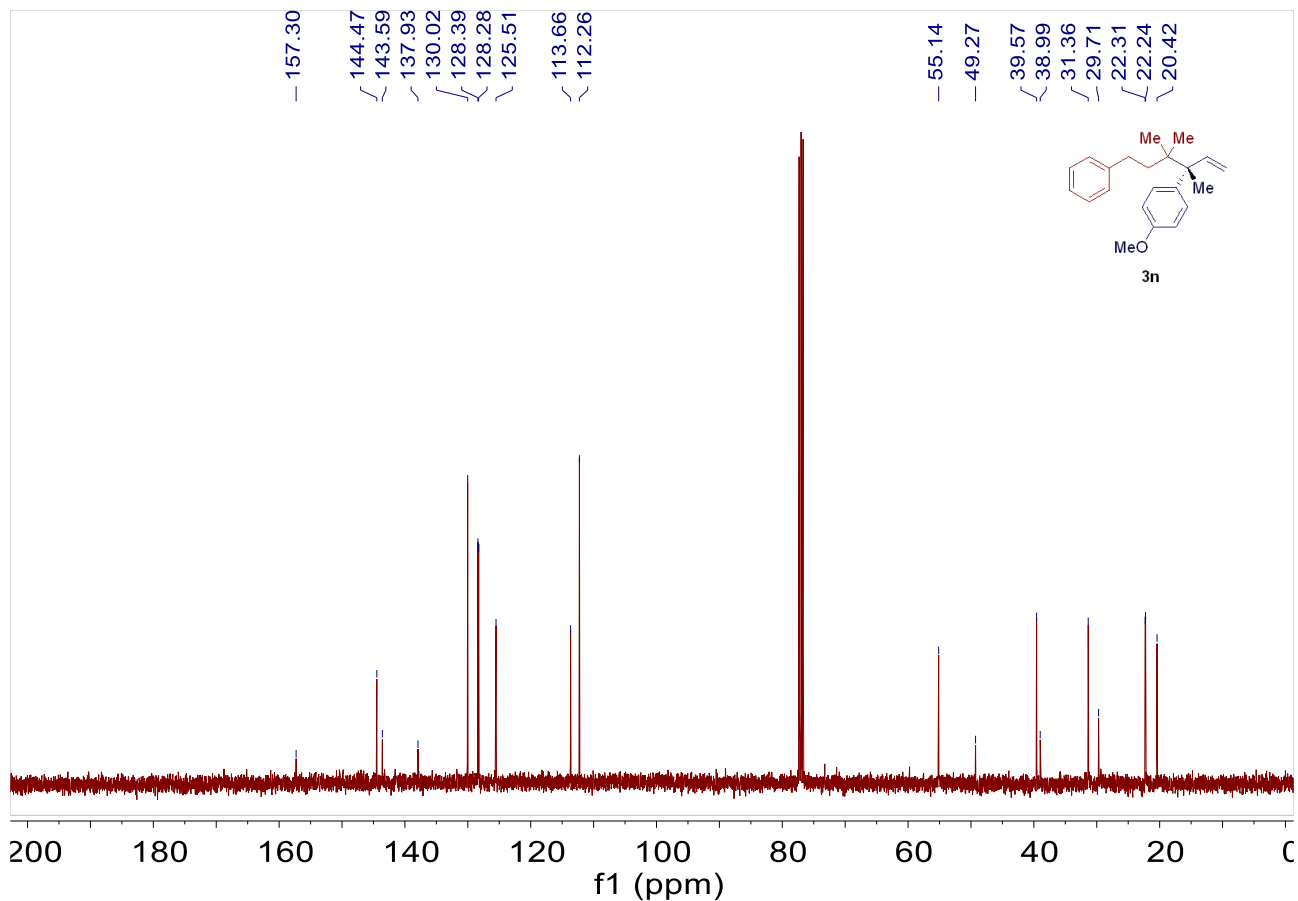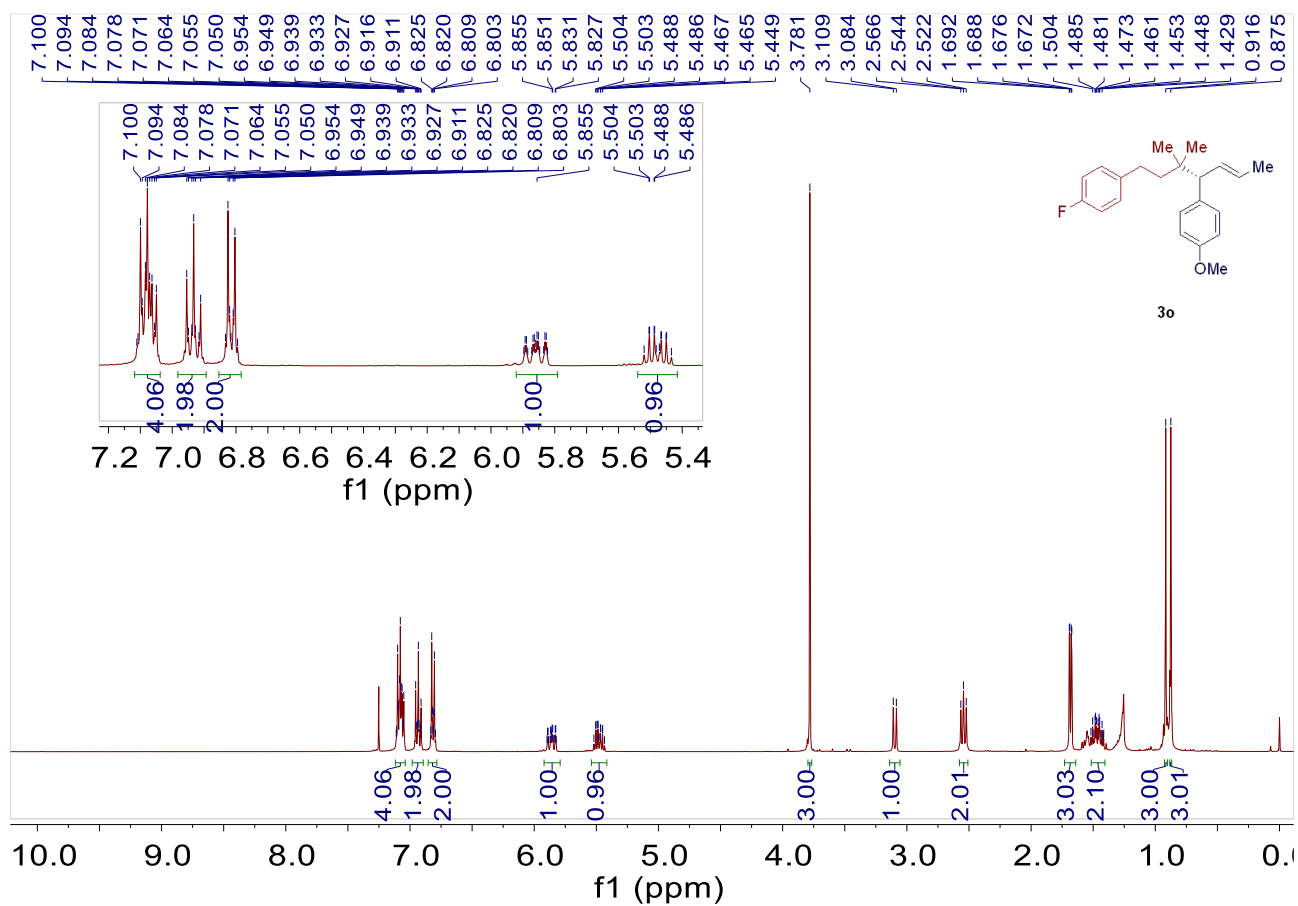

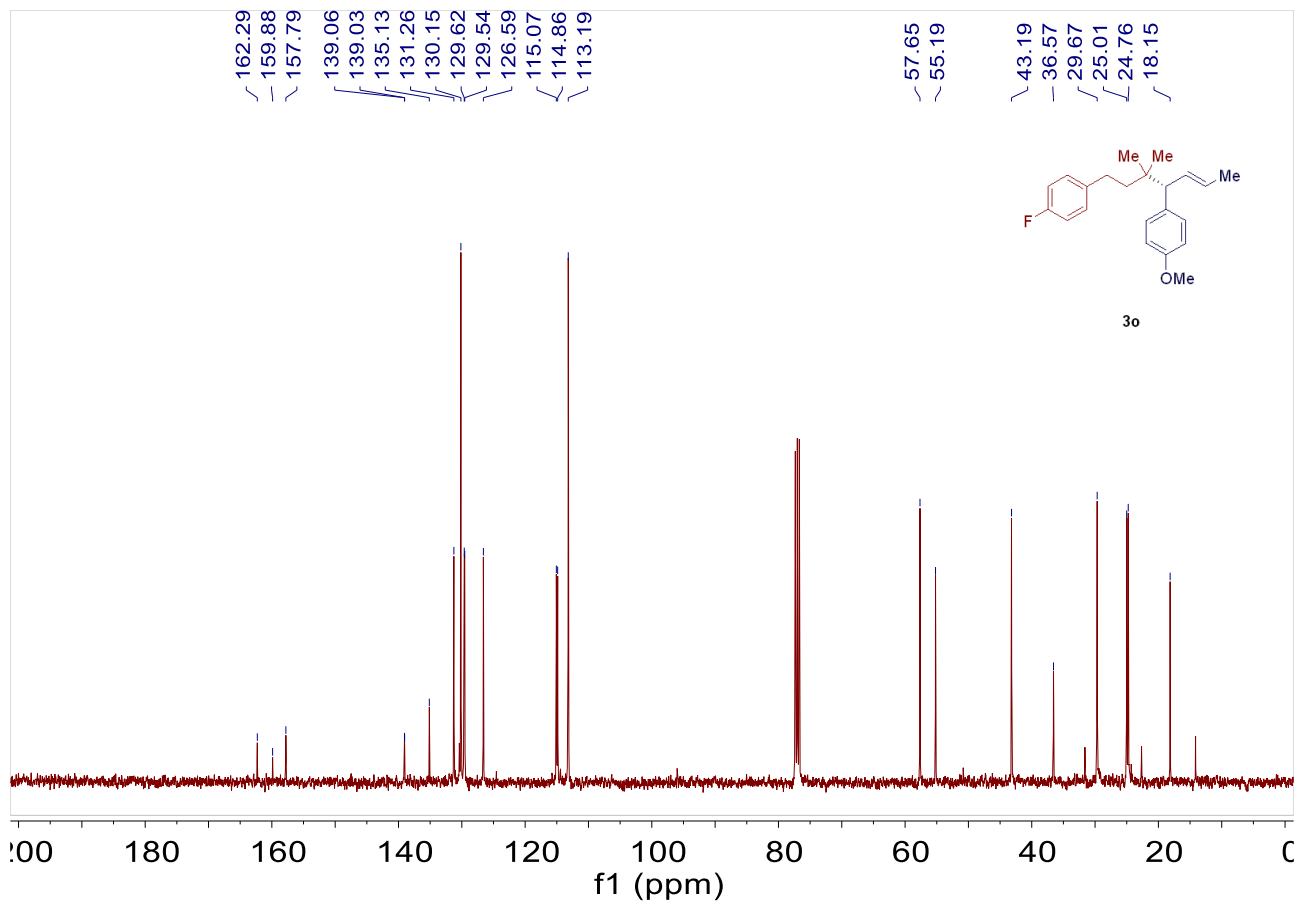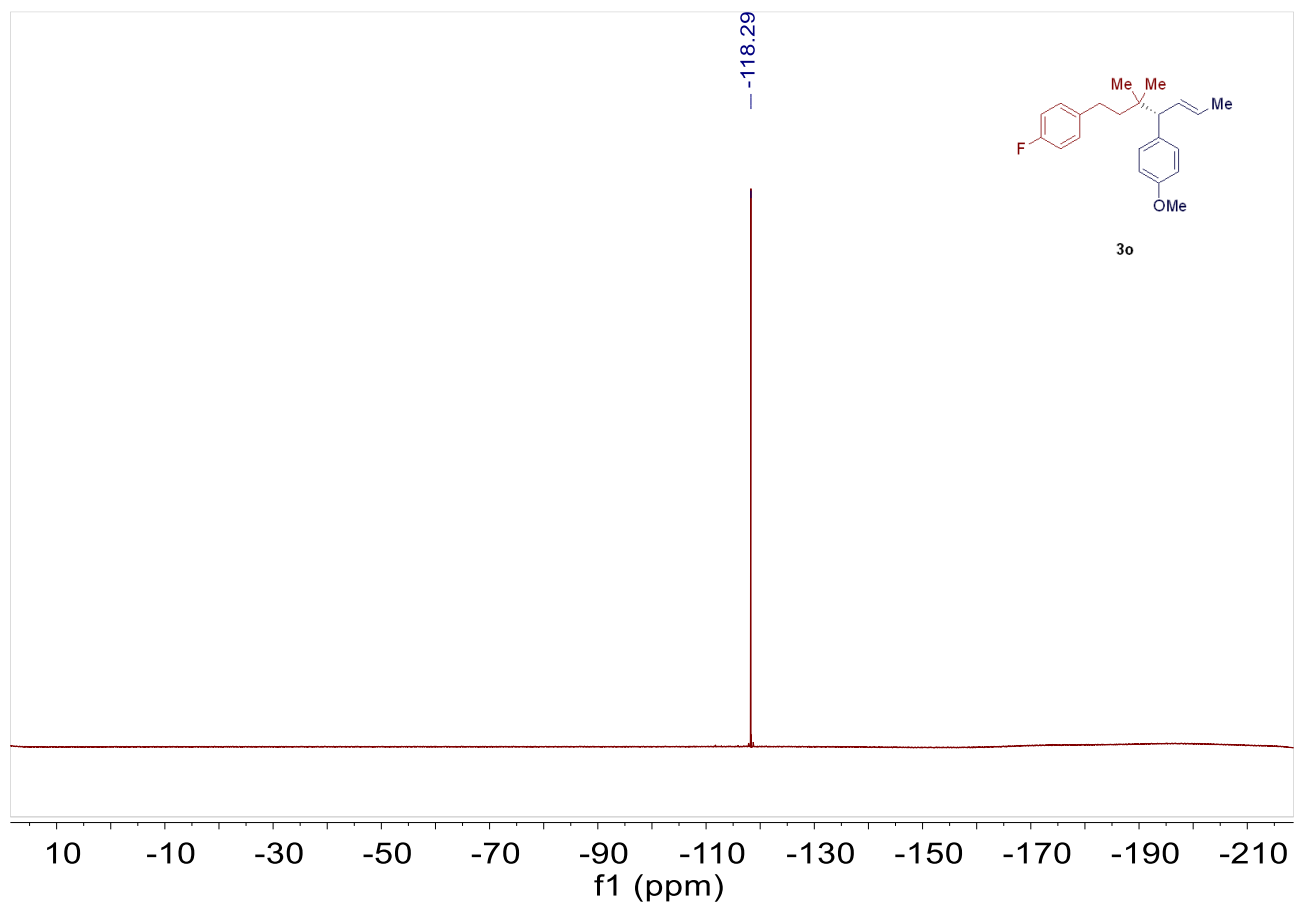

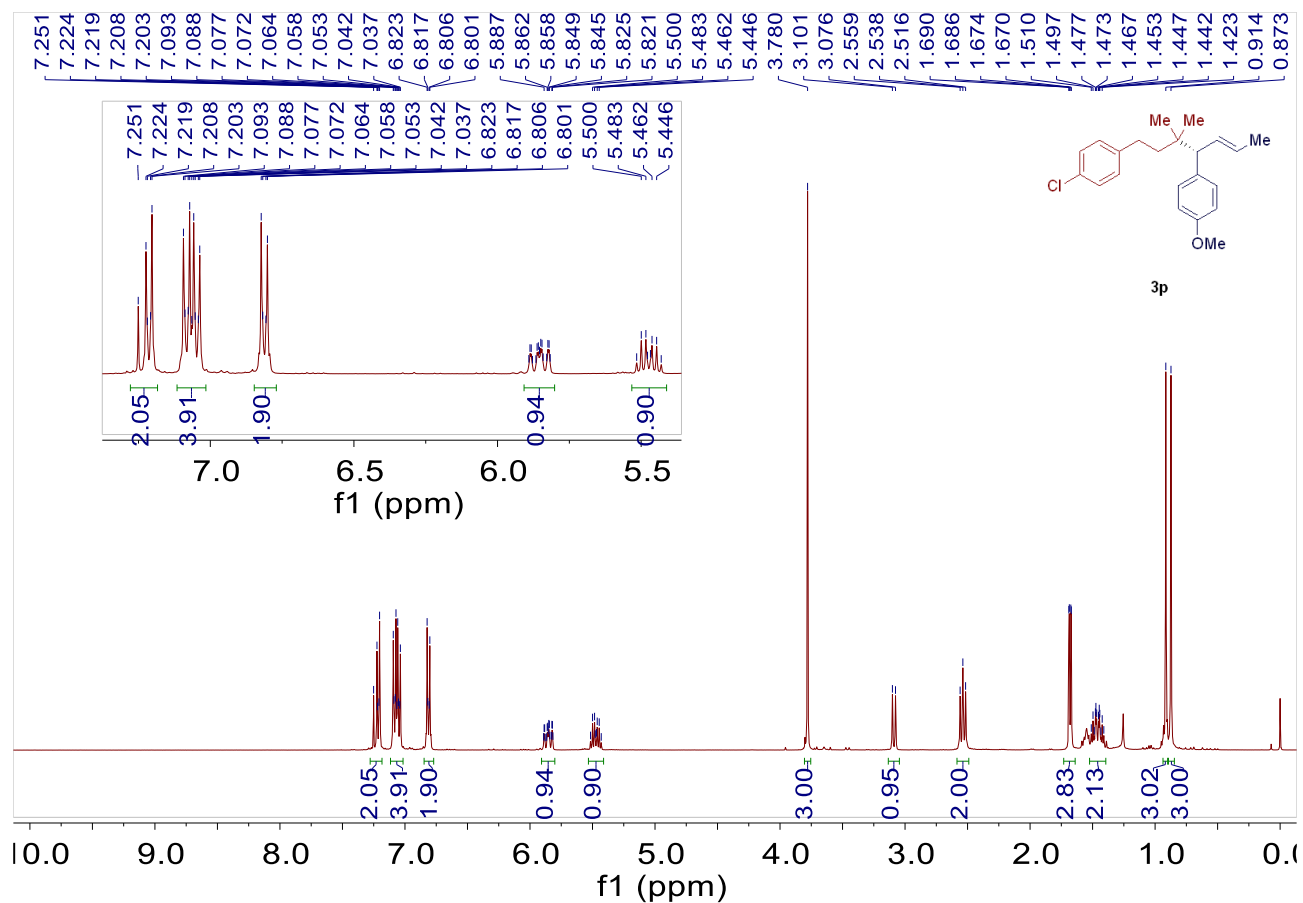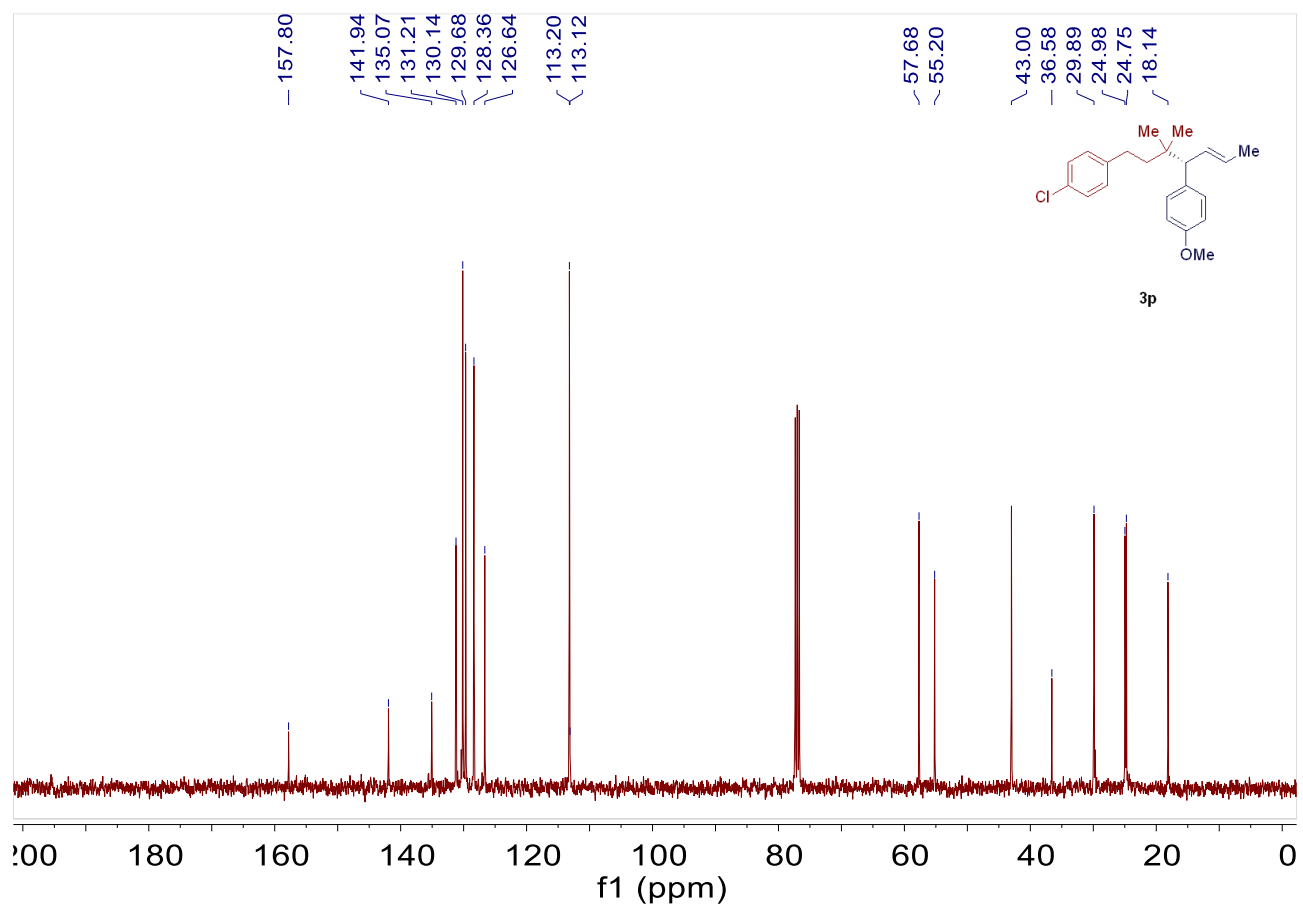



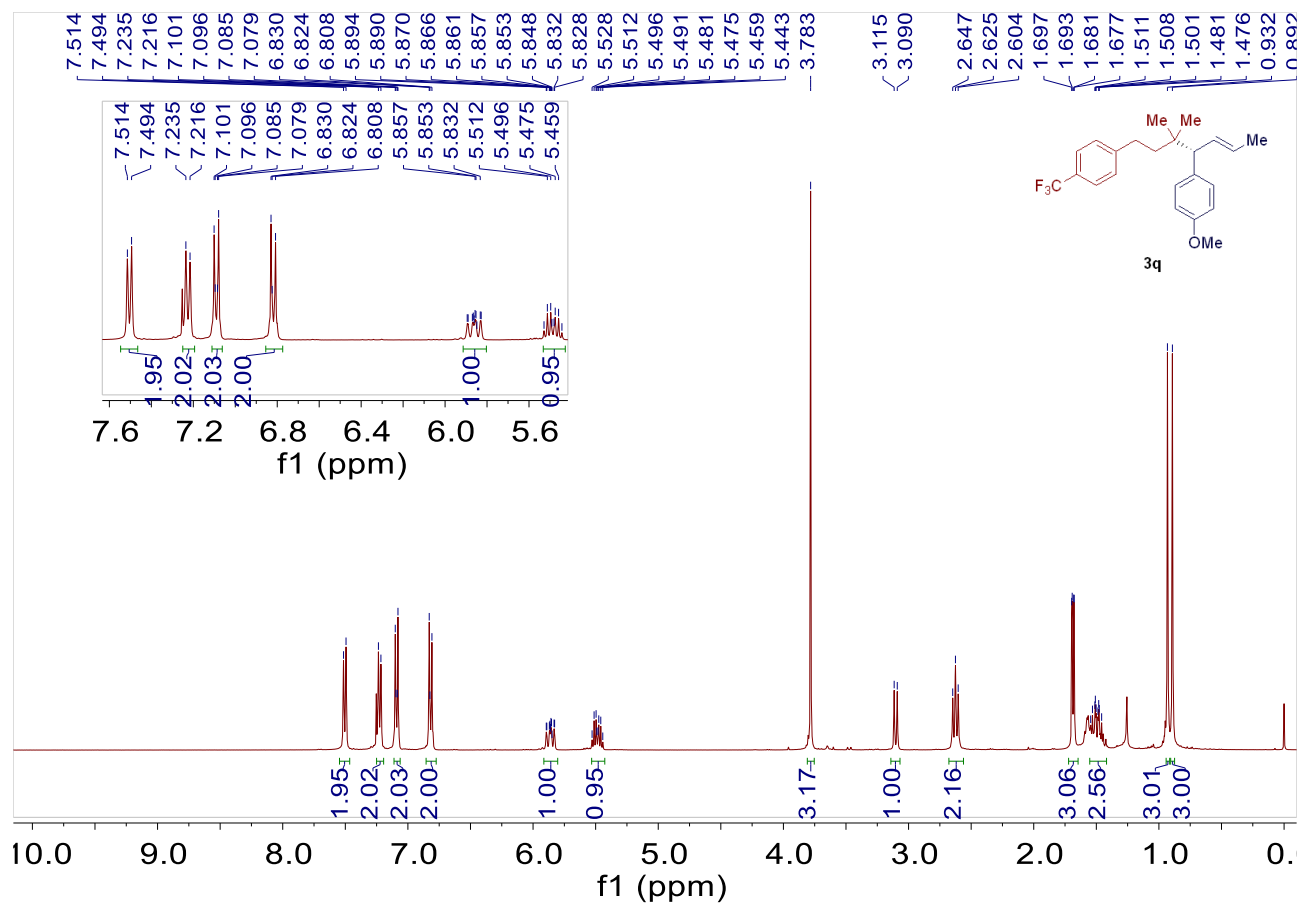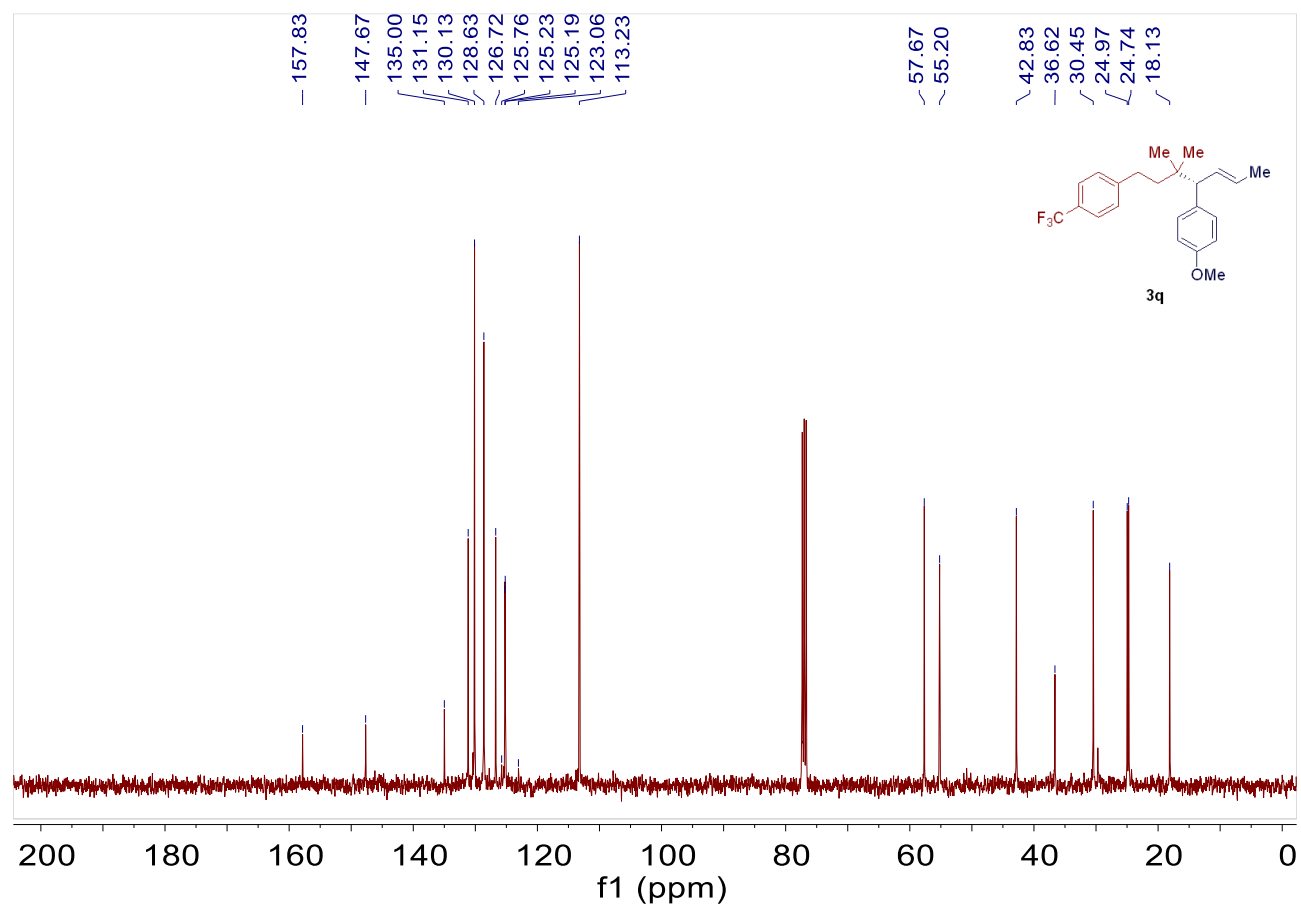

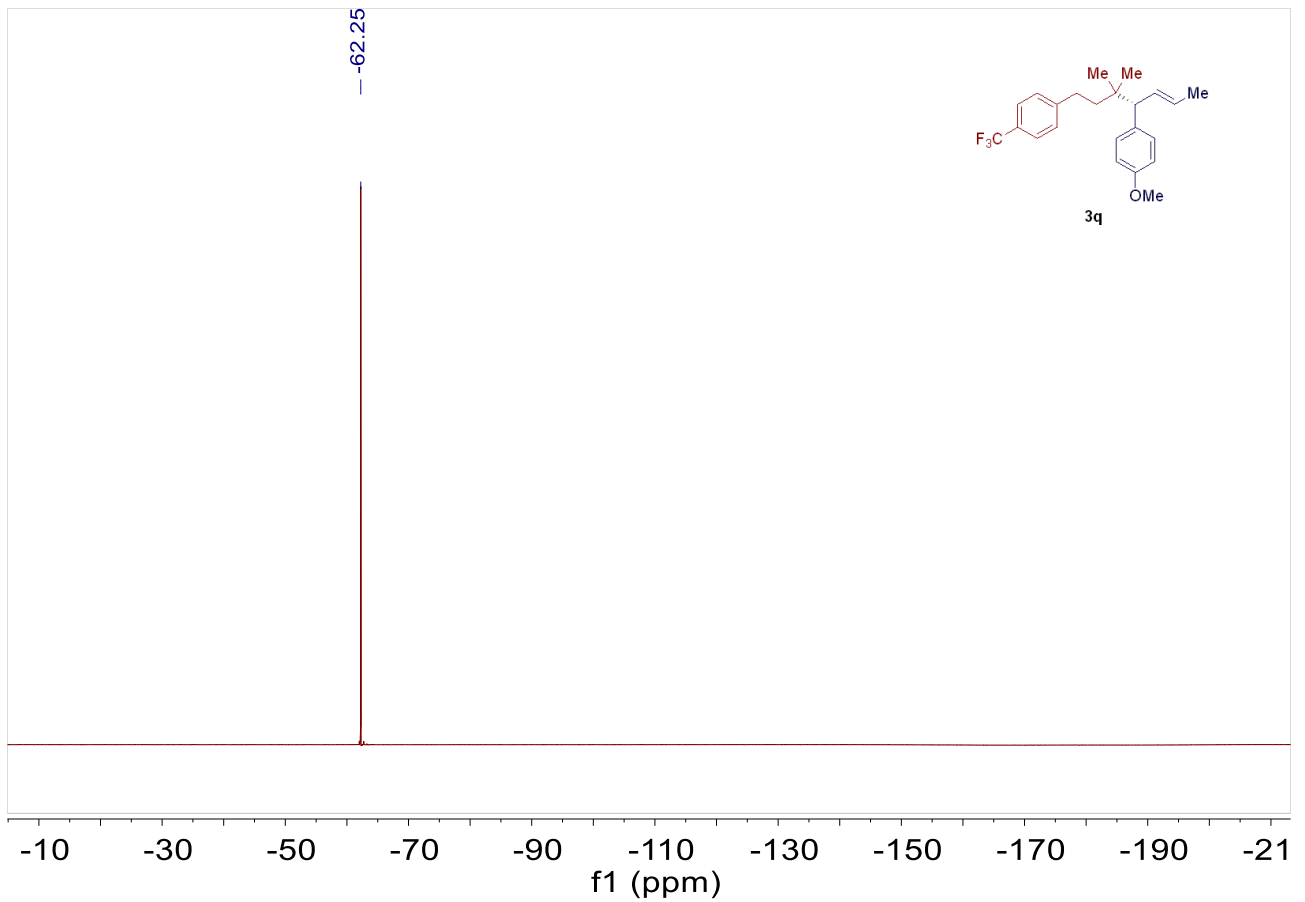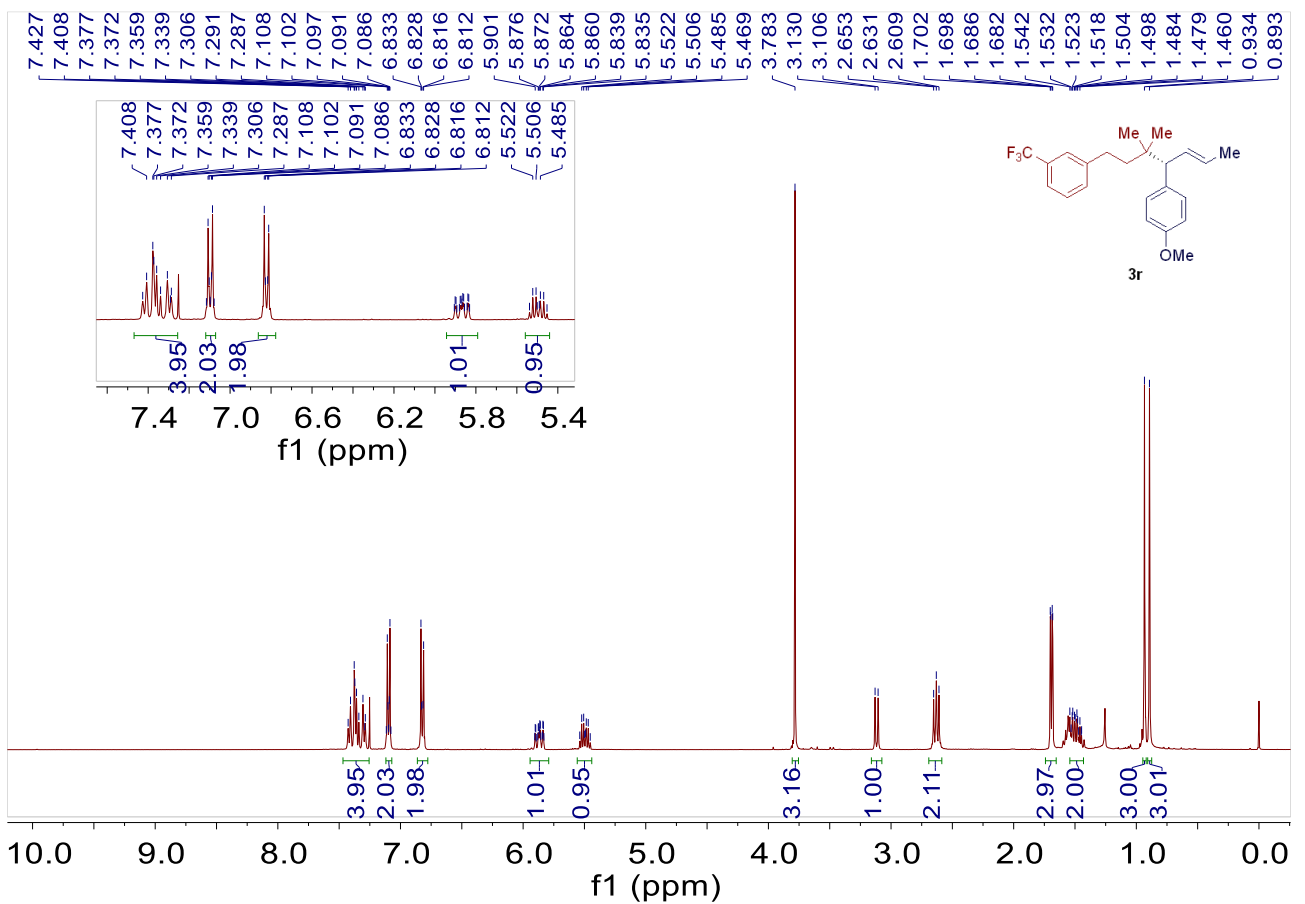

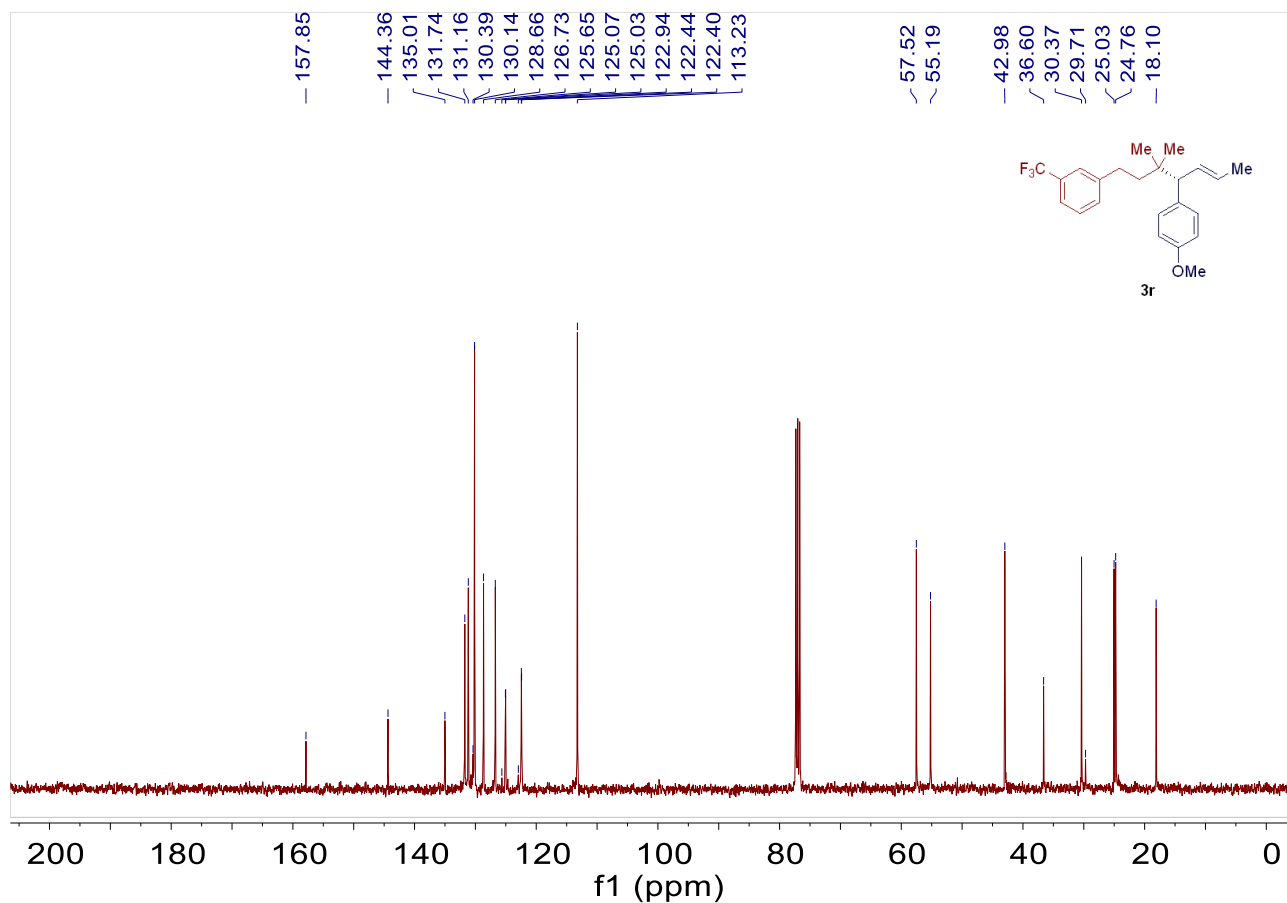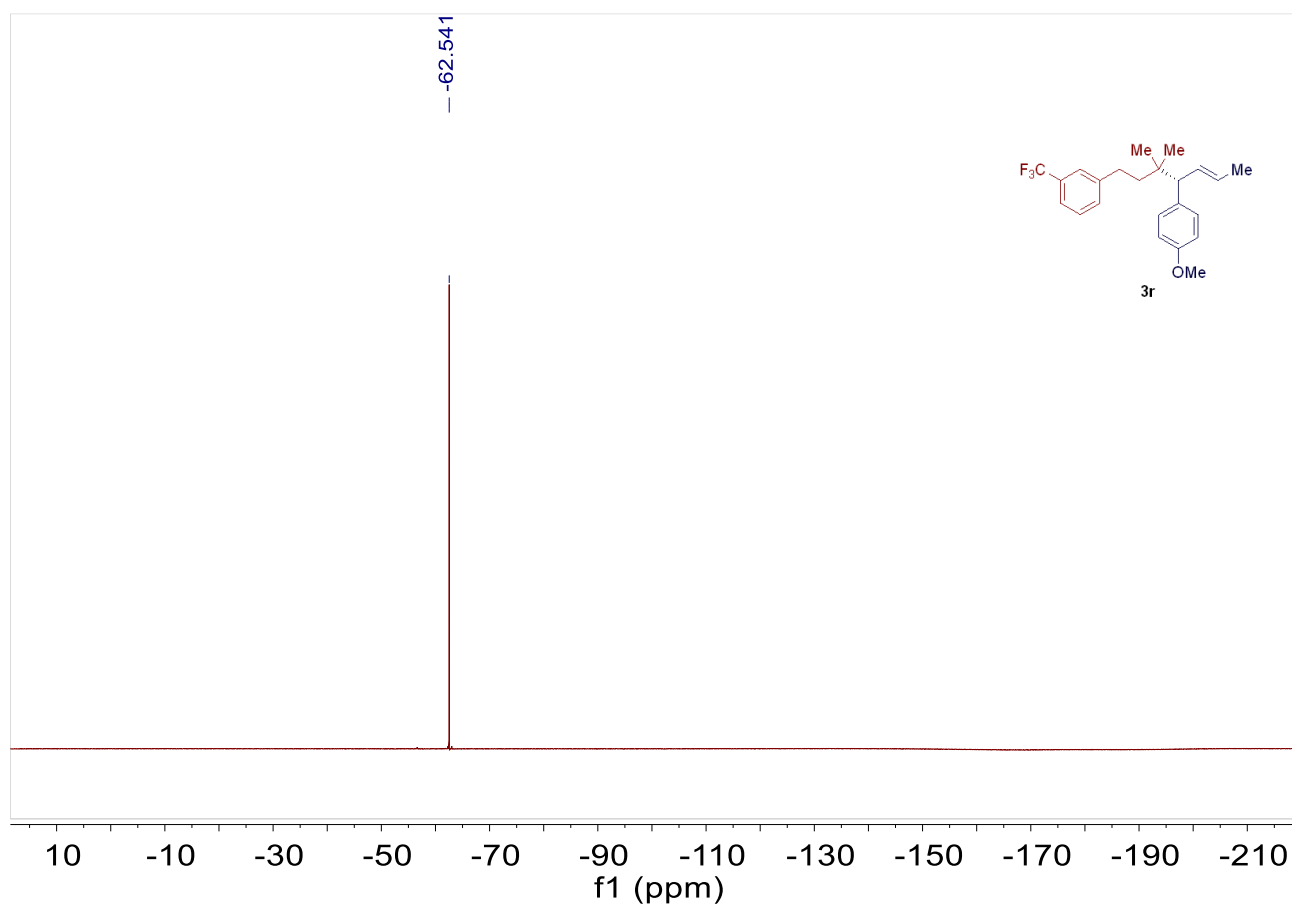

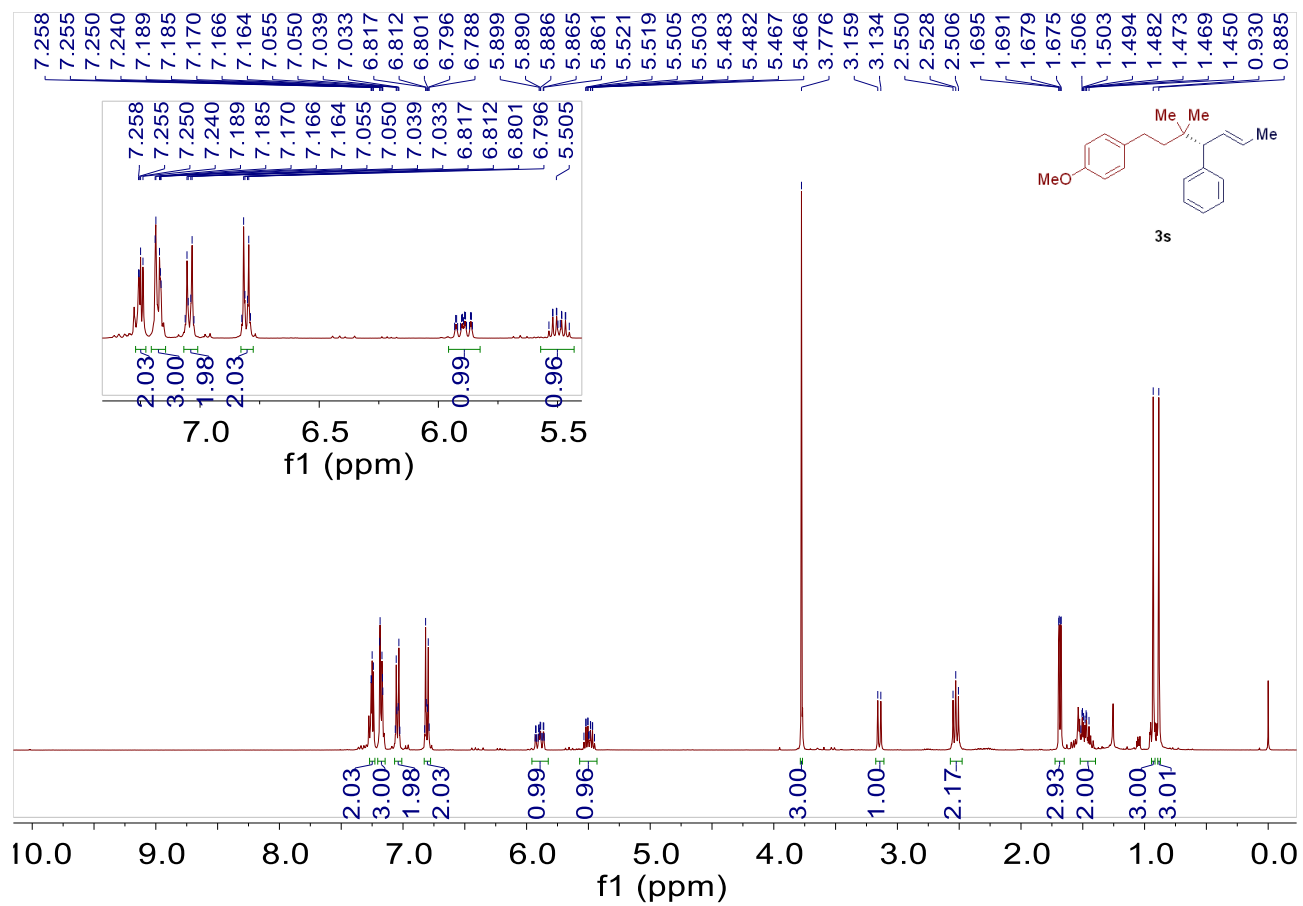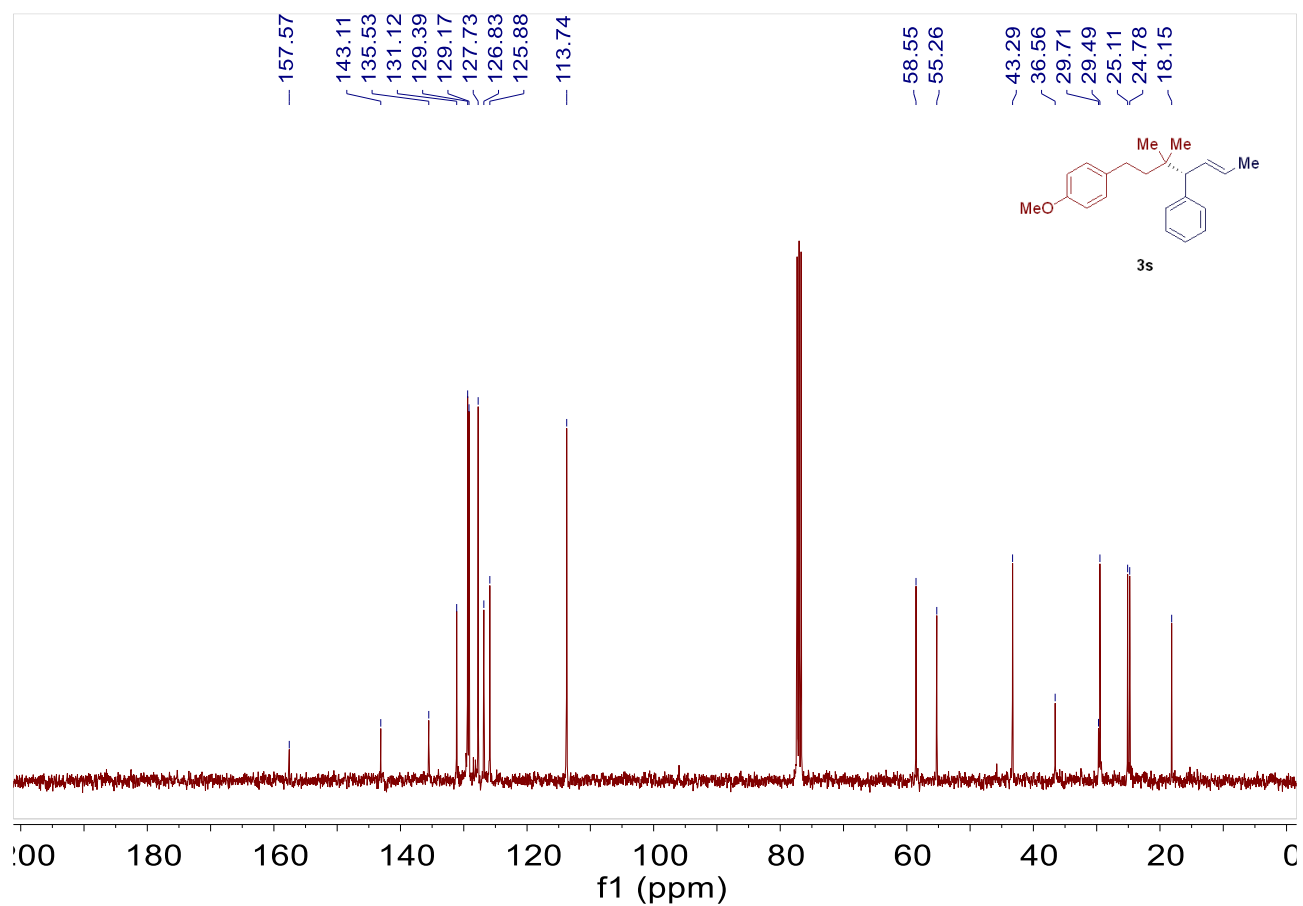

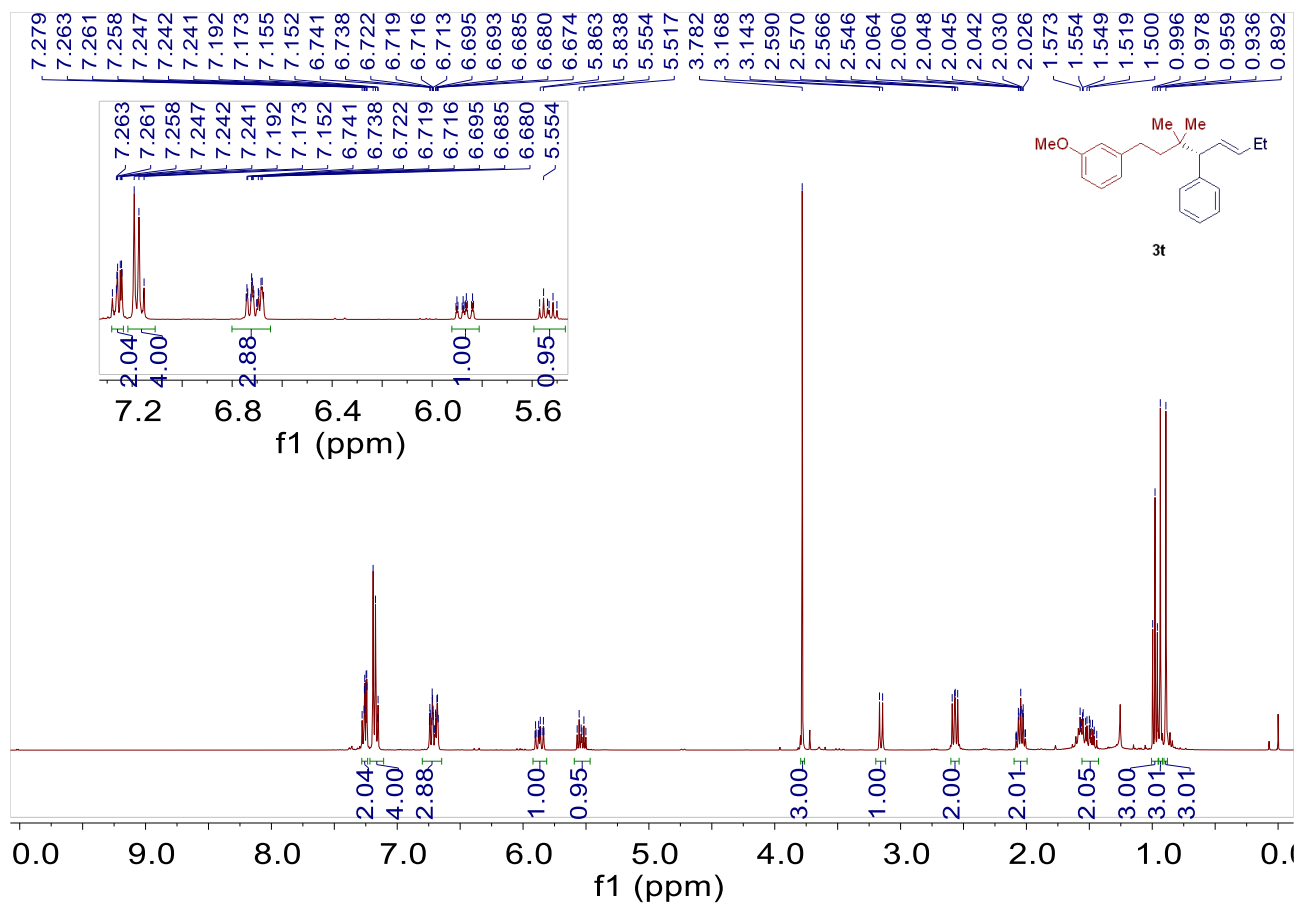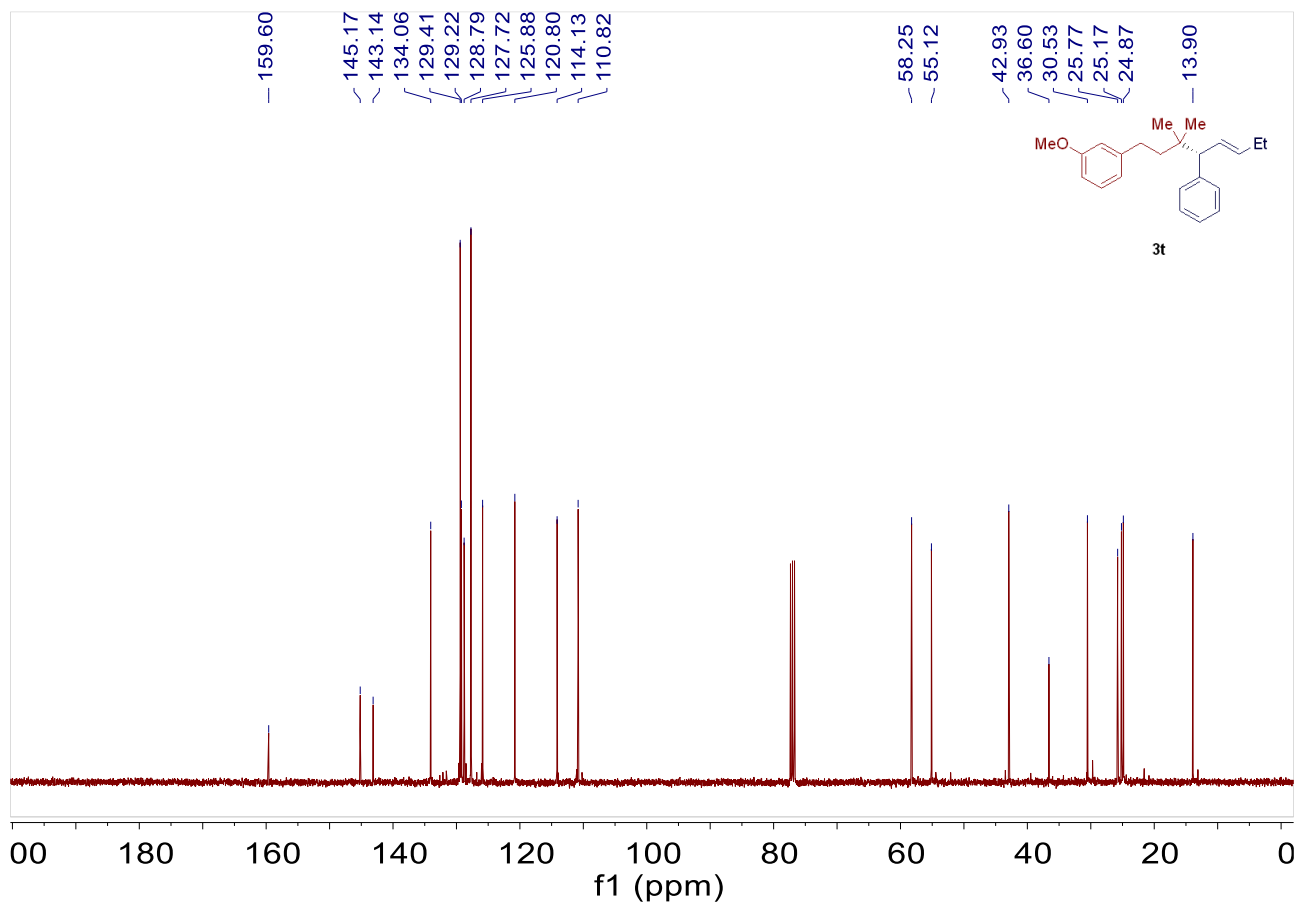

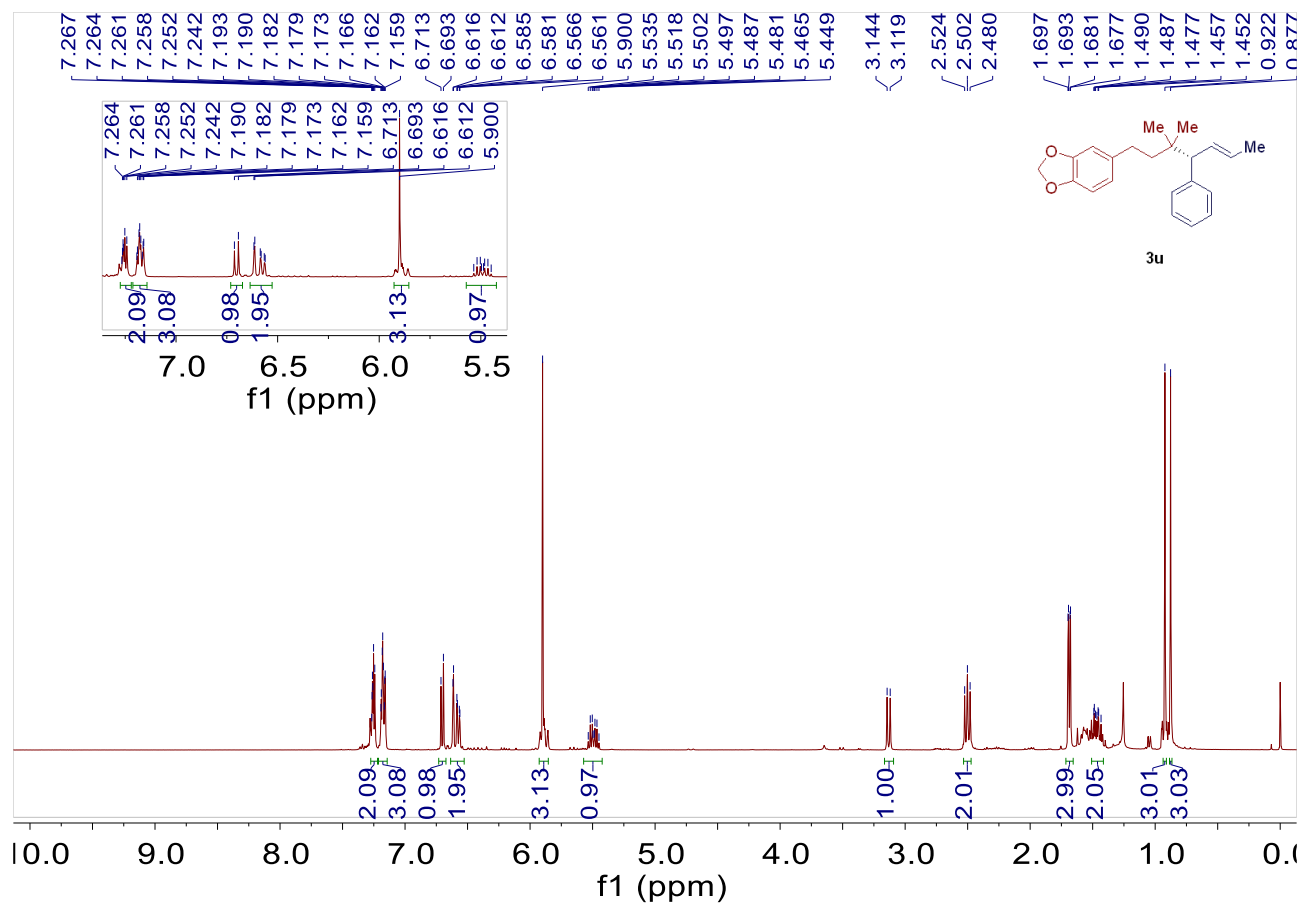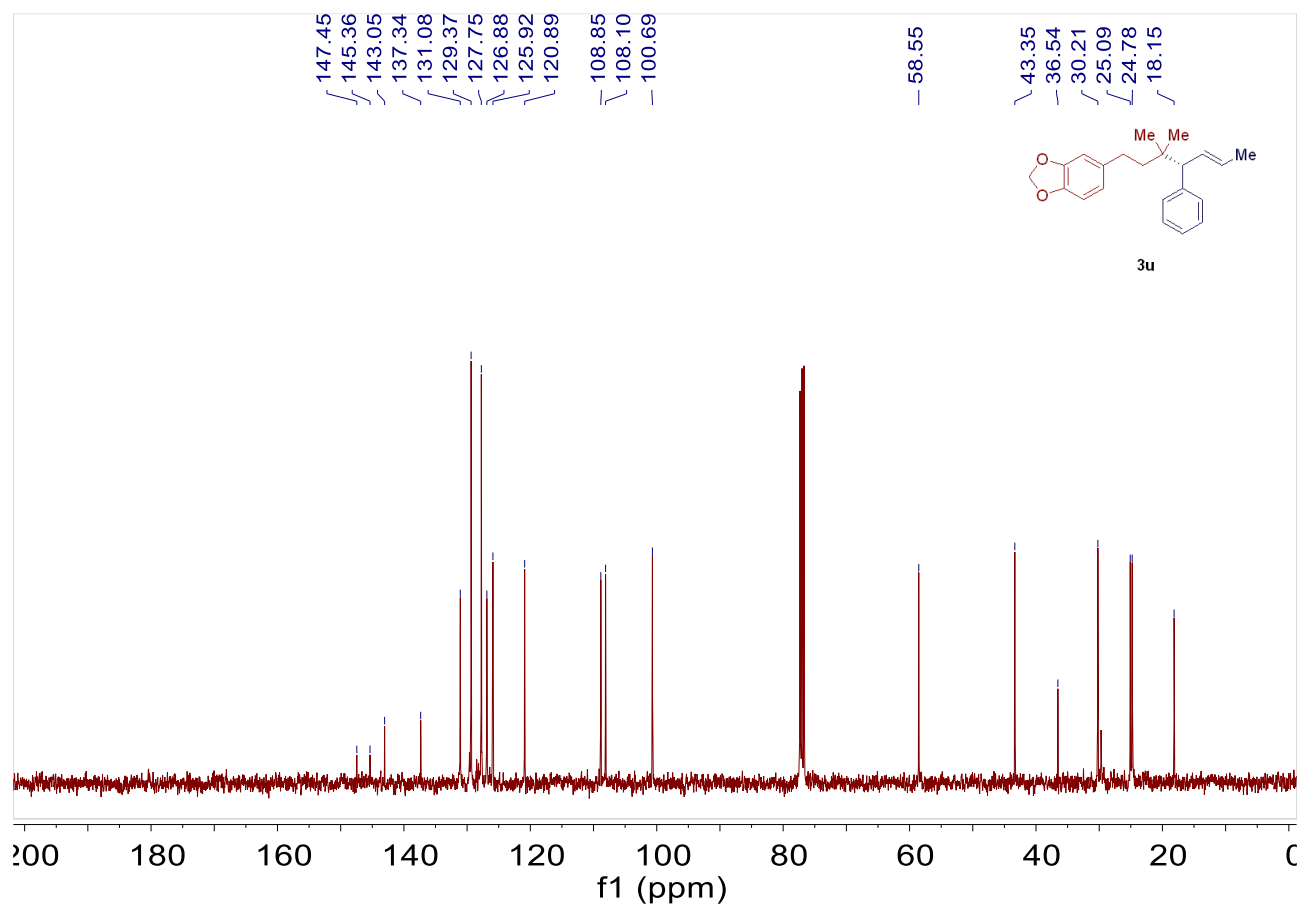

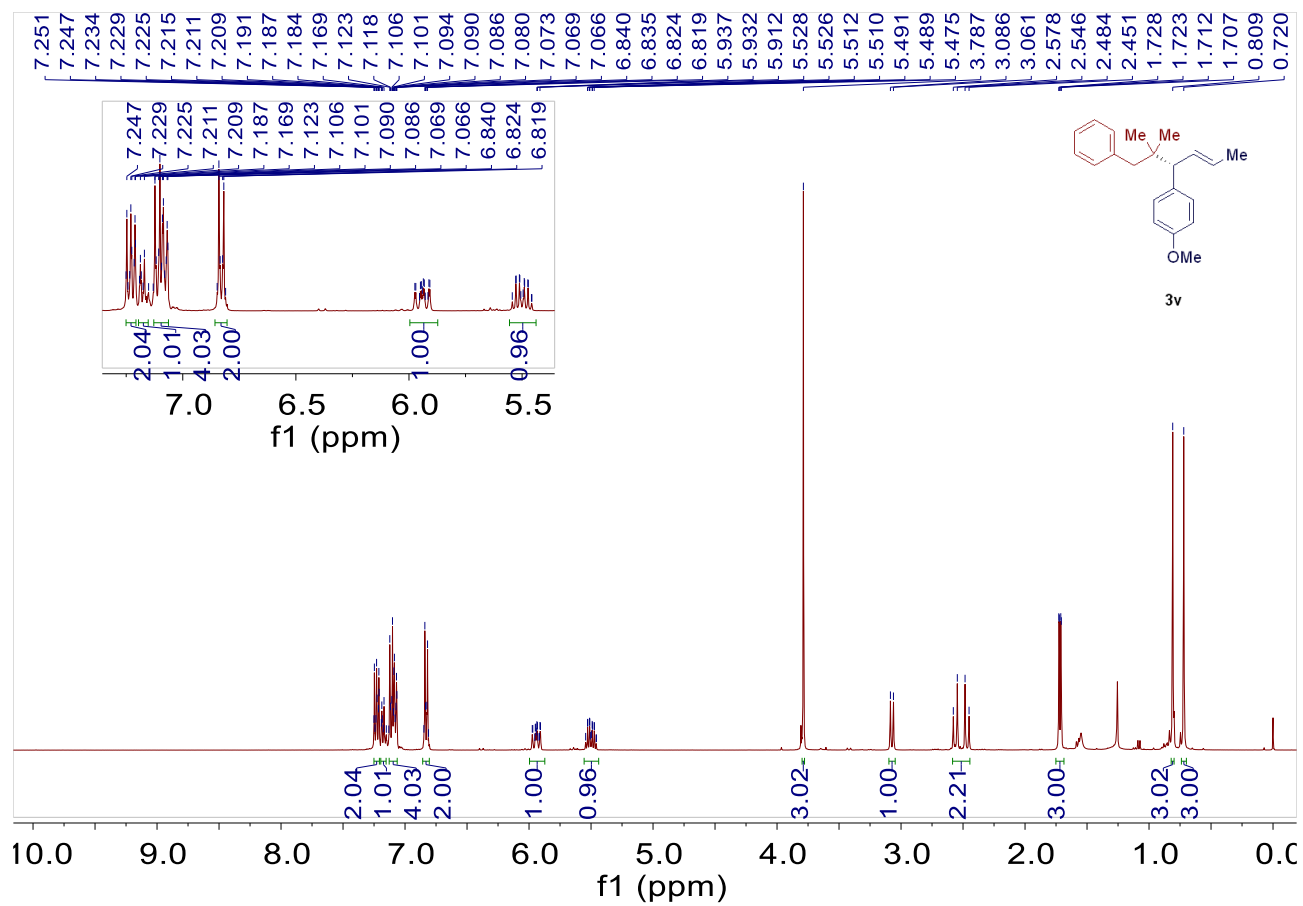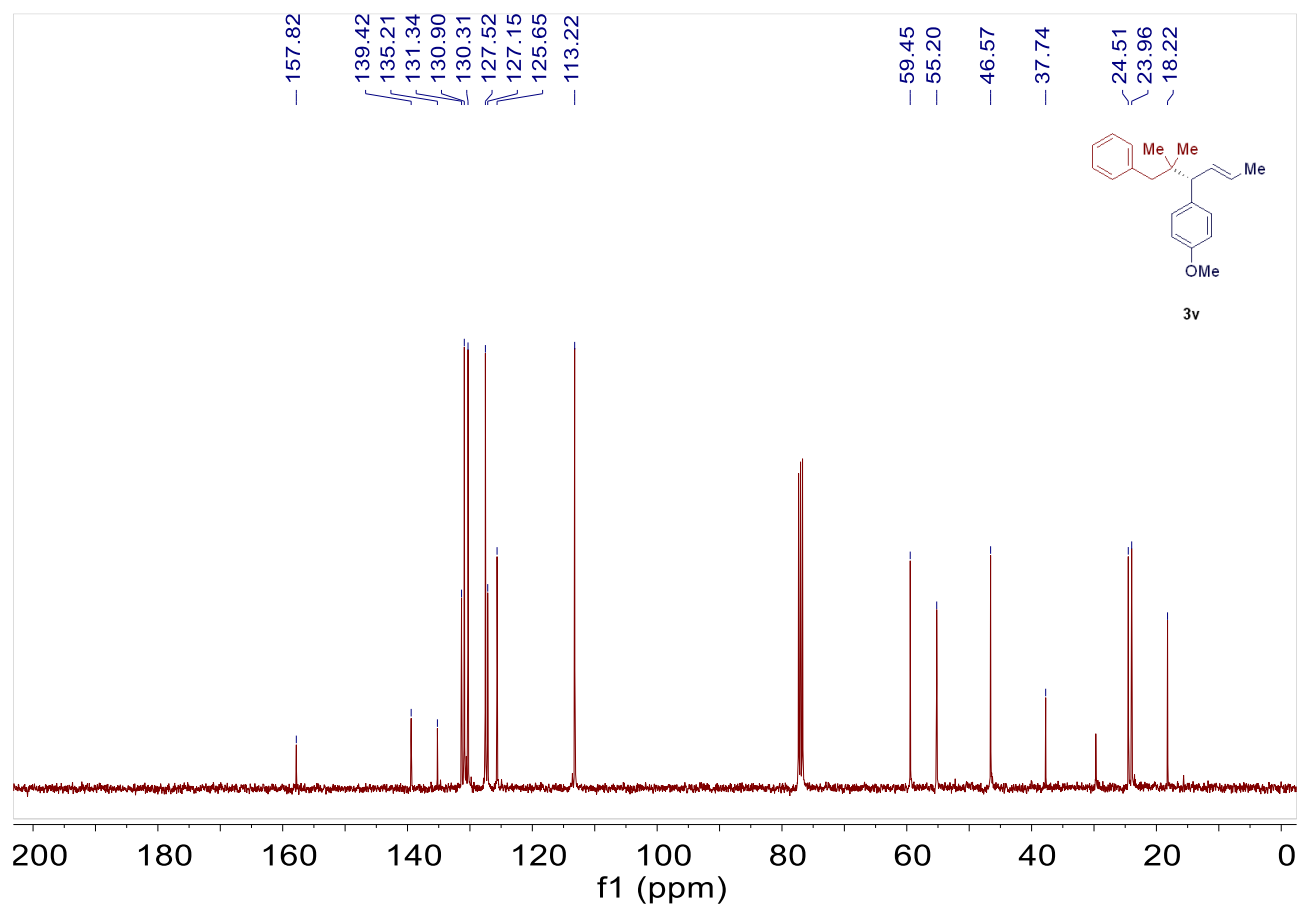

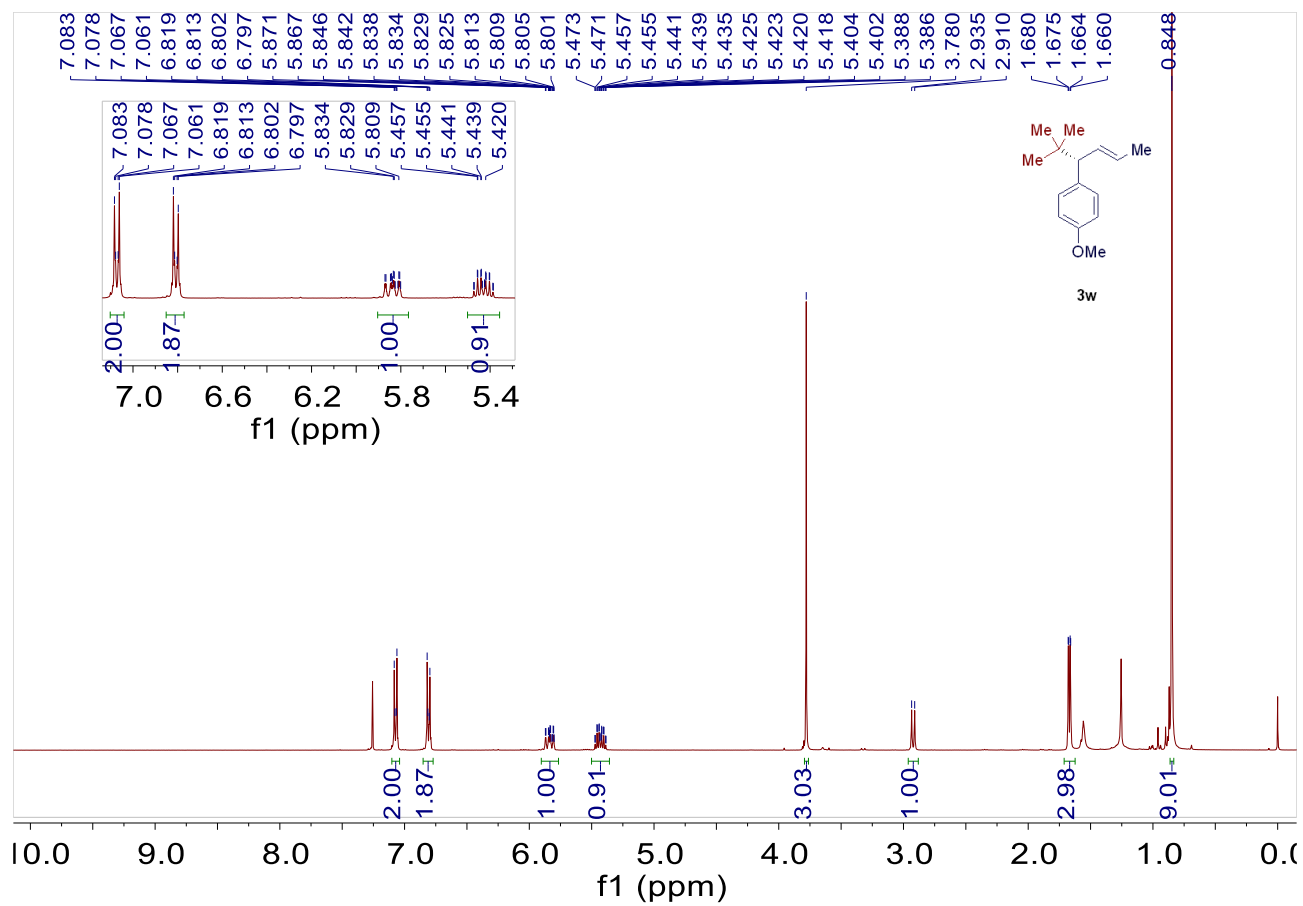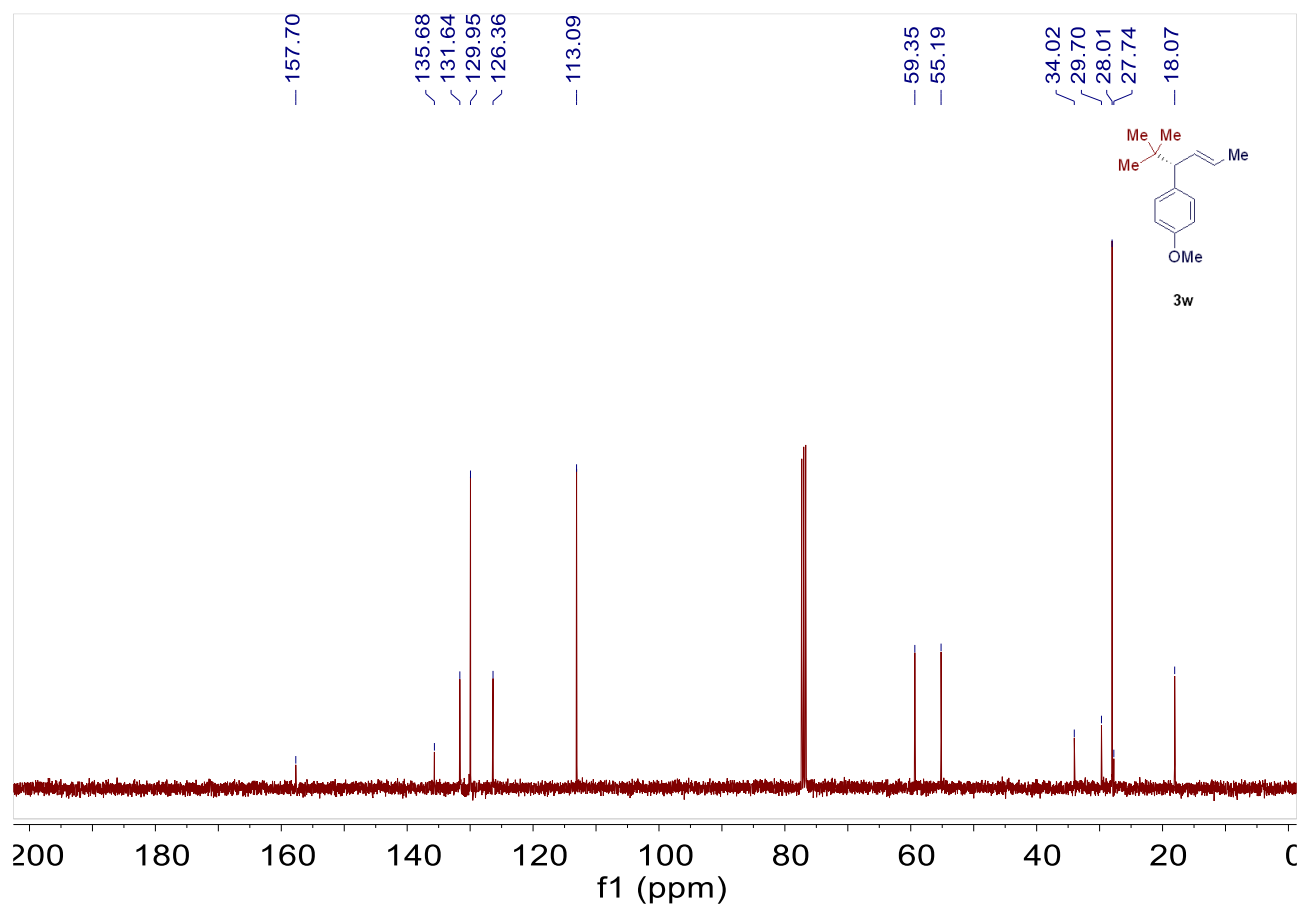



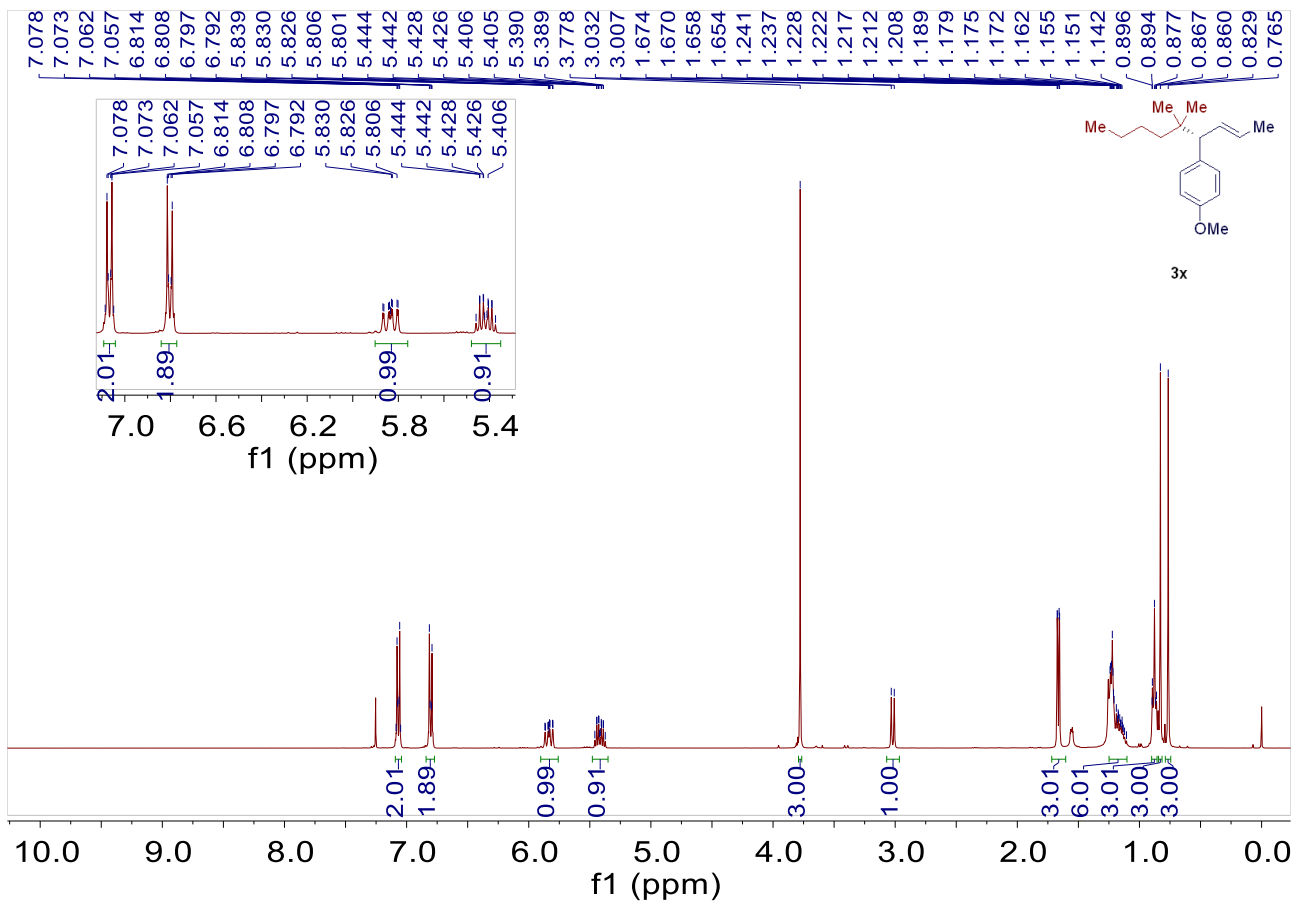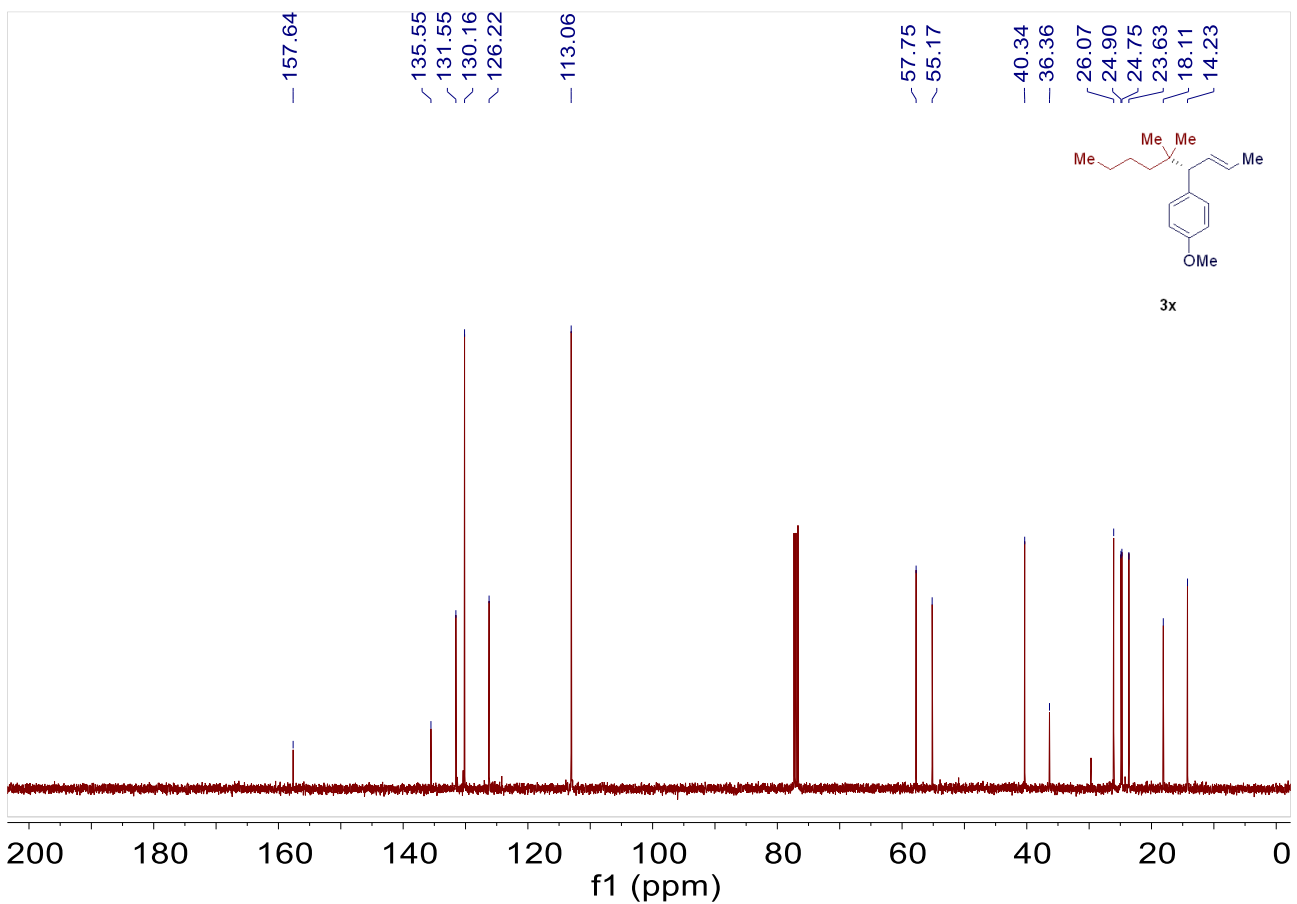

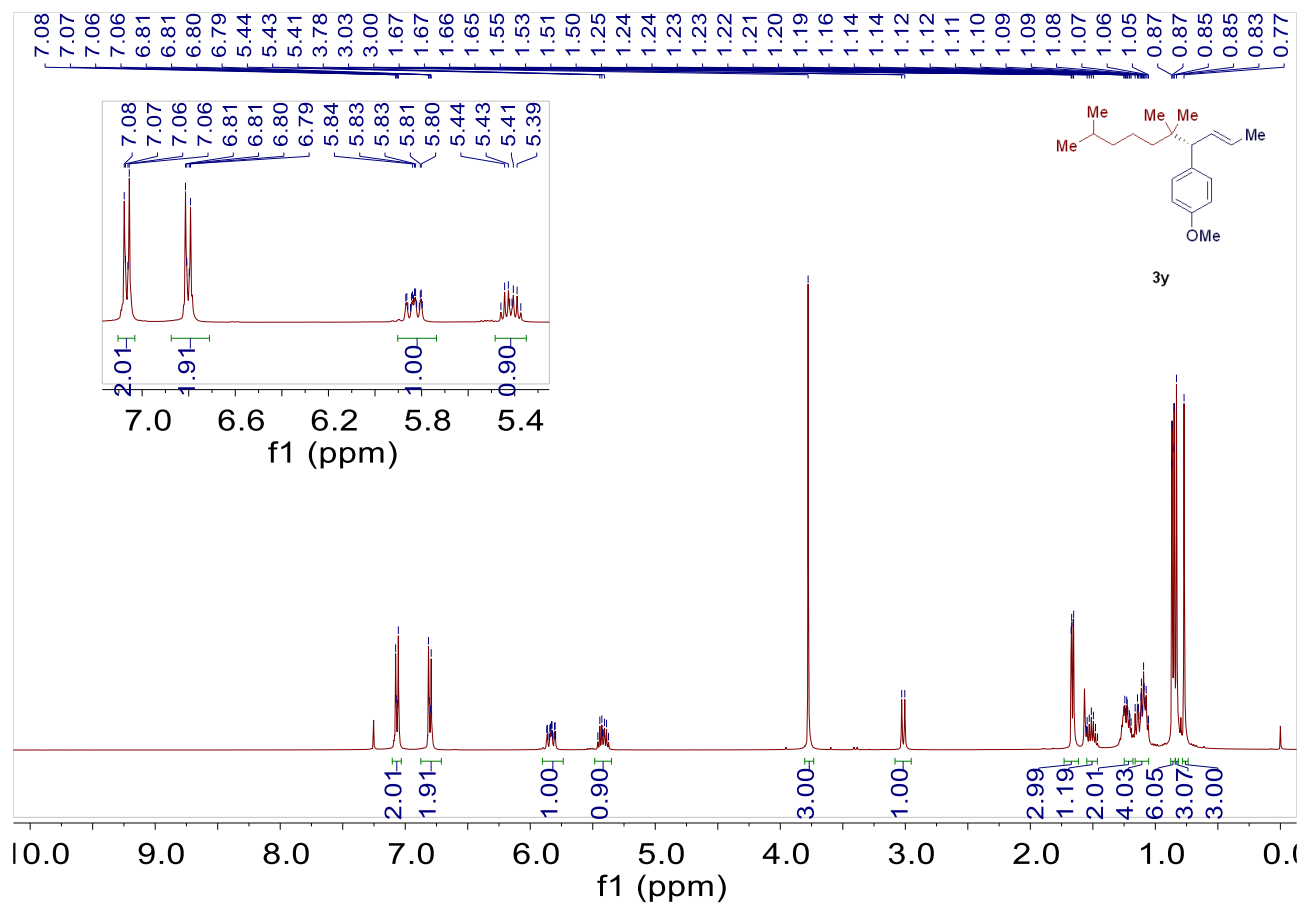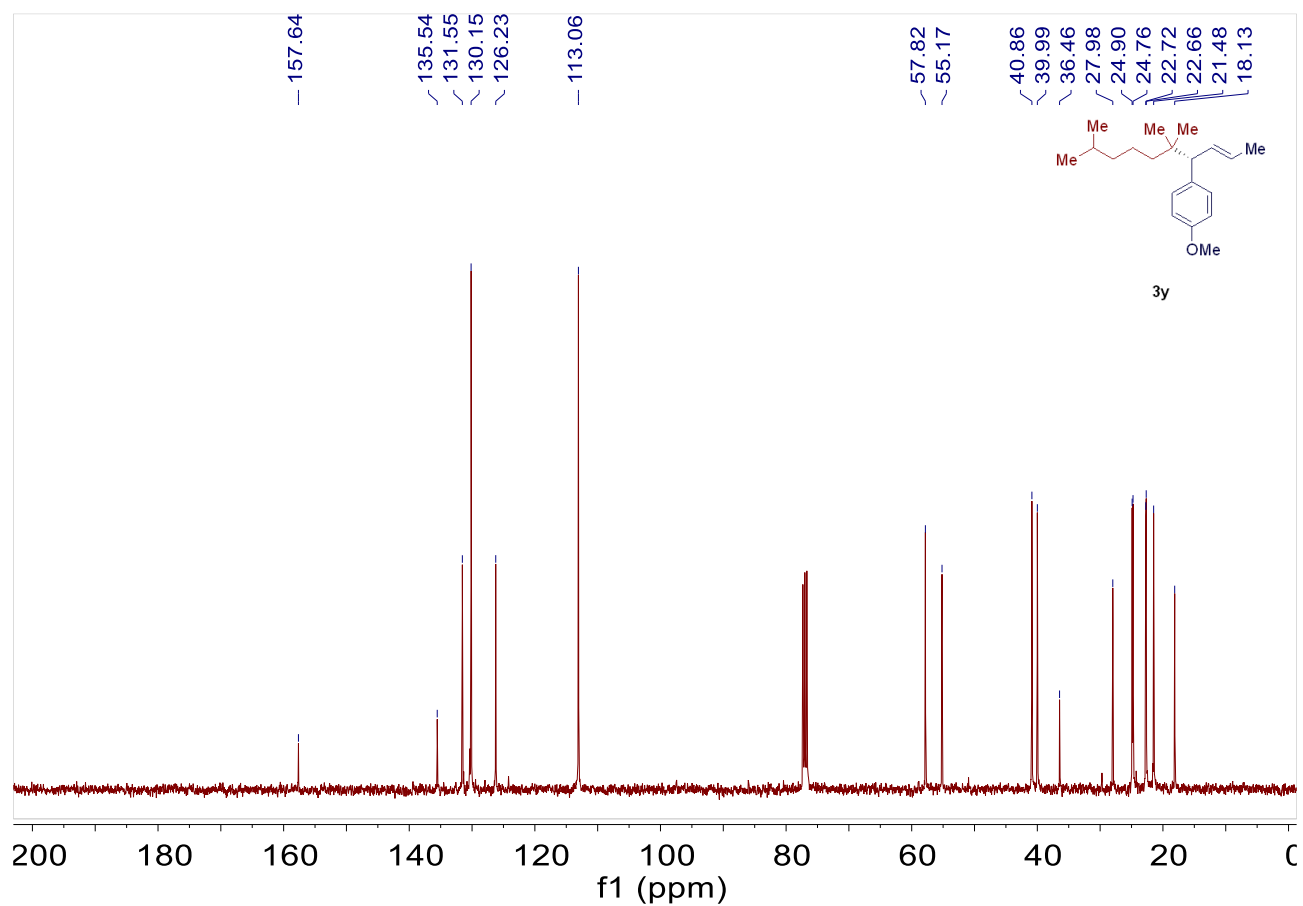

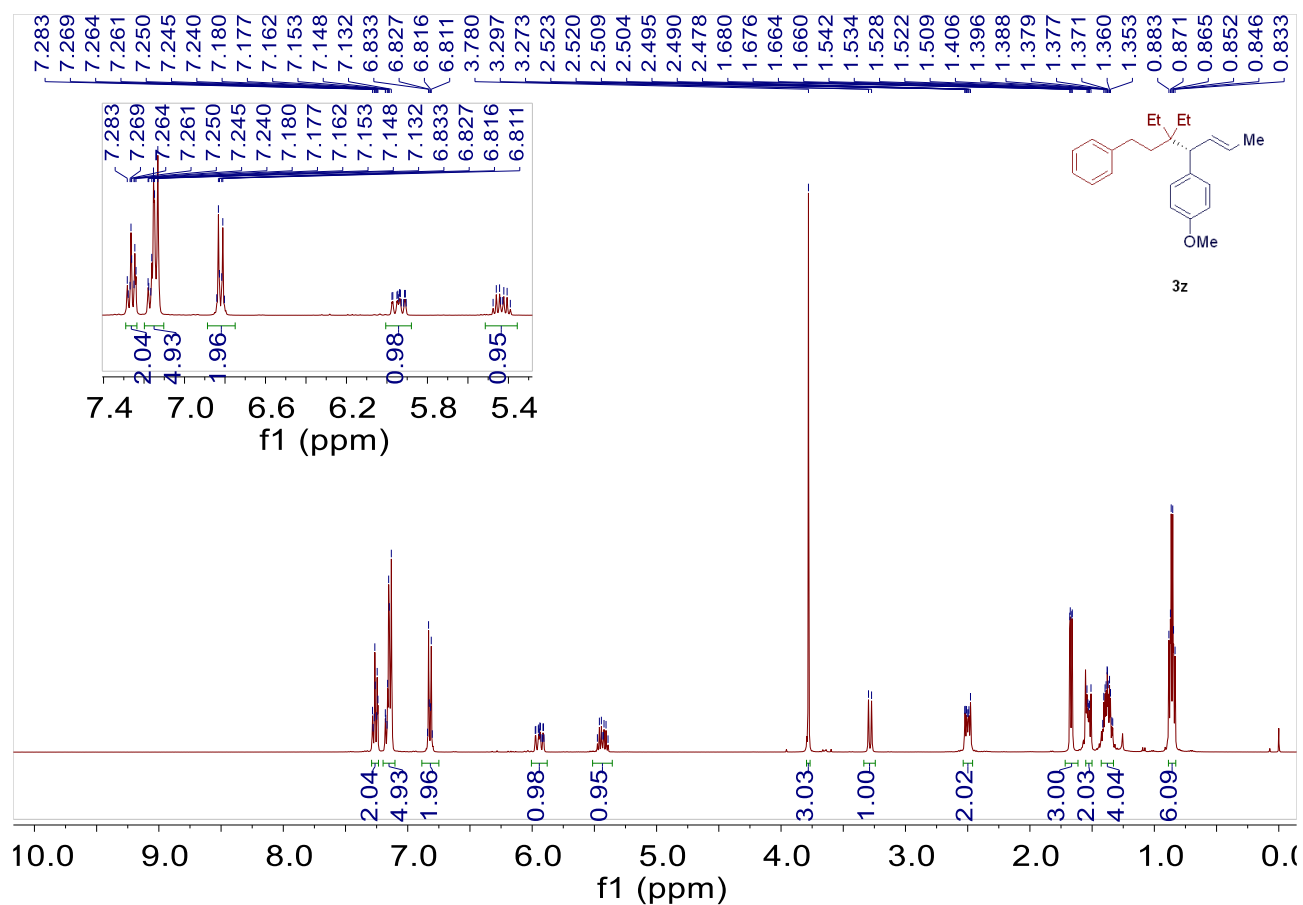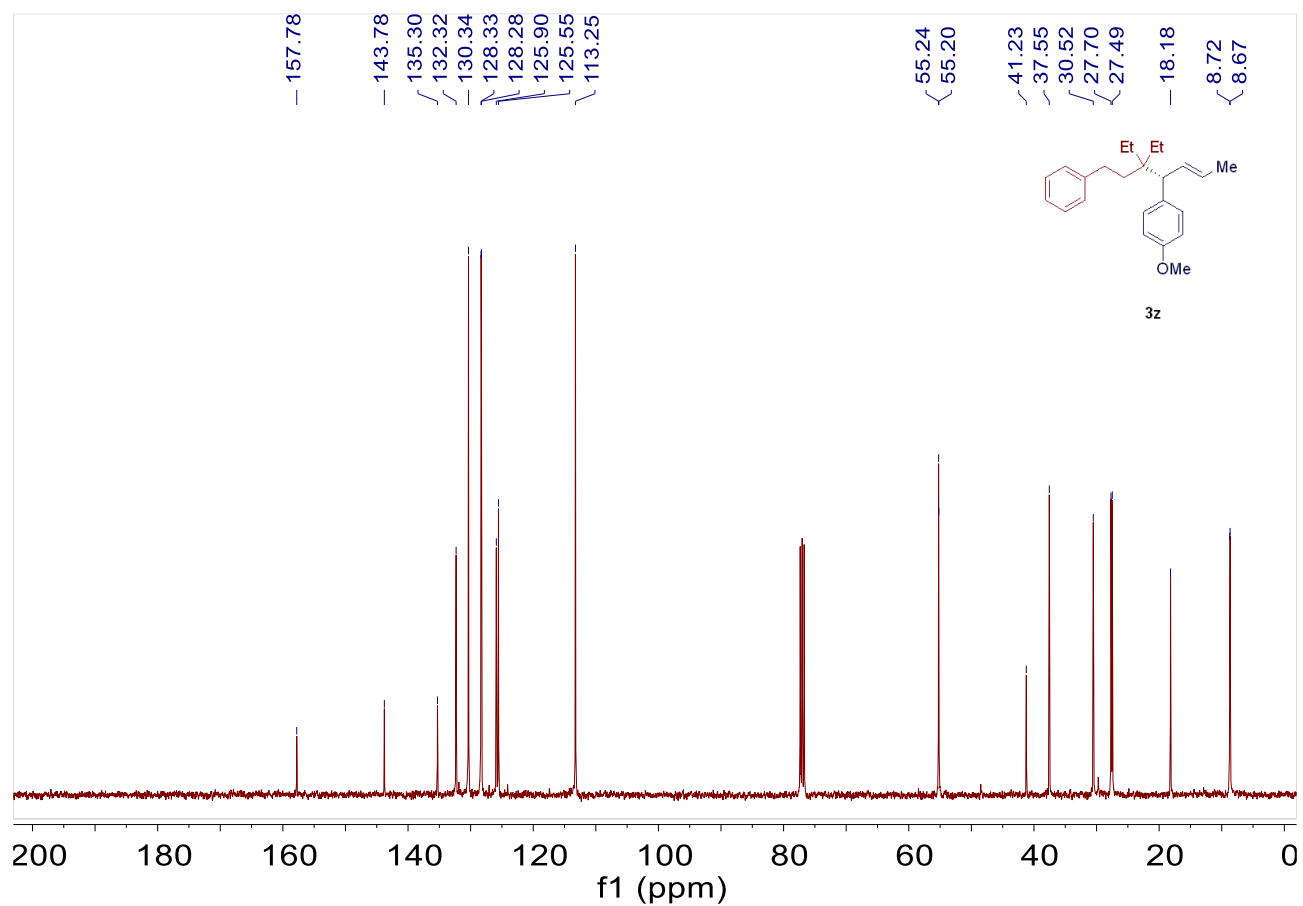

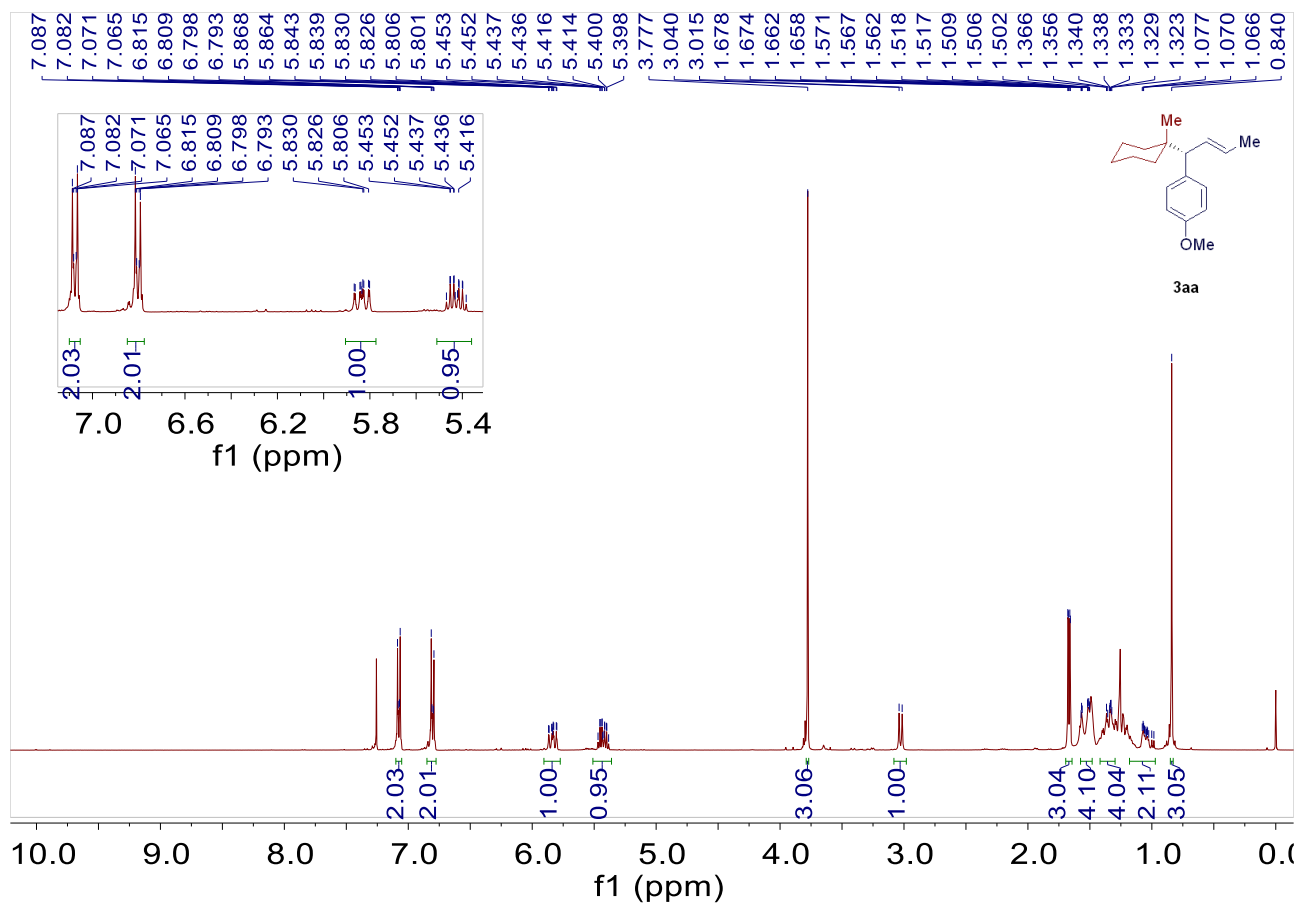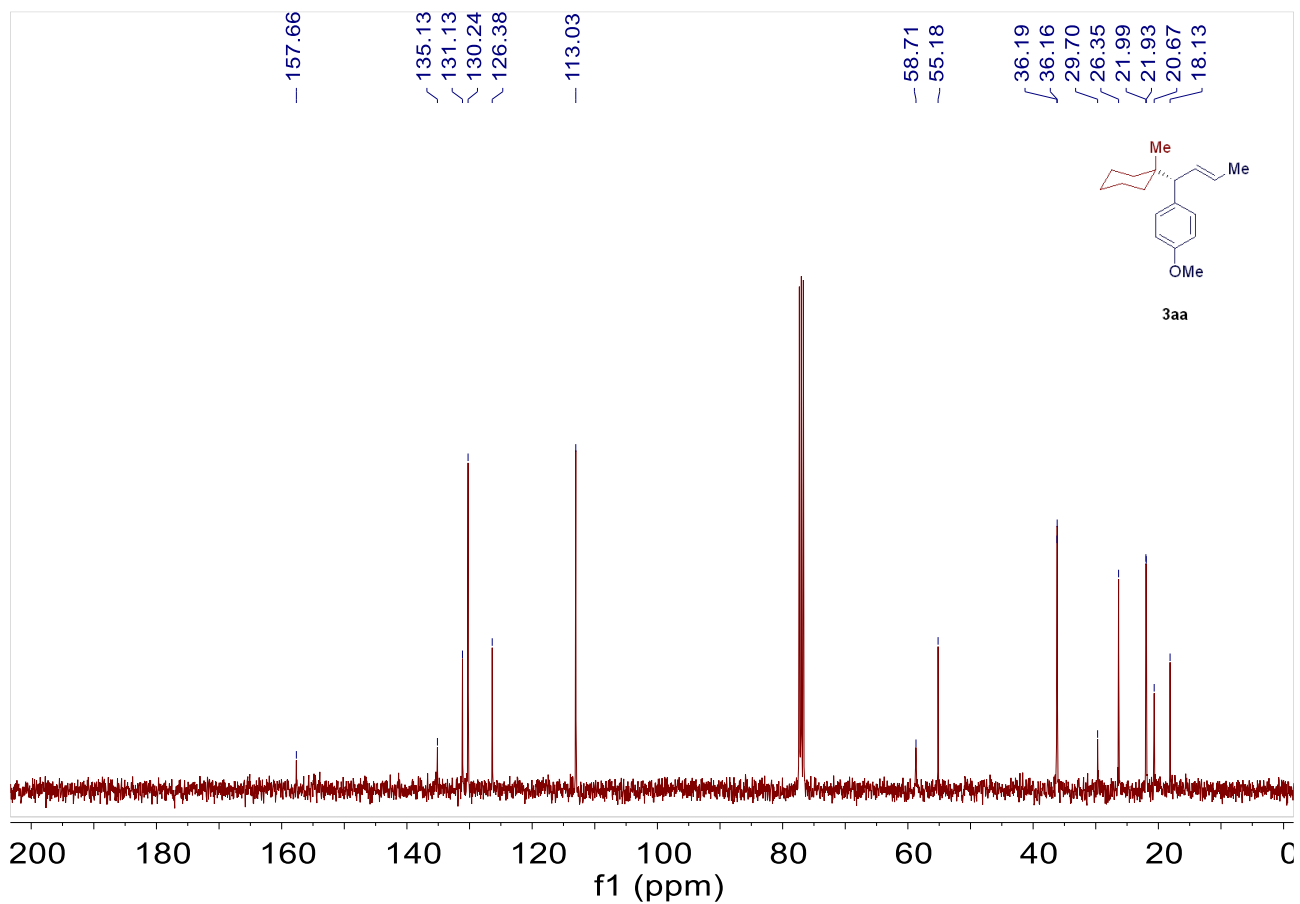

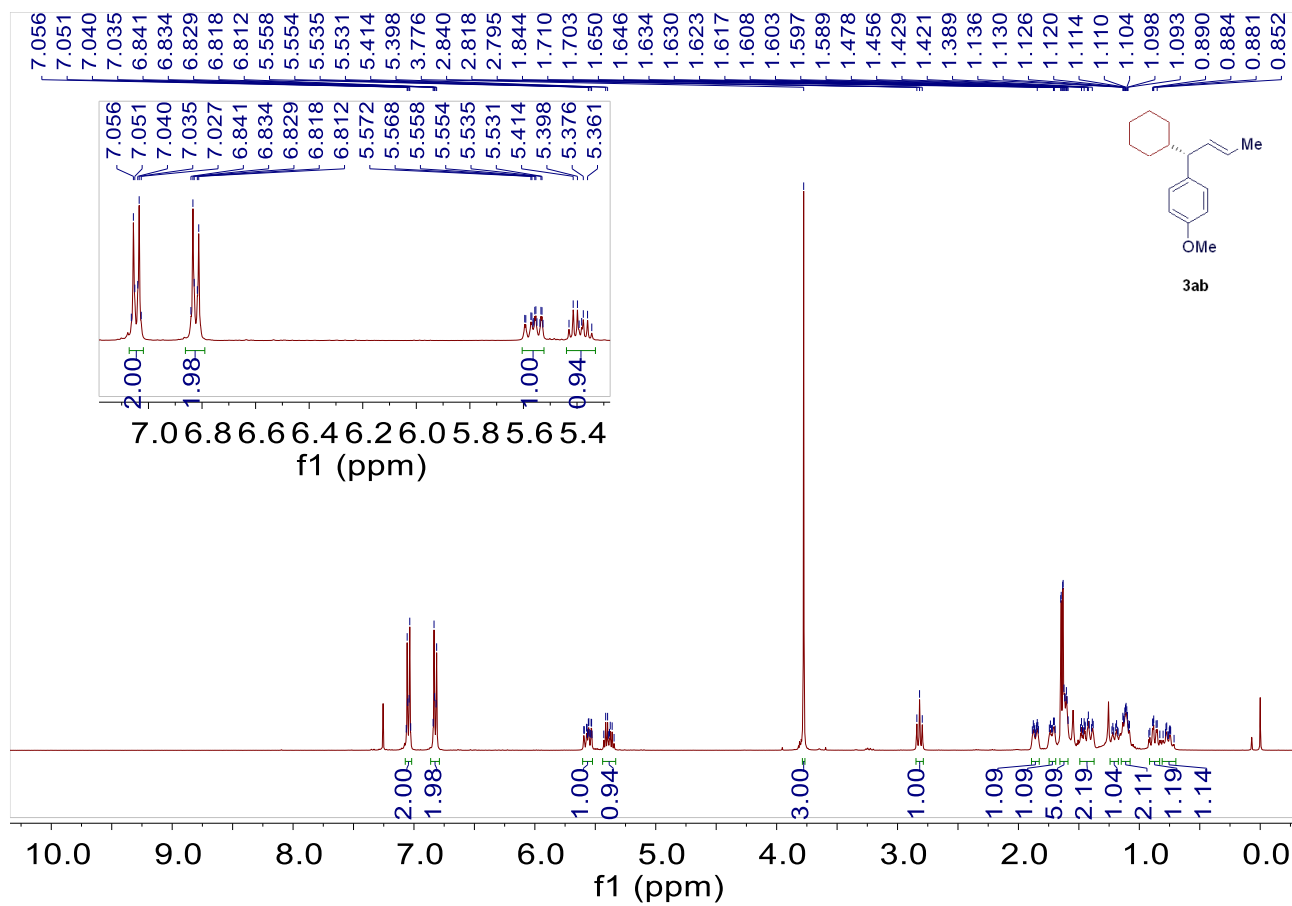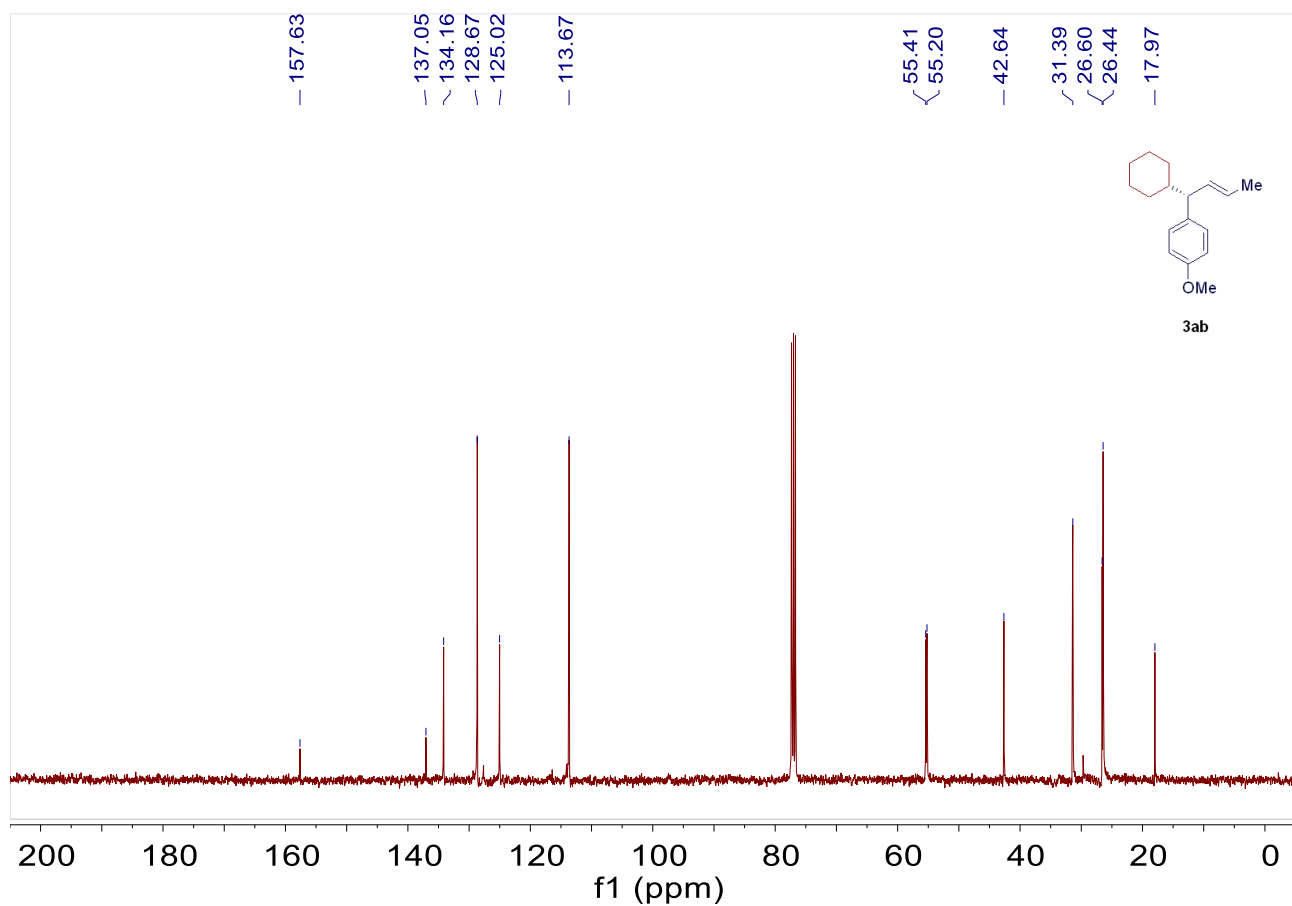

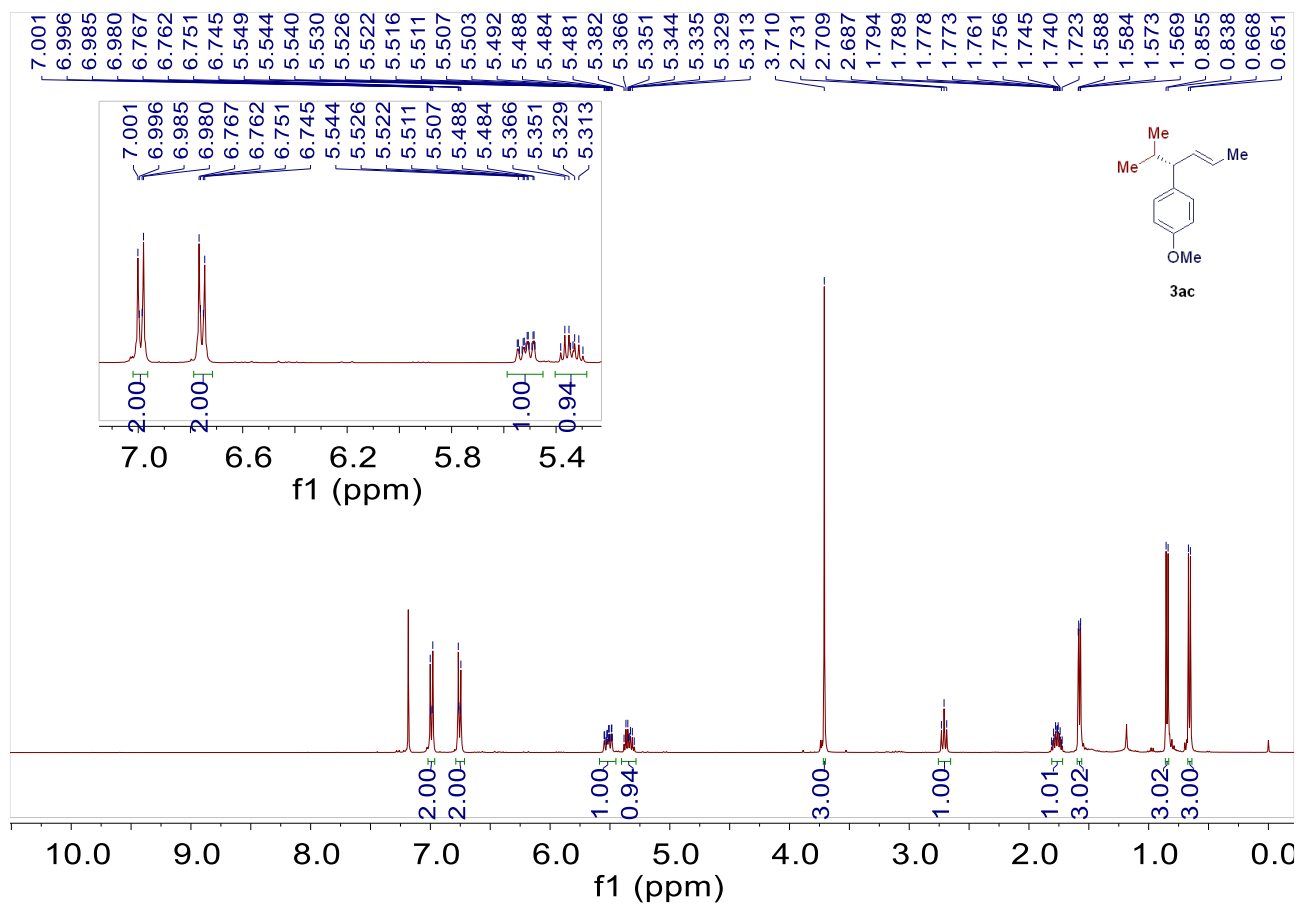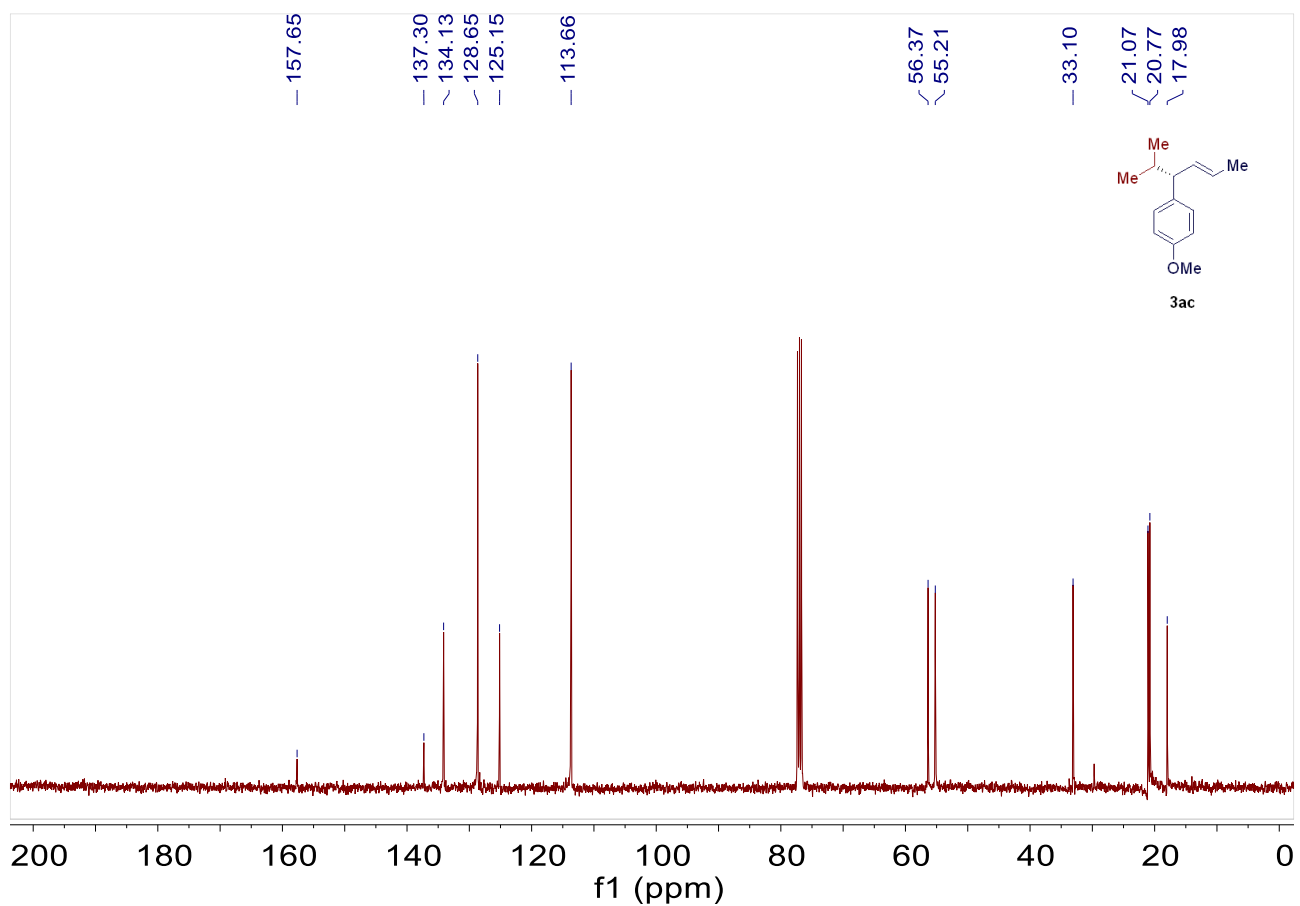

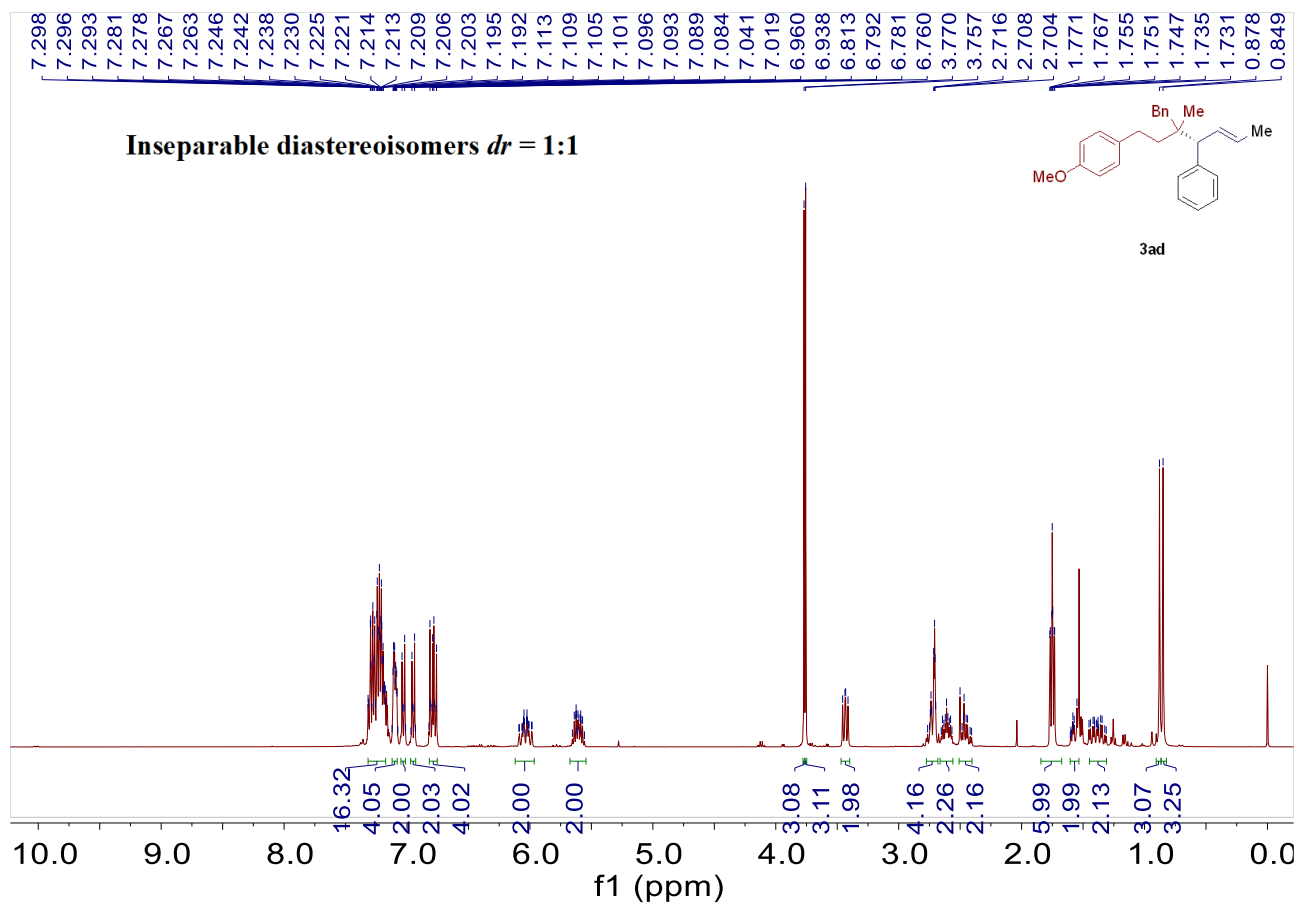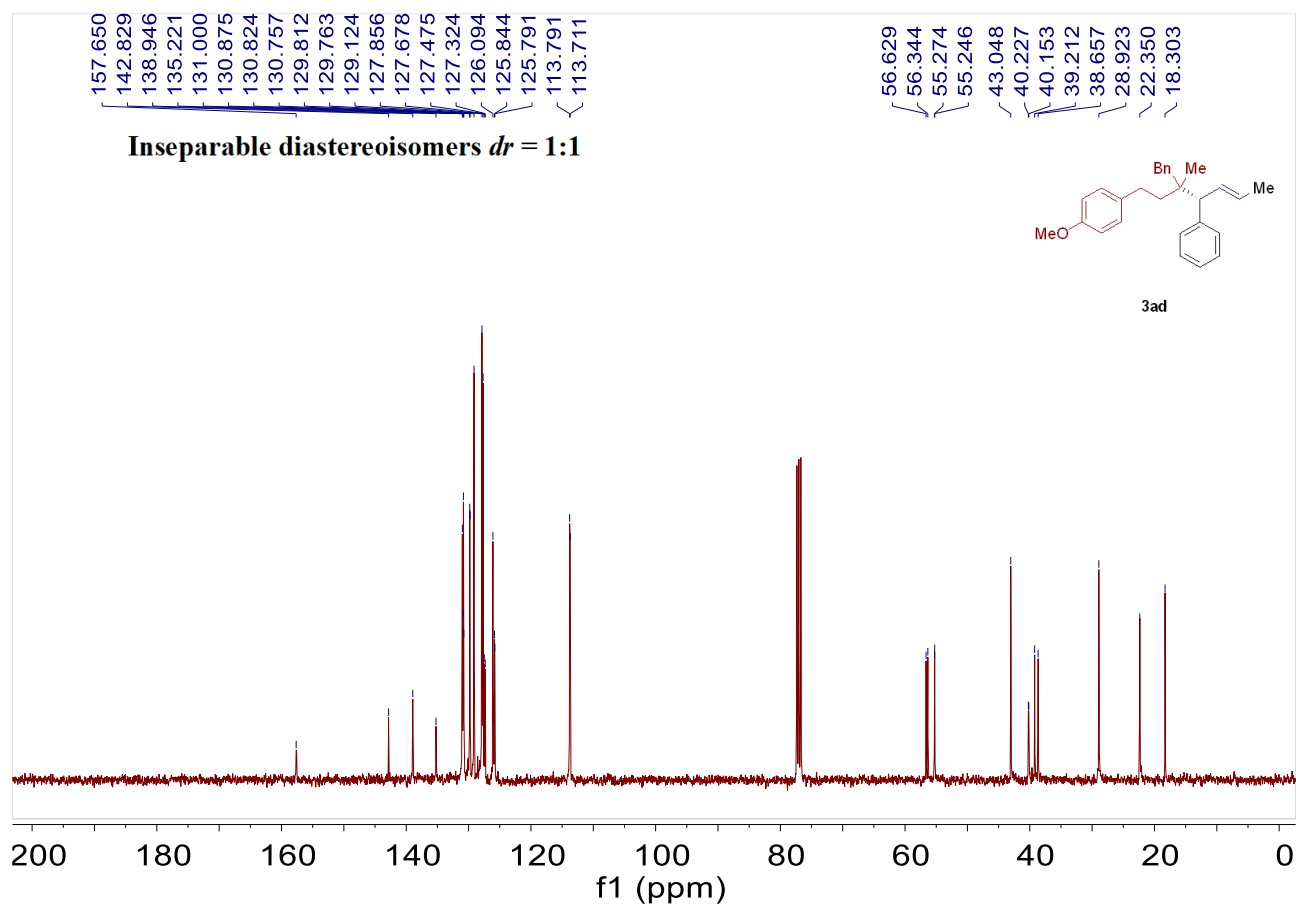

# 13. HPLC spectra

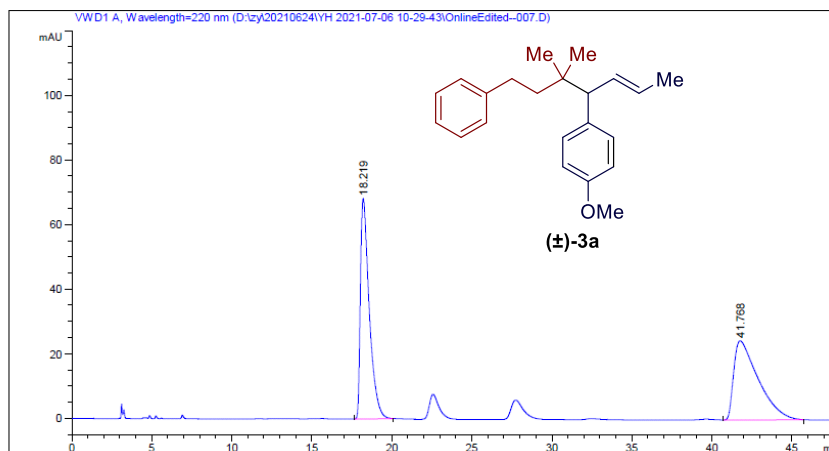

| 峰 # | 保留时间 [min] | 类型 | 峰宽 [min] | 峰面积 [mAU*s] | 峰高 [mAU] | 峰面积 %   |
|-----|------------|----|----------|-------------|----------|---------|
| 1   | 18.219     | BB | 0.5711   | 2616.20630  | 68.26635 | 50.0287 |
| 2   | 41.768     | BB | 1.5130   | 2613.20752  | 24.52783 | 49.9713 |

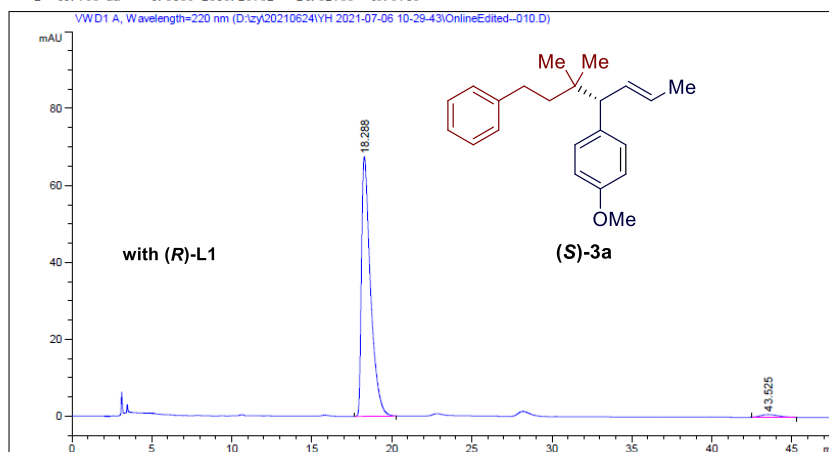

| 峰 # | 保留时间 [min] | 类型 | 峰宽 [min] | 峰面积 [mAU*s] | 峰高 [mAU]   | 峰面积 %   |
|-----|------------|----|----------|-------------|------------|---------|
| 1   | 18.288     | BB | 0.5846   | 2654.10547  | 67.52473   | 97.9020 |
| 2   | 43.525     | BB | 0.9099   | 56.87577    | 7.37347e-1 | 2.0980  |

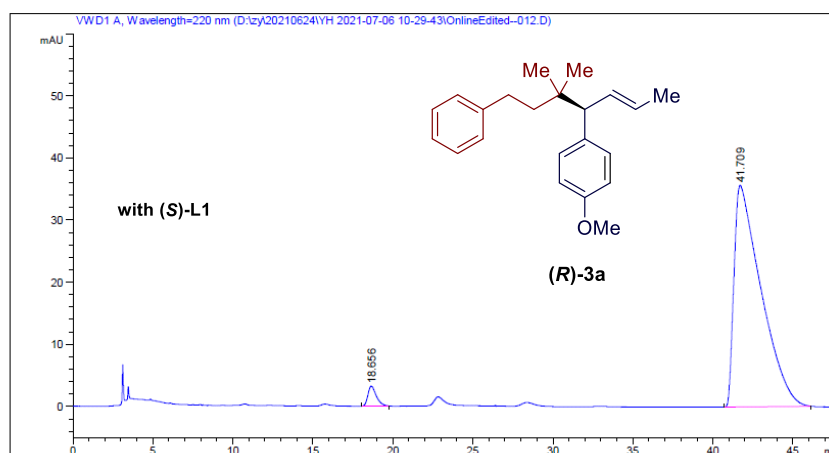

| 峰 # | 保留时间 [min] | 类型 | 峰宽 [min] | 峰面积 [mAU*s] | 峰高 [mAU] | 峰面积 %   |
|-----|------------|----|----------|-------------|----------|---------|
| 1   | 18.656     | BB | 0.5400   | 119.39038   | 3.23964  | 2.7708  |
| 2   | 41.709     | BB | 1.6082   | 4189.44678  | 35.67170 | 97.2292 |



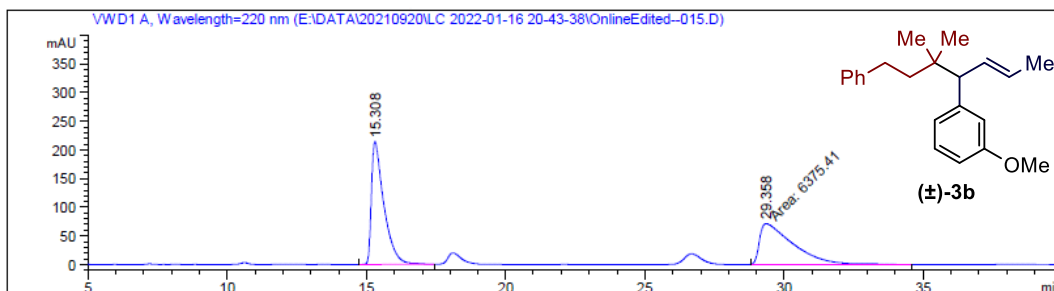

| Peak # | RetTime [min] | Type | Width [min] | Area [mAU*s] | Height [mAU] | Area %  |
|--------|---------------|------|-------------|--------------|--------------|---------|
| 1      | 15.308        | BB   | 0.4479      | 6655.06787   | 214.55164    | 51.0731 |
| 2      | 29.358        | MM   | 1.4668      | 6375.41406   | 72.44096     | 48.9269 |

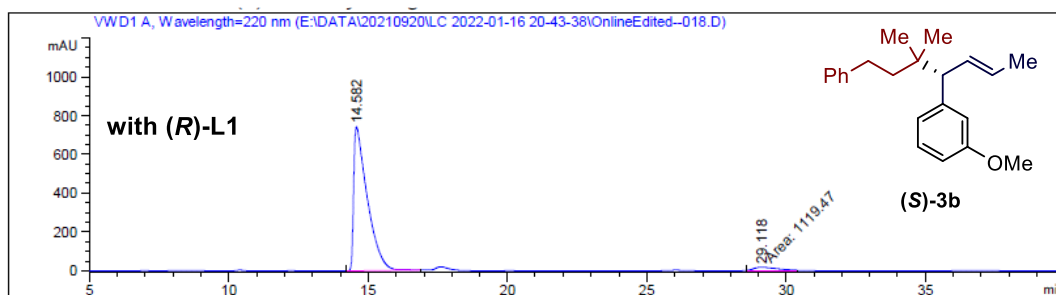

| Peak # | RetTime [min] | Type | Width [min] | Area [mAU*s] | Height [mAU] | Area %  |
|--------|---------------|------|-------------|--------------|--------------|---------|
| 1      | 14.582        | BV R | 0.4794      | 2.52905e4    | 743.24207    | 95.7612 |
| 2      | 29.118        | MF   | 1.0236      | 1119.47192   | 18.22857     | 4.2388  |

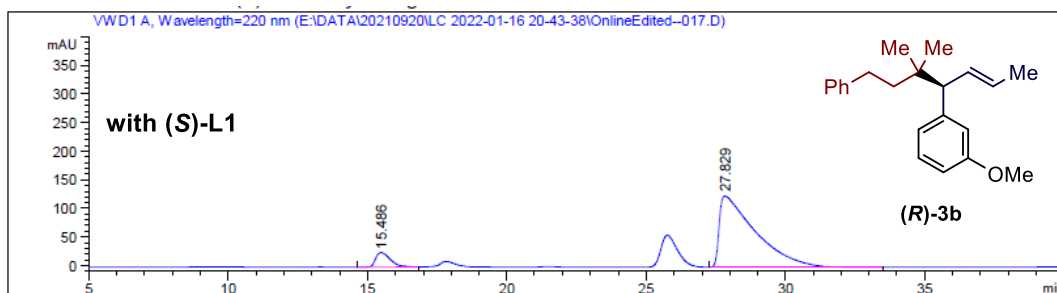

| Peak # | RetTime [min] | Type | Width [min] | Area [mAU*s] | Height [mAU] | Area %  |
|--------|---------------|------|-------------|--------------|--------------|---------|
| 1      | 15.486        | BB   | 0.5863      | 963.41742    | 25.64508     | 7.8629  |
| 2      | 27.829        | BB   | 1.2395      | 1.12893e4    | 124.77864    | 92.1371 |

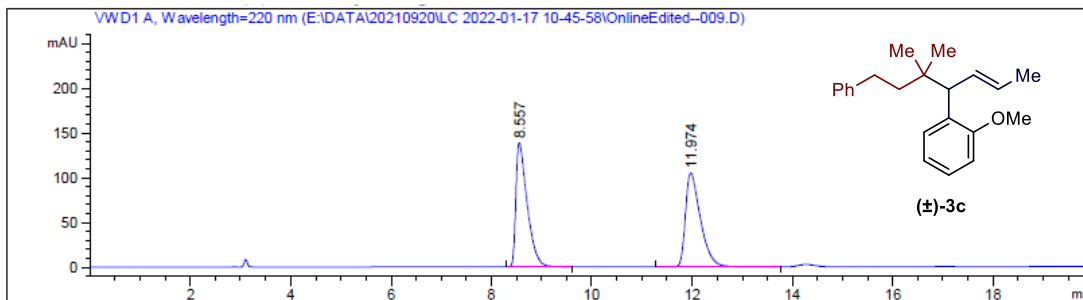

| Peak # | RetTime [min] | Type | Width [min] | Area [mAU*s] | Height [mAU] | Area %  |
|--------|---------------|------|-------------|--------------|--------------|---------|
| 1      | 8.557         | BB   | 0.2297      | 2162.60889   | 138.88603    | 49.8307 |
| 2      | 11.974        | BB   | 0.3108      | 2177.30322   | 105.03326    | 50.1693 |

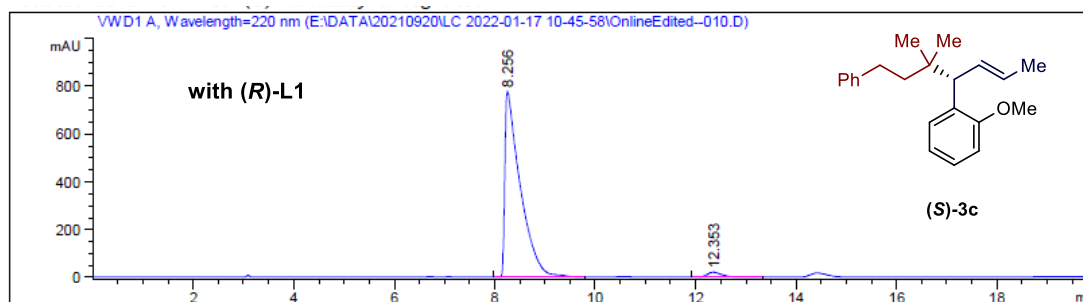

| Peak # | RetTime [min] | Type | Width [min] | Area [mAU*s] | Height [mAU] | Area %  |
|--------|---------------|------|-------------|--------------|--------------|---------|
| 1      | 8.256         | BB   | 0.2902      | 1.65802e4    | 779.42249    | 97.4365 |
| 2      | 12.353        | BB   | 0.3176      | 436.20856    | 21.05996     | 2.5635  |

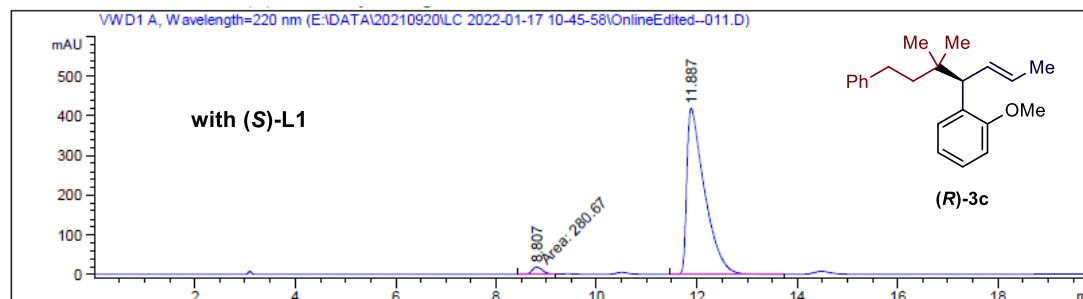

| Peak # | RetTime [min] | Type | Width [min] | Area [mAU*s] | Height [mAU] | Area %  |
|--------|---------------|------|-------------|--------------|--------------|---------|
| 1      | 8.807         | MF   | 0.2472      | 280.67047    | 18.92015     | 2.6565  |
| 2      | 11.887        | BB   | 0.3520      | 1.02848e4    | 419.52045    | 97.3435 |

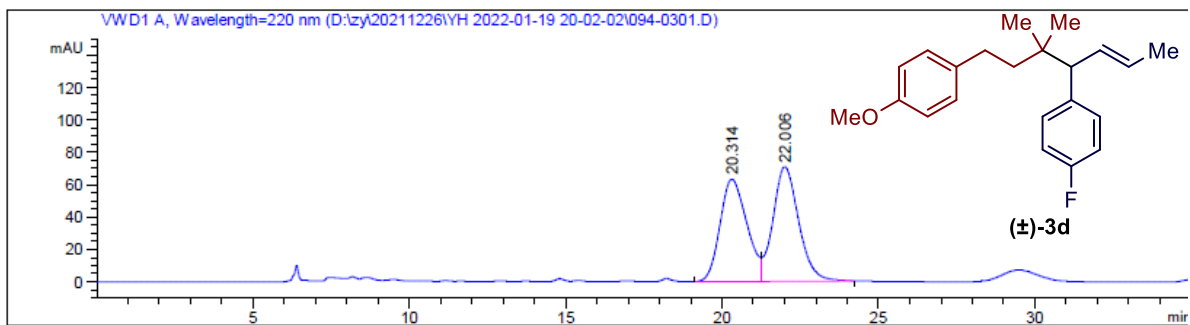

| 峰 # | 保留时间 [min] | 类型 | 峰宽 [min] | 峰面积 [mAU*s] | 峰高 [mAU] | 峰面积 %   |
|-----|------------|----|----------|-------------|----------|---------|
| 1   | 20.314     | BV | 0.8817   | 3759.93237  | 63.05514 | 48.1096 |
| 2   | 22.006     | VB | 0.8625   | 4055.42114  | 70.67263 | 51.8904 |

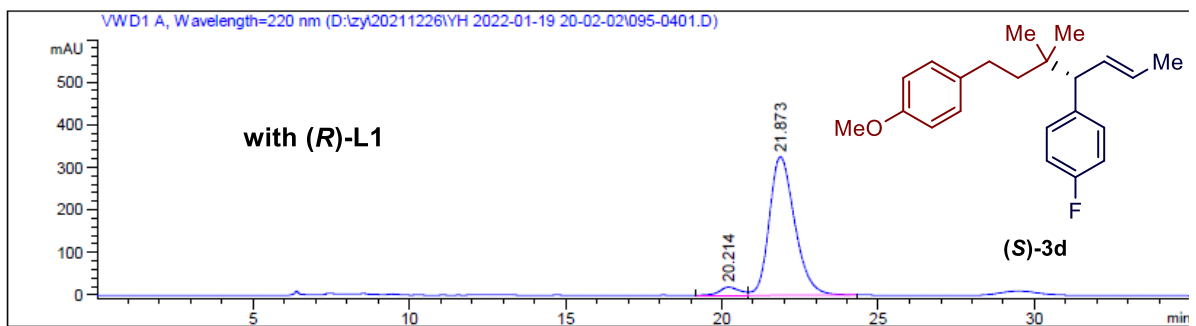

| 峰 # | 保留时间 [min] | 类型 | 峰宽 [min] | 峰面积 [mAU*s] | 峰高 [mAU]  | 峰面积 %   |
|-----|------------|----|----------|-------------|-----------|---------|
| 1   | 20.214     | BV | 0.6258   | 850.14056   | 19.22800  | 4.4110  |
| 2   | 21.873     | VB | 0.8602   | 1.84231e4   | 325.54718 | 95.5890 |

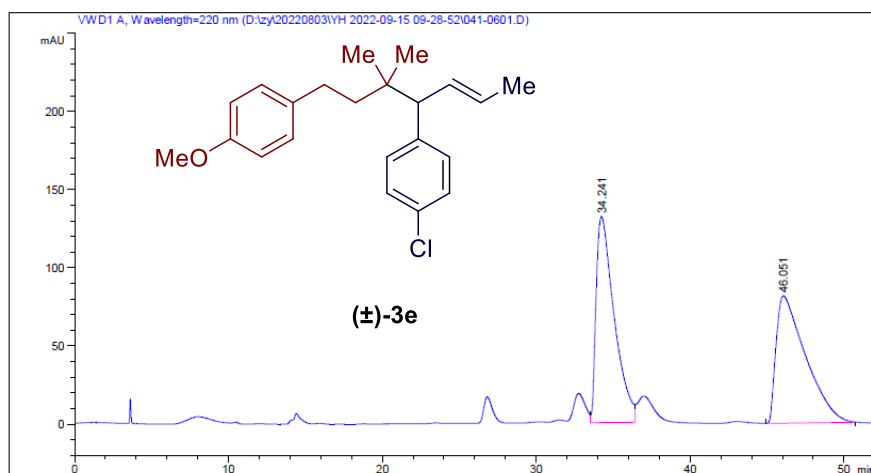

| 峰 # | 保留时间 [min] | 类型 | 峰宽 [min] | 峰面积 [mAU*s] | 峰高 [mAU]  | 峰面积 %   |
|-----|------------|----|----------|-------------|-----------|---------|
| 1   | 34.241     | VV | 0.9618   | 1.07870e4   | 132.07971 | 49.8999 |
| 2   | 46.051     | BB | 1.5589   | 1.08303e4   | 81.52178  | 50.1001 |

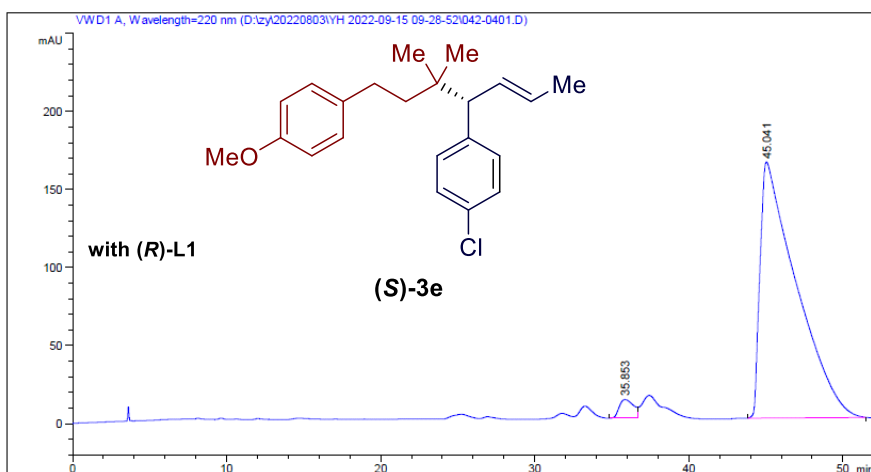

| 峰 # | 保留时间 [min] | 类型 | 峰宽 [min] | 峰面积 [mAU*s] | 峰高 [mAU]  | 峰面积 %   |
|-----|------------|----|----------|-------------|-----------|---------|
| 1   | 35.853     | BV | 0.7586   | 776.34174   | 12.01866  | 2.8087  |
| 2   | 45.041     | BB | 1.9308   | 2.68641e4   | 164.19289 | 97.1913 |

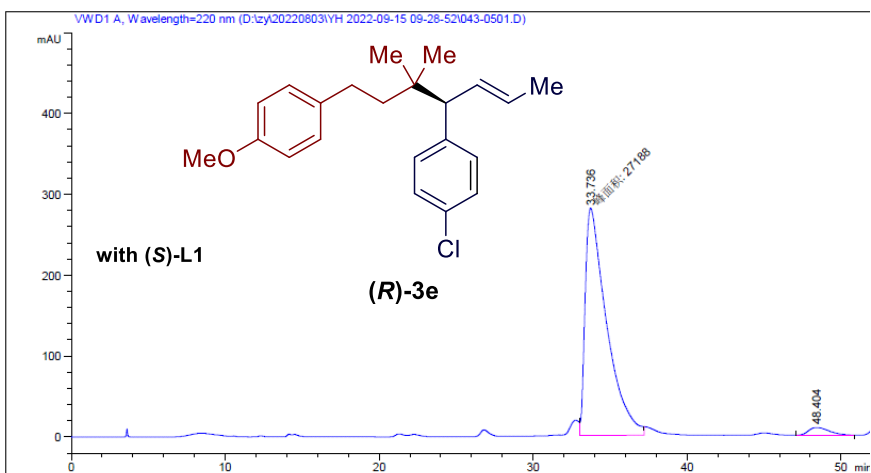

| 峰 # | 保留时间 [min] | 类型 | 峰宽 [min] | 峰面积 [mAU*s] | 峰高 [mAU]  | 峰面积 %   |
|-----|------------|----|----------|-------------|-----------|---------|
| 1   | 33.736     | MF | 1.6108   | 2.71880e4   | 281.30637 | 96.7880 |
| 2   | 48.404     | BB | 1.0898   | 902.25824   | 9.70365   | 3.2120  |

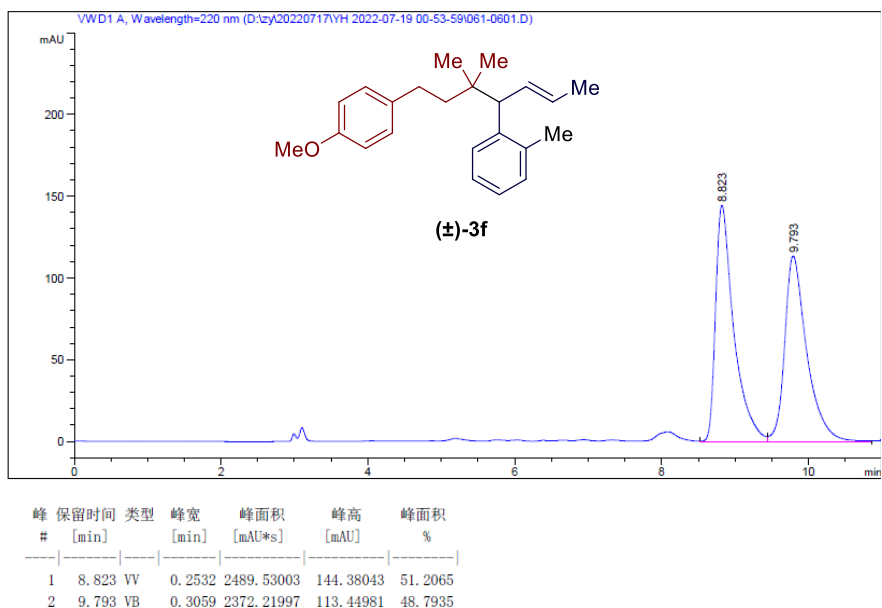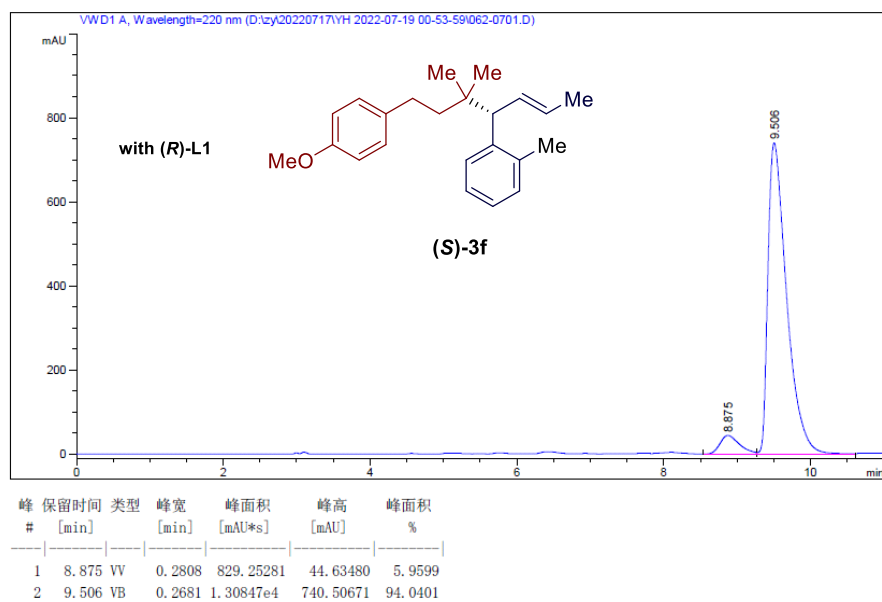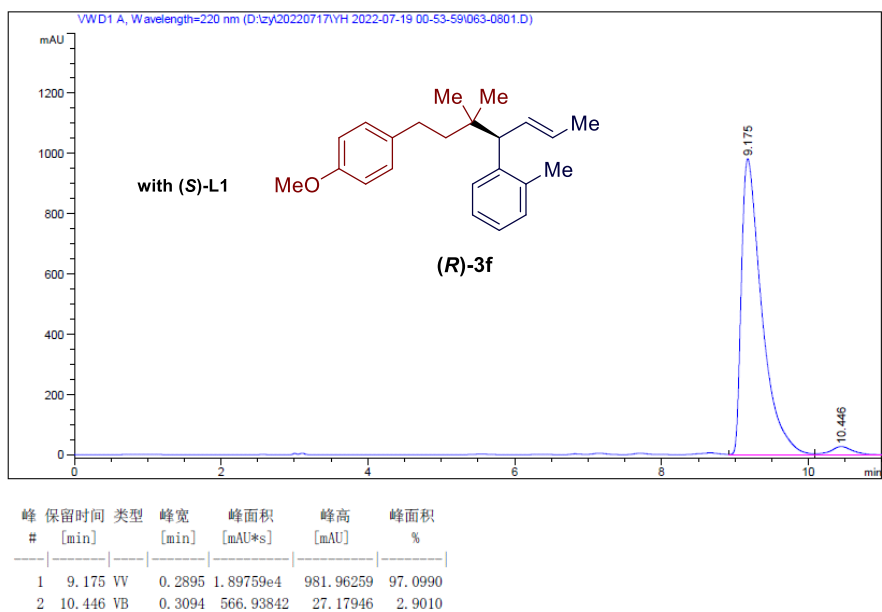

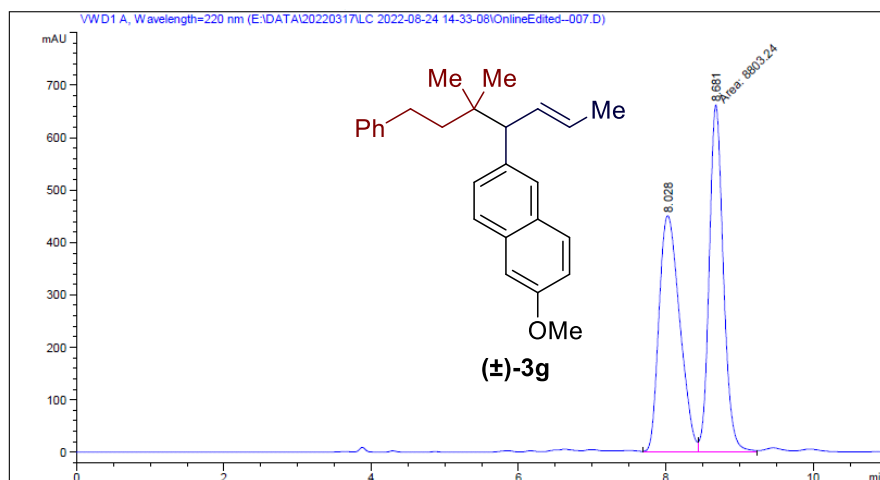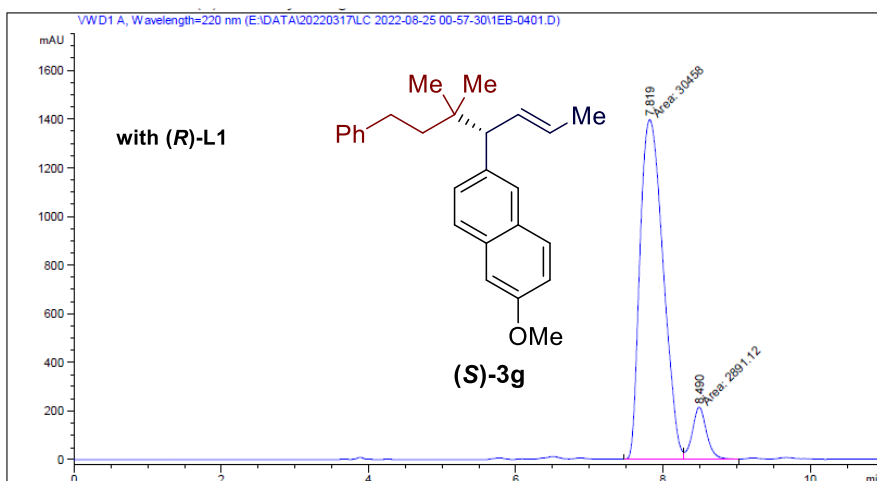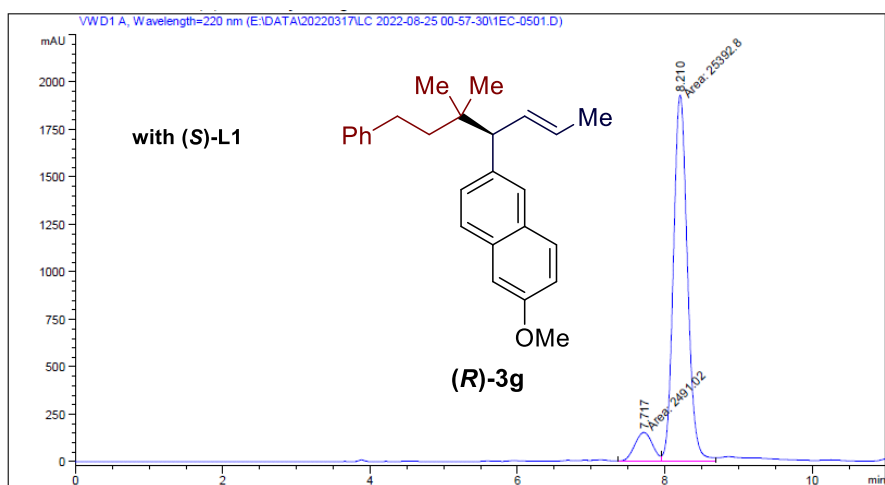

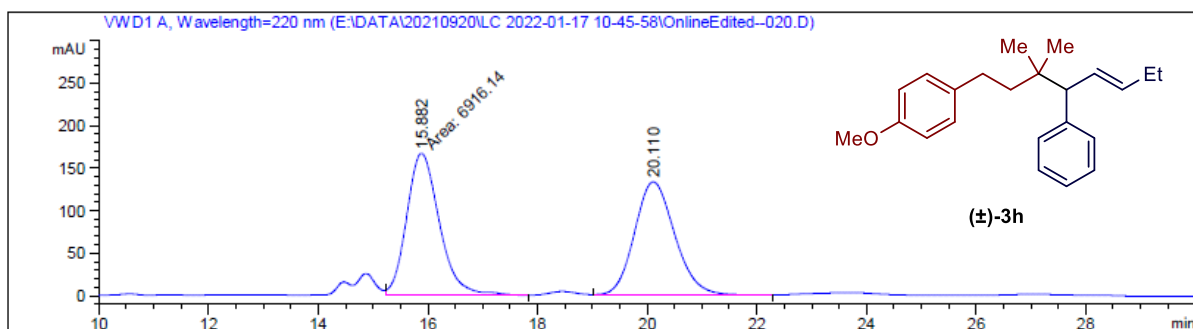

| Peak # | RetTime [min] | Type | Width [min] | Area [mAU*s] | Height [mAU] | Area %  |
|--------|---------------|------|-------------|--------------|--------------|---------|
| 1      | 15.882        | FM   | 0.6904      | 6916.13867   | 166.96463    | 50.6442 |
| 2      | 20.110        | BB   | 0.7862      | 6740.19824   | 132.78203    | 49.3558 |

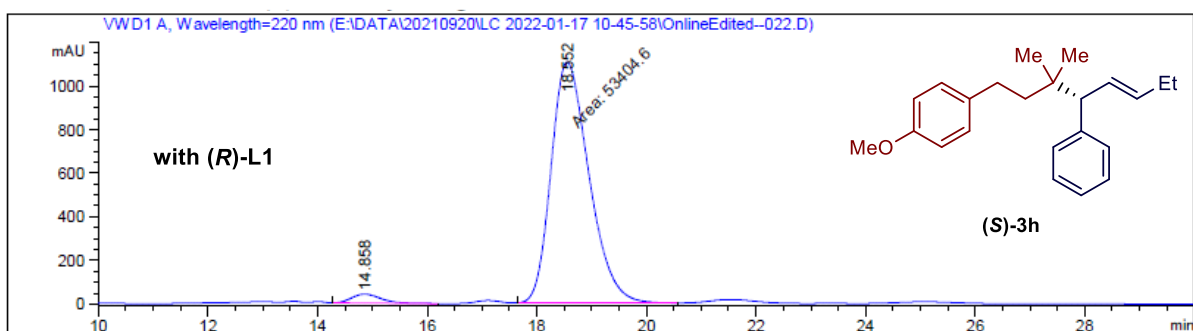

| Peak # | RetTime [min] | Type | Width [min] | Area [mAU*s] | Height [mAU] | Area %  |
|--------|---------------|------|-------------|--------------|--------------|---------|
| 1      | 14.858        | BB   | 0.5735      | 1518.11206   | 40.94632     | 2.7641  |
| 2      | 18.552        | FM   | 0.8036      | 5.34046e4    | 1107.59863   | 97.2359 |

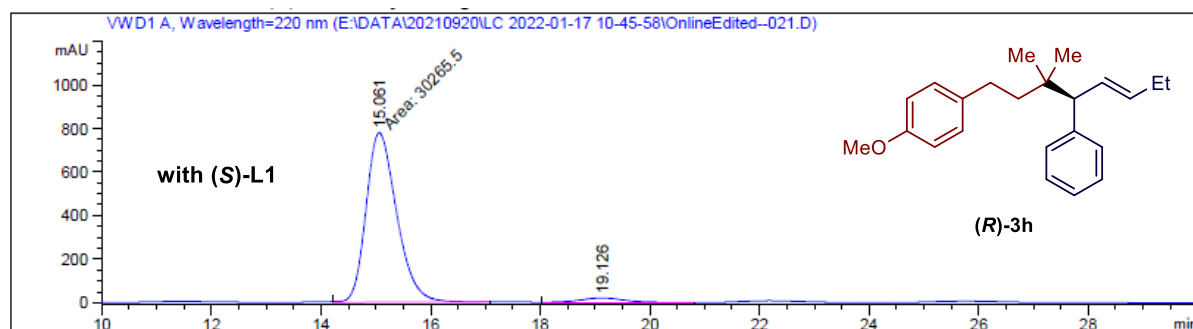

| Peak # | RetTime [min] | Type | Width [min] | Area [mAU*s] | Height [mAU] | Area %  |
|--------|---------------|------|-------------|--------------|--------------|---------|
| 1      | 15.061        | FM   | 0.6471      | 3.02655e4    | 779.50464    | 96.5549 |
| 2      | 19.126        | BB   | 0.7990      | 1079.88989   | 20.51896     | 3.4451  |

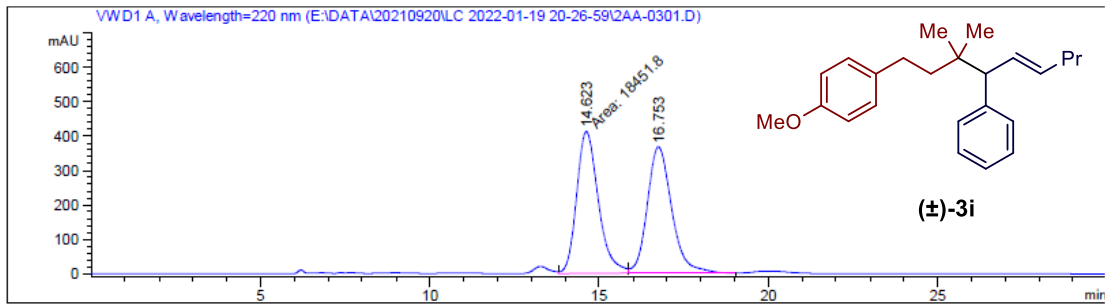

| Peak # | RetTime [min] | Type | Width [min] | Area [mAU*s] | Height [mAU] | Area %  |
|--------|---------------|------|-------------|--------------|--------------|---------|
| 1      | 14.623        | FM   | 0.7452      | 1.84518e4    | 412.69940    | 49.9744 |
| 2      | 16.753        | VB   | 0.7721      | 1.84707e4    | 367.65771    | 50.0256 |

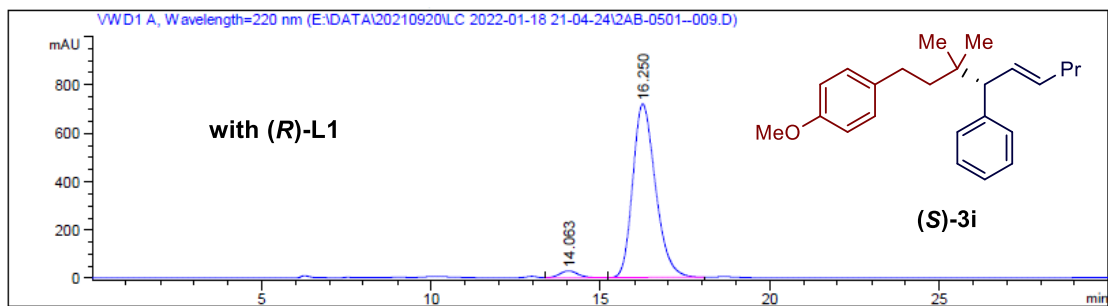

| Peak # | RetTime [min] | Type | Width [min] | Area [mAU*s] | Height [mAU] | Area %  |
|--------|---------------|------|-------------|--------------|--------------|---------|
| 1      | 14.063        | VB   | 0.5995      | 1133.54663   | 29.03459     | 3.2602  |
| 2      | 16.250        | BB   | 0.7211      | 3.36352e4    | 718.59766    | 96.7398 |



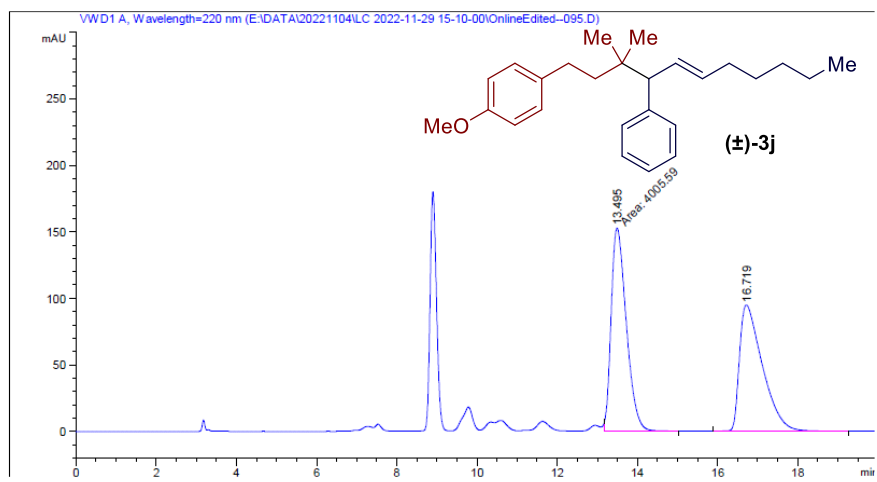

| Peak # | RetTime [min] | Type | Width [min] | Area [mAU*s] | Height [mAU] | Area %  |
|--------|---------------|------|-------------|--------------|--------------|---------|
| 1      | 13.495        | FM   | 0.4373      | 4005.58545   | 152.65329    | 51.6836 |
| 2      | 16.719        | BB   | 0.5918      | 3744.61743   | 94.81467     | 48.3164 |

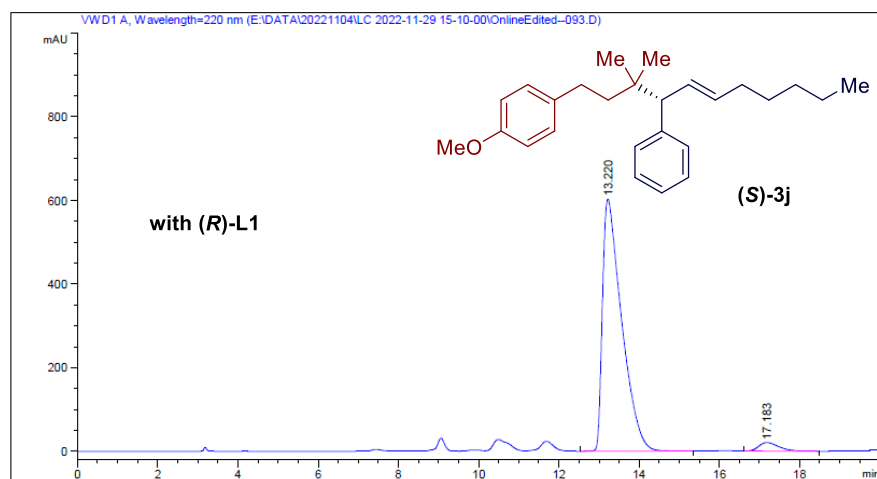

| Peak # | RetTime [min] | Type | Width [min] | Area [mAU*s] | Height [mAU] | Area %  |
|--------|---------------|------|-------------|--------------|--------------|---------|
| 1      | 13.220        | BB   | 0.4881      | 1.99968e4    | 602.73242    | 96.6700 |
| 2      | 17.183        | BB   | 0.5256      | 688.83740    | 20.11166     | 3.3300  |

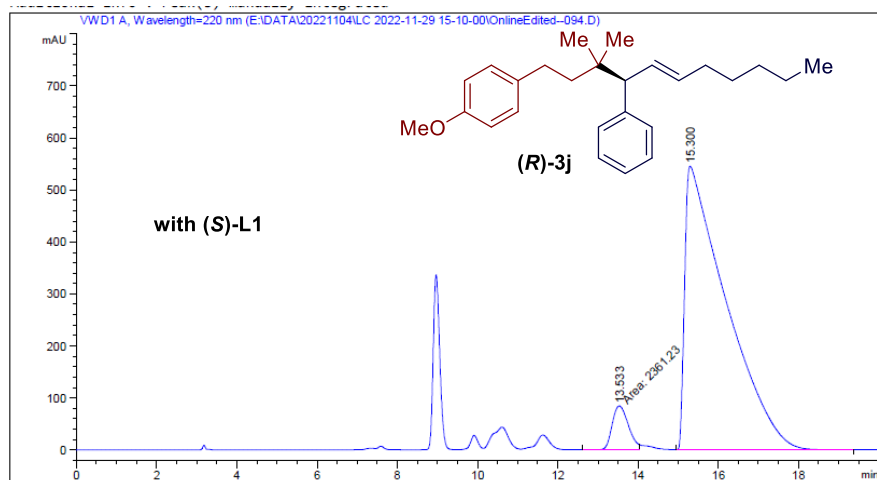

| Peak # | RetTime [min] | Type | Width [min] | Area [mAU*s] | Height [mAU] | Area %  |
|--------|---------------|------|-------------|--------------|--------------|---------|
| 1      | 13.533        | MF   | 0.4676      | 2361.23193   | 84.16882     | 5.6944  |
| 2      | 15.300        | VB   | 0.9629      | 3.91047e4    | 545.11444    | 94.3056 |

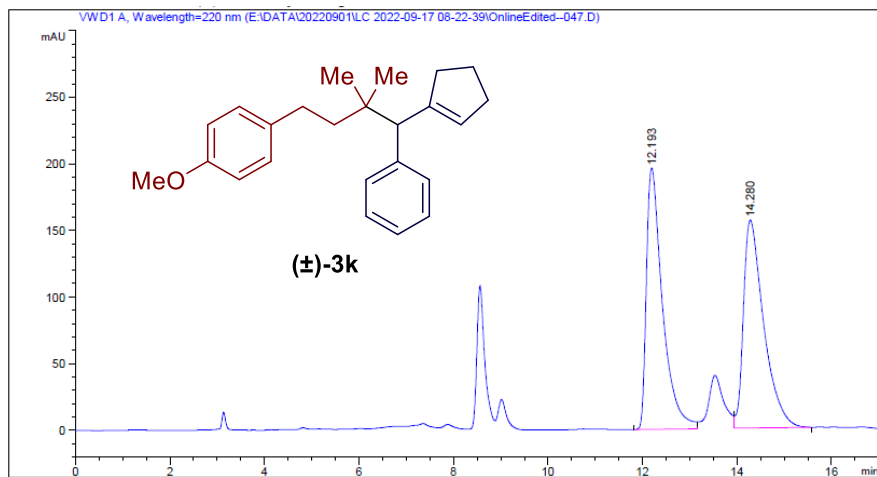

| Peak # | RetTime [min] | Type | Width [min] | Area [mAU*s] | Height [mAU] | Area %  |
|--------|---------------|------|-------------|--------------|--------------|---------|
| 1      | 12.193        | BV   | 0.3509      | 4642.11621   | 196.29243    | 49.9580 |
| 2      | 14.280        | VB   | 0.4447      | 4649.91455   | 156.00333    | 50.0420 |

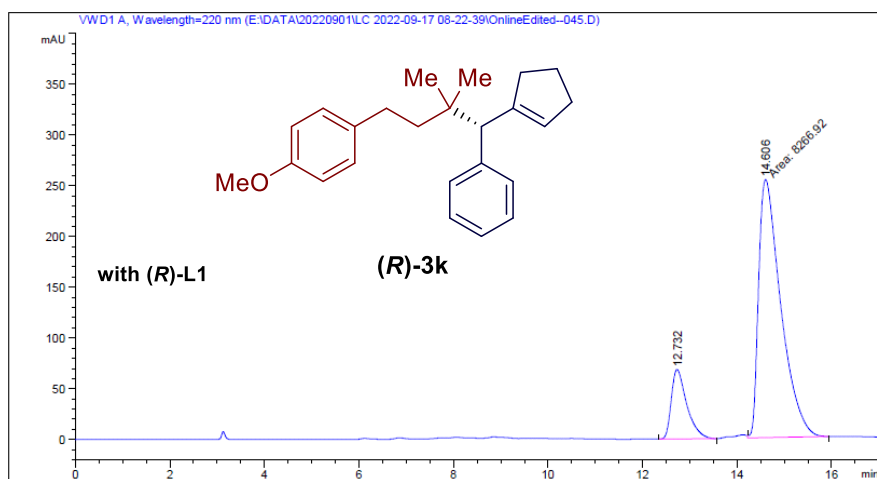

| Peak # | RetTime [min] | Type | Width [min] | Area [mAU*s] | Height [mAU] | Area %  |
|--------|---------------|------|-------------|--------------|--------------|---------|
| 1      | 12.732        | BB   | 0.3406      | 1551.86694   | 68.41867     | 15.8051 |
| 2      | 14.606        | FM   | 0.5422      | 8266.91992   | 254.13066    | 84.1949 |

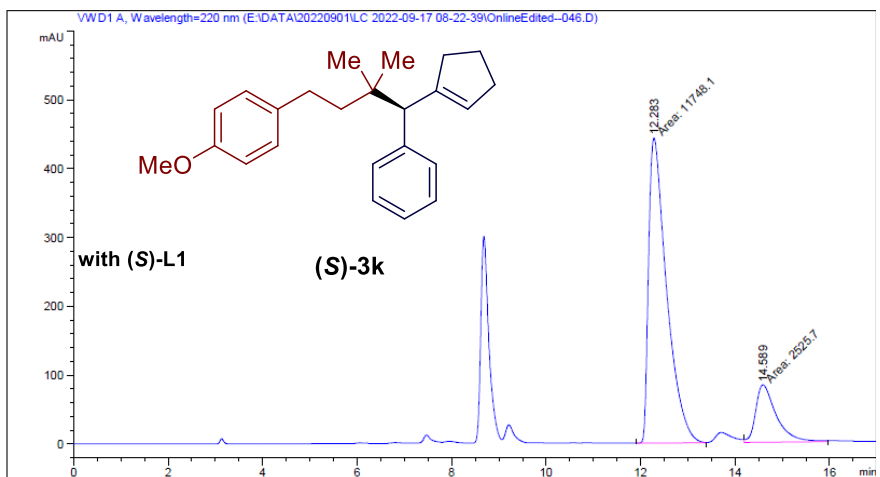

| Peak # | RetTime [min] | Type | Width [min] | Area [mAU*s] | Height [mAU] | Area %  |
|--------|---------------|------|-------------|--------------|--------------|---------|
| 1      | 12.283        | FM   | 0.4413      | 1.17481e4    | 443.68225    | 82.3054 |
| 2      | 14.589        | MF   | 0.5047      | 2525.70483   | 83.39798     | 17.6946 |

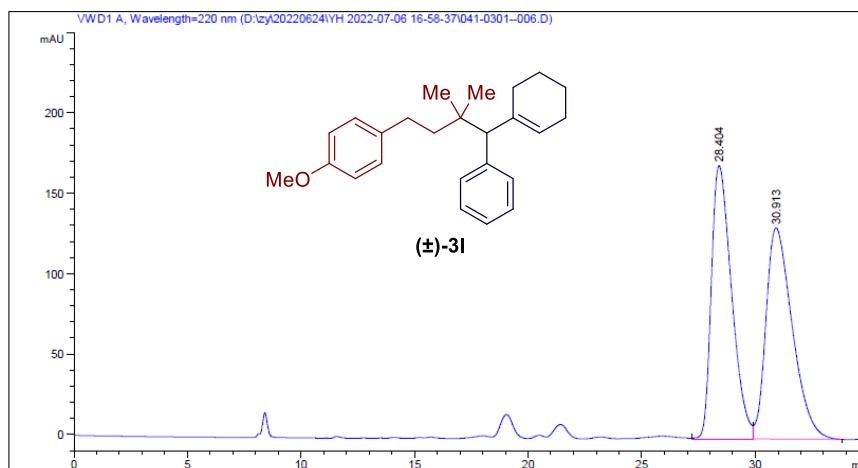

| 峰 # | 保留时间 [min] | 类型 | 峰宽 [min] | 峰面积 [mAU*s] | 峰高 [mAU]  | 峰面积 %   |
|-----|------------|----|----------|-------------|-----------|---------|
| 1   | 28.404     | VV | 0.9274   | 1.05045e4   | 169.89044 | 49.7828 |
| 2   | 30.913     | VB | 1.1440   | 1.05962e4   | 131.36908 | 50.2172 |

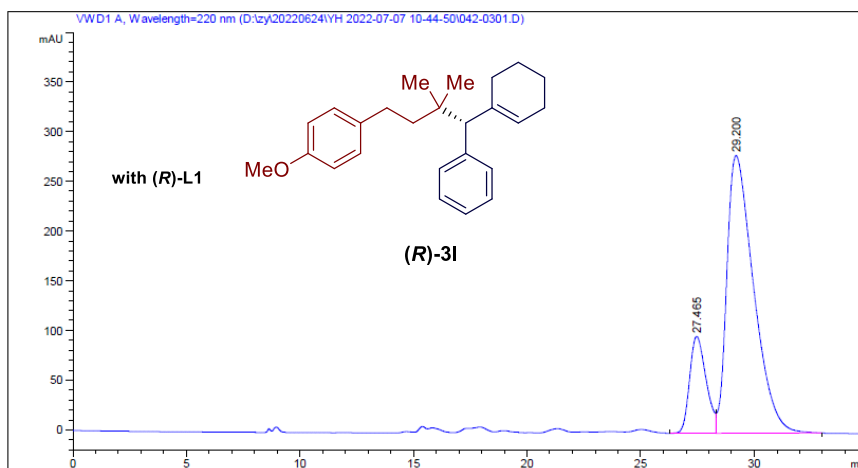

| 峰 # | 保留时间 [min] | 类型 | 峰宽 [min] | 峰面积 [mAU*s] | 峰高 [mAU]  | 峰面积 %   |
|-----|------------|----|----------|-------------|-----------|---------|
| 1   | 27.465     | VV | 0.7487   | 4917.62012  | 97.45625  | 17.6842 |
| 2   | 29.200     | VB | 1.1570   | 2.28903e4   | 279.34198 | 82.3158 |

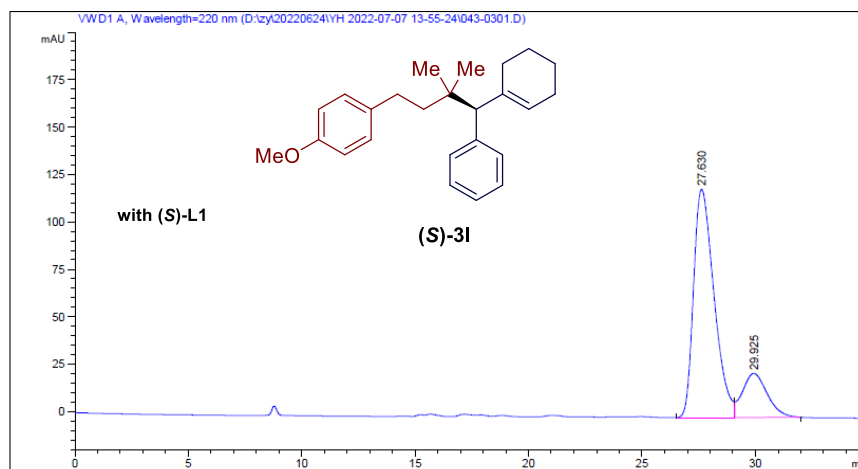

| 峰 # | 保留时间 [min] | 类型 | 峰宽 [min] | 峰面积 [mAU*s] | 峰高 [mAU]  | 峰面积 %   |
|-----|------------|----|----------|-------------|-----------|---------|
| 1   | 27.630     | BV | 0.9121   | 7553.36621  | 120.37693 | 80.9813 |
| 2   | 29.925     | VB | 0.9330   | 1773.93018  | 23.22763  | 19.0187 |

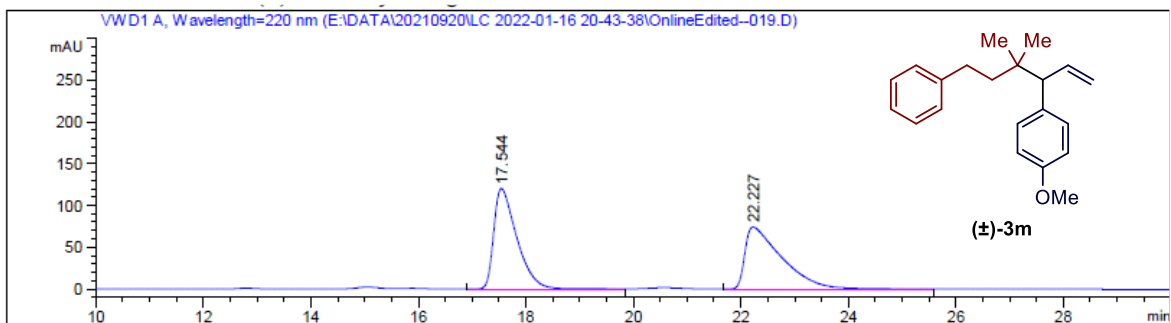

| Peak # | RetTime [min] | Type | Width [min] | Area [mAU*s] | Height [mAU] | Area %  |
|--------|---------------|------|-------------|--------------|--------------|---------|
| 1      | 17.544        | BB   | 0.4452      | 3598.37817   | 120.55315    | 50.3979 |
| 2      | 22.227        | BB   | 0.6794      | 3541.55298   | 74.39710     | 49.6021 |

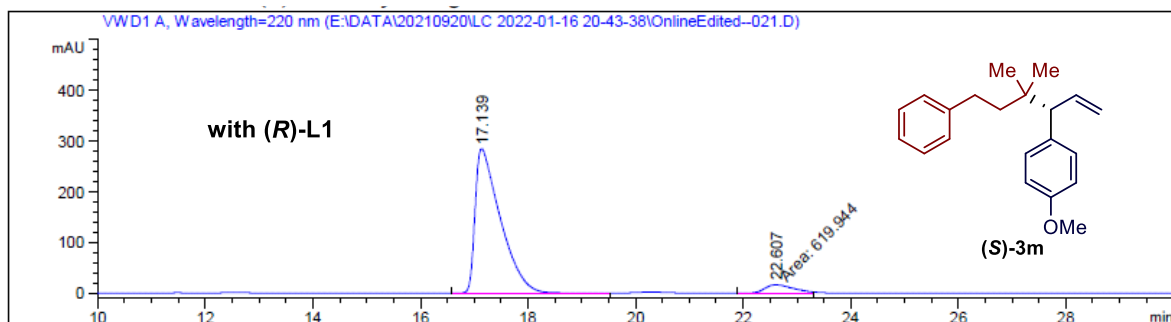

| Peak # | RetTime [min] | Type | Width [min] | Area [mAU*s] | Height [mAU] | Area %  |
|--------|---------------|------|-------------|--------------|--------------|---------|
| 1      | 17.139        | BB   | 0.4737      | 9252.26563   | 284.26569    | 93.7203 |
| 2      | 22.607        | MF   | 0.6199      | 619.94385    | 16.66792     | 6.2797  |

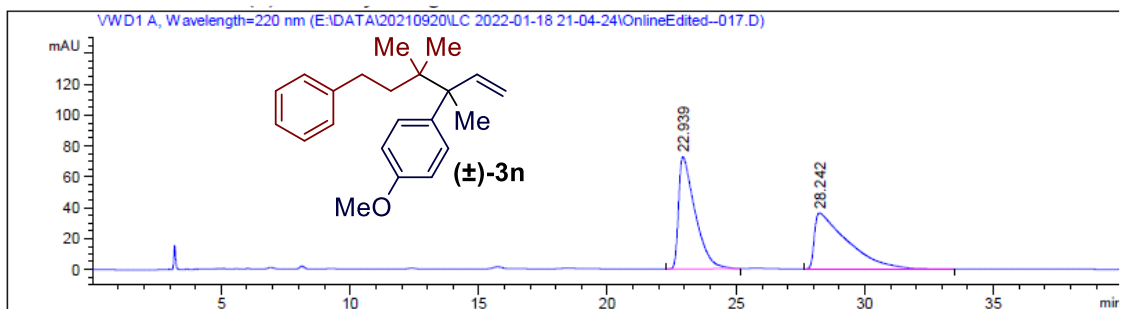

| Peak # | RetTime [min] | Type | Width [min] | Area [mAU*s] | Height [mAU] | Area %  |
|--------|---------------|------|-------------|--------------|--------------|---------|
| 1      | 22.939        | BB   | 0.6500      | 3239.38599   | 72.53445     | 50.1514 |
| 2      | 28.242        | BB   | 1.1781      | 3219.82861   | 36.25635     | 49.8486 |

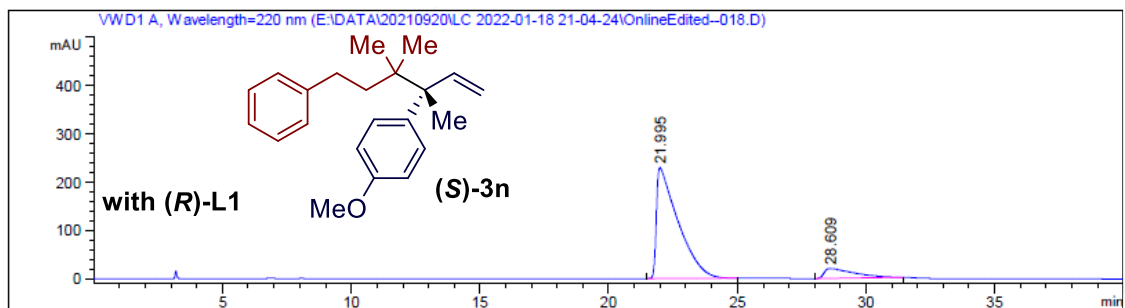

| Peak # | RetTime [min] | Type | Width [min] | Area [mAU*s] | Height [mAU] | Area %  |
|--------|---------------|------|-------------|--------------|--------------|---------|
| 1      | 21.995        | BB   | 0.8084      | 1.34040e4    | 228.81059    | 89.1556 |
| 2      | 28.609        | BB   | 1.0853      | 1630.39087   | 20.38013     | 10.8444 |

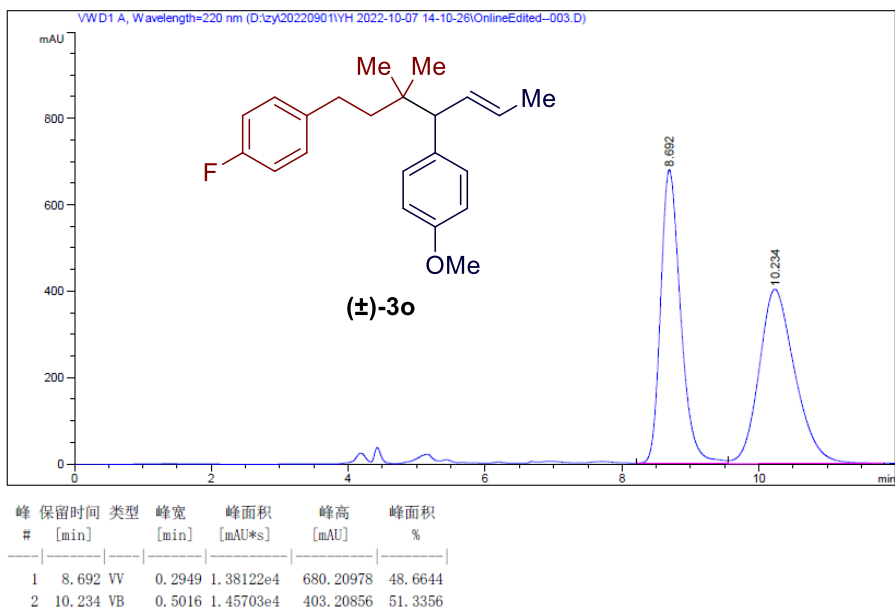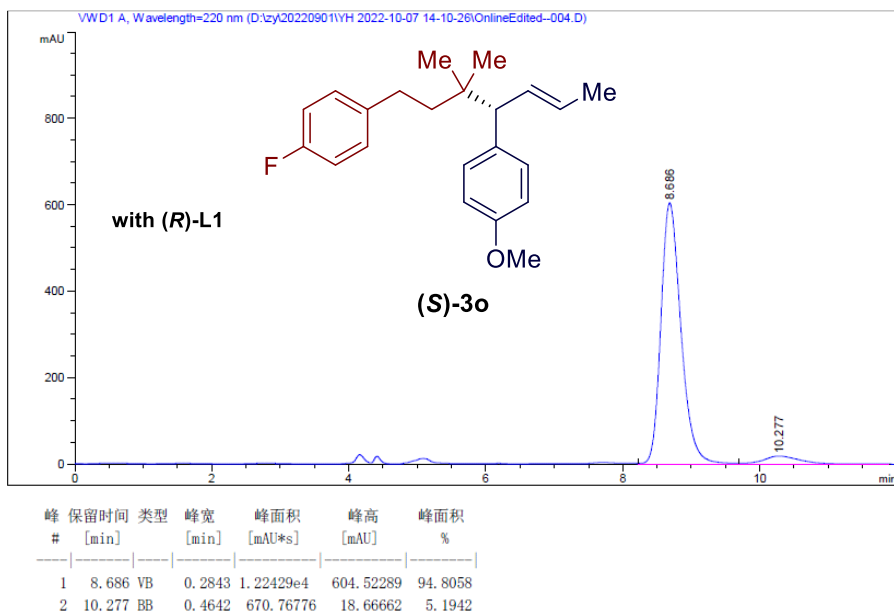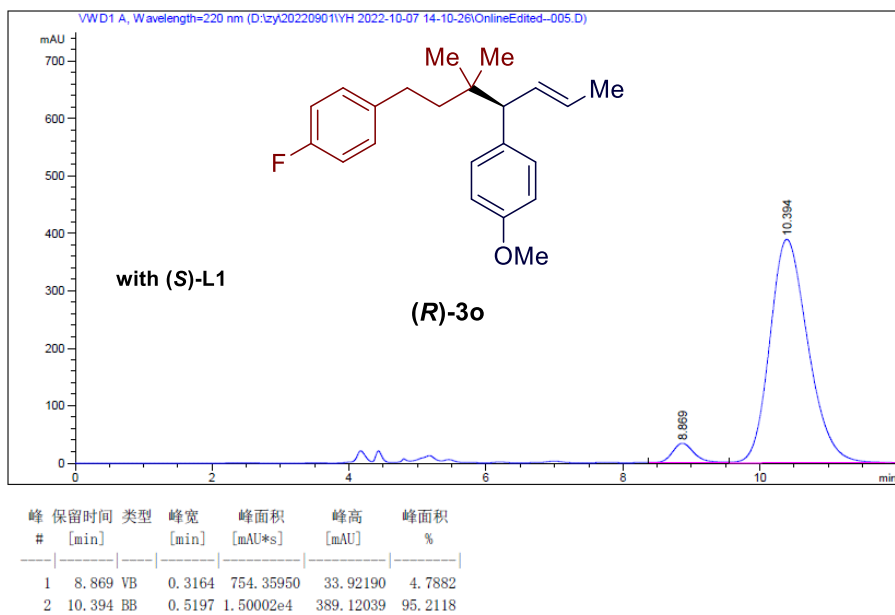

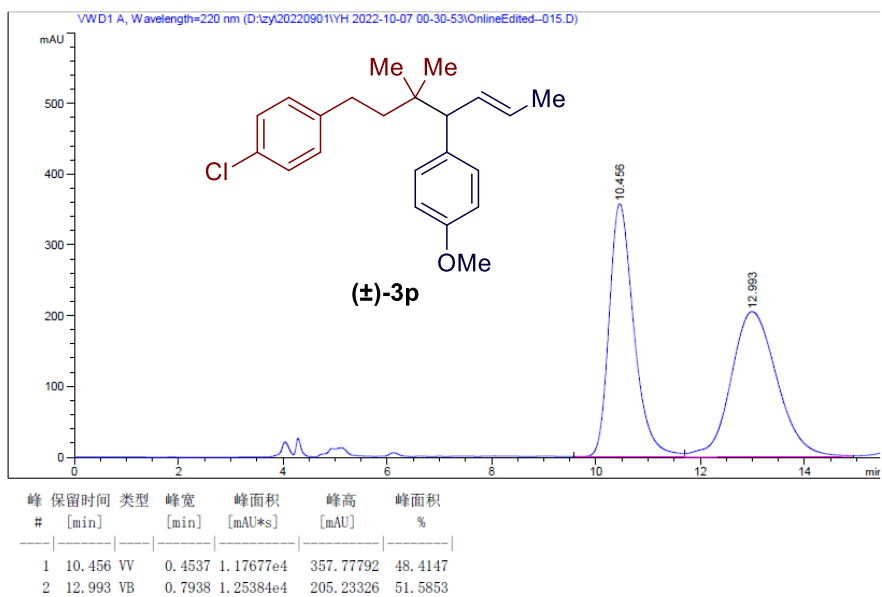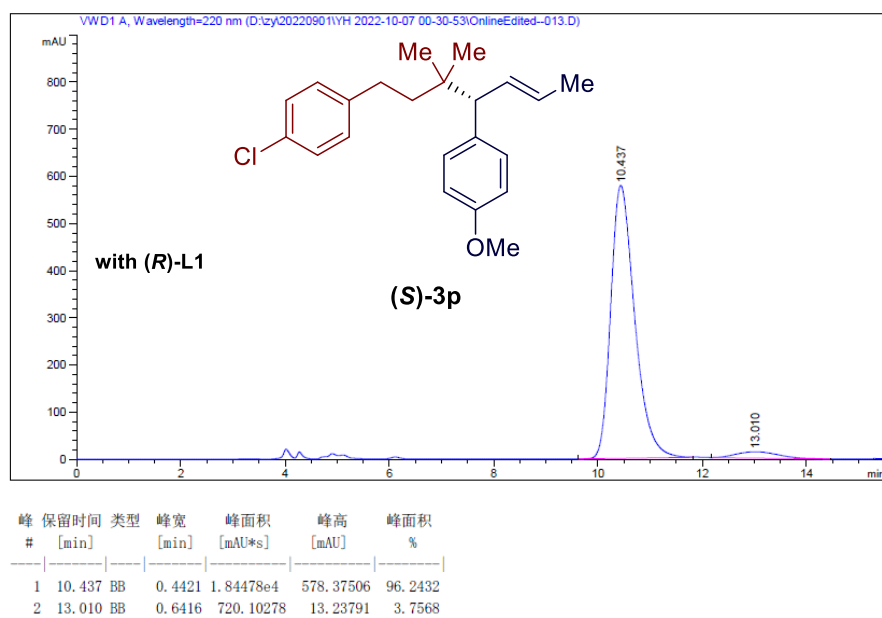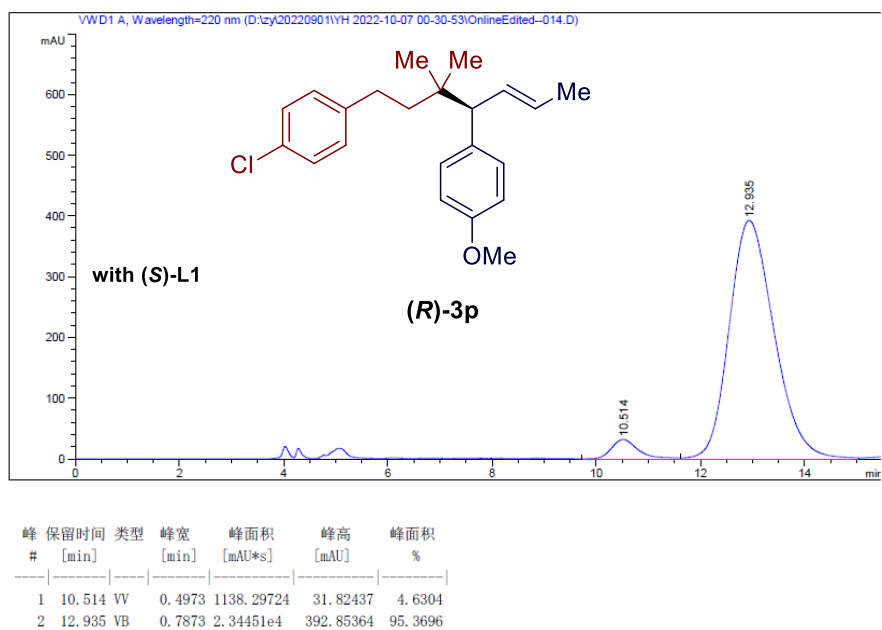

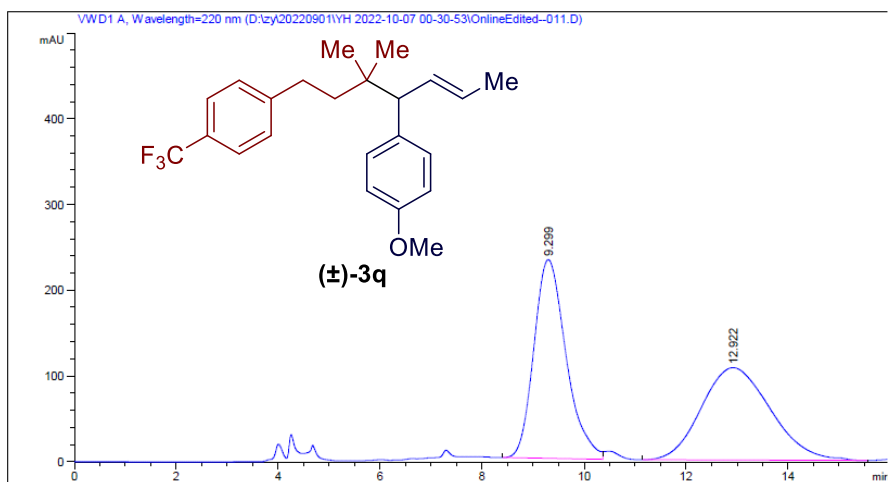

| 峰 # | 保留时间 [min] | 类型 | 峰宽 [min] | 峰面积 [mAU*s] | 峰高 [mAU]  | 峰面积 %   |
|-----|------------|----|----------|-------------|-----------|---------|
| 1   | 9.299      | BV | 0.5927   | 1.01700e4   | 231.89560 | 50.0997 |
| 2   | 12.922     | BB | 1.1636   | 1.01295e4   | 107.86082 | 49.9003 |

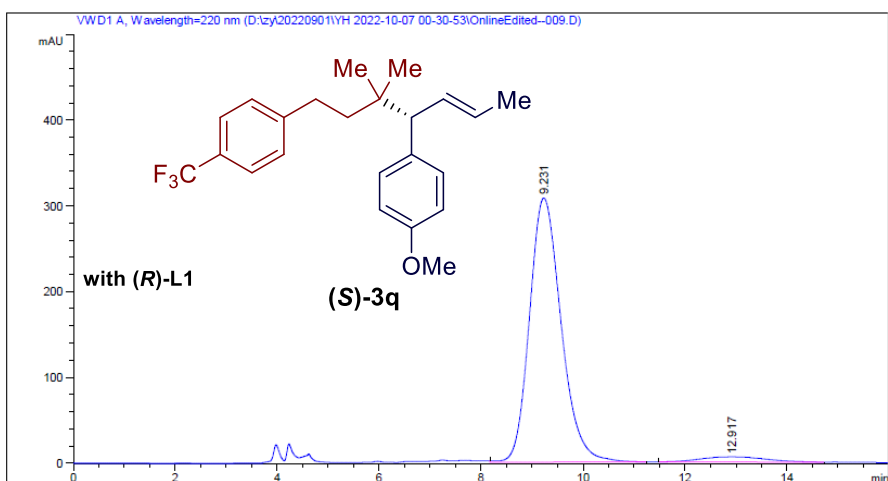

| 峰 # | 保留时间 [min] | 类型 | 峰宽 [min] | 峰面积 [mAU*s] | 峰高 [mAU]  | 峰面积 %   |
|-----|------------|----|----------|-------------|-----------|---------|
| 1   | 9.231      | VB | 0.6073   | 1.33137e4   | 307.98404 | 96.0494 |
| 2   | 12.917     | BV | 1.0558   | 547.60236   | 6.09148   | 3.9506  |

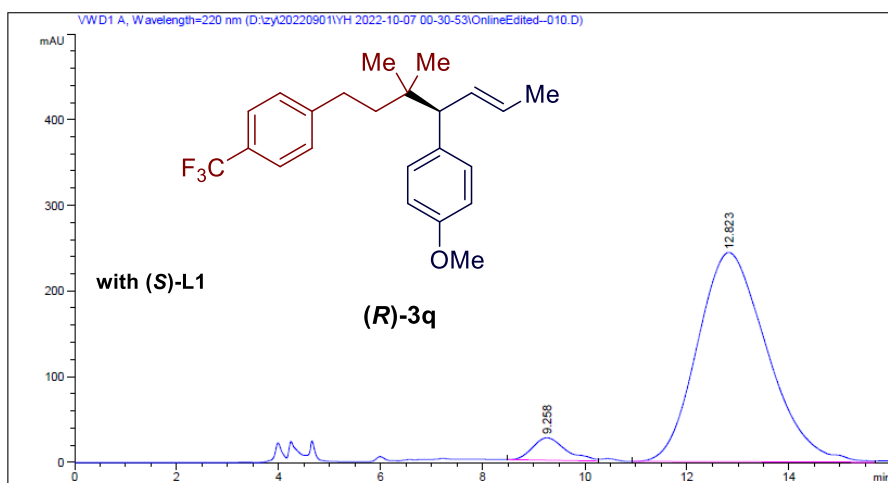

| 峰 # | 保留时间 [min] | 类型 | 峰宽 [min] | 峰面积 [mAU*s] | 峰高 [mAU]  | 峰面积 %   |
|-----|------------|----|----------|-------------|-----------|---------|
| 1   | 9.258      | BV | 0.5977   | 1188.54211  | 26.18013  | 4.9023  |
| 2   | 12.823     | VB | 1.2033   | 2.30558e4   | 244.23891 | 95.0977 |



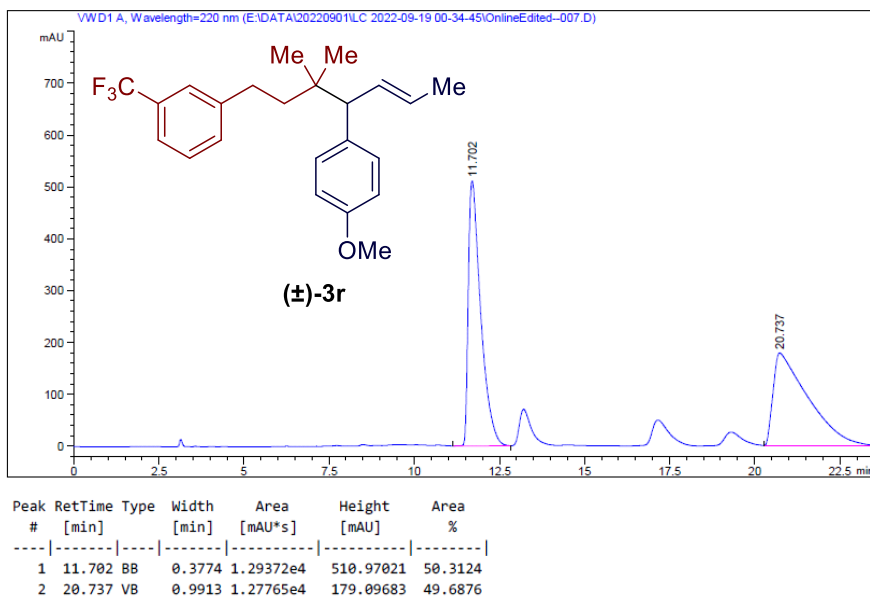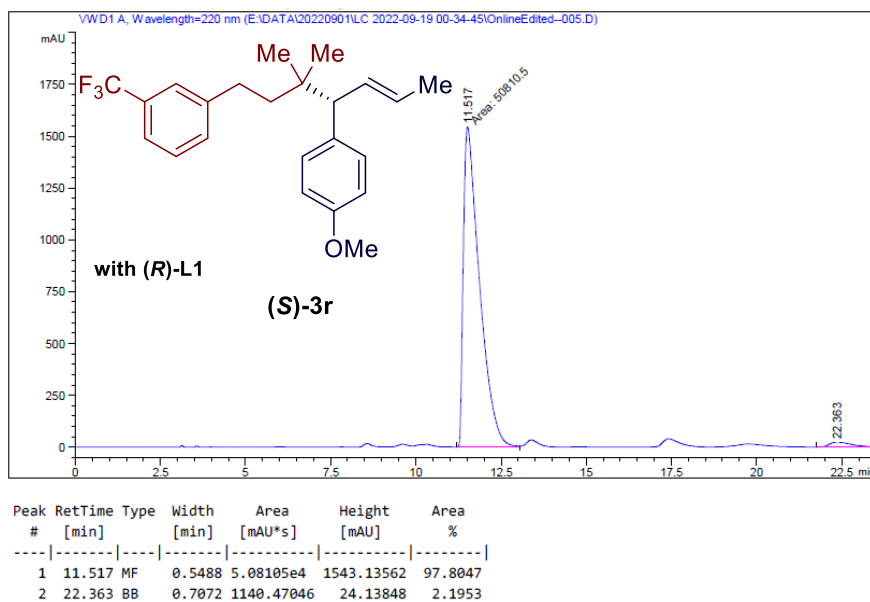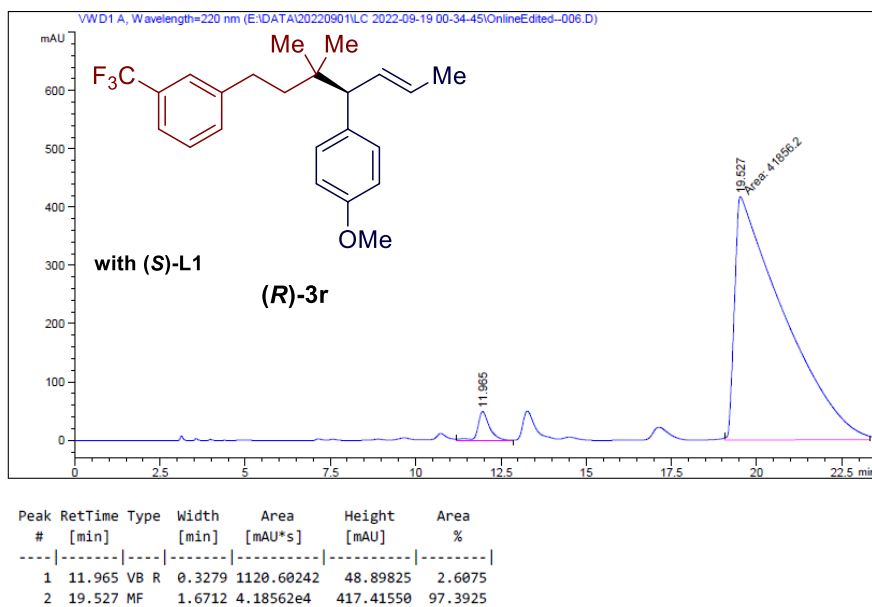

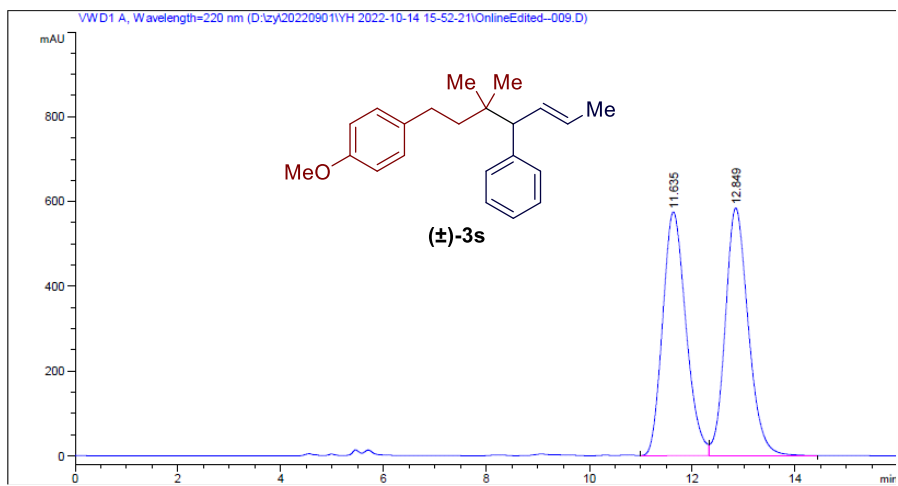

| 峰 # | 保留时间 [min] | 类型 | 峰宽 [min] | 峰面积 [mAU*s] | 峰高 [mAU]  | 峰面积 %   |
|-----|------------|----|----------|-------------|-----------|---------|
| 1   | 11.635     | VV | 0.4244   | 1.80617e4   | 575.03711 | 49.8387 |
| 2   | 12.849     | VB | 0.4201   | 1.81786e4   | 584.11682 | 50.1613 |

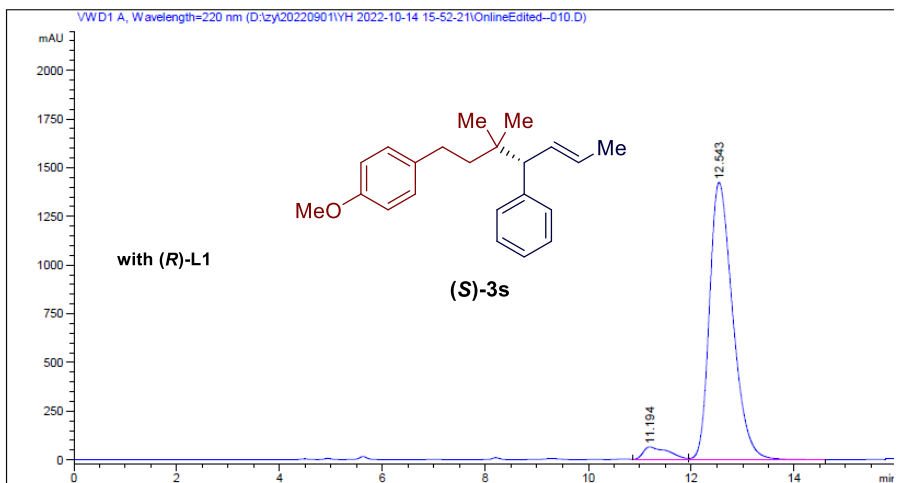

| 峰 # | 保留时间 [min] | 类型 | 峰宽 [min] | 峰面积 [mAU*s] | 峰高 [mAU]   | 峰面积 %   |
|-----|------------|----|----------|-------------|------------|---------|
| 1   | 11.194     | VV | 0.4597   | 2286.98975  | 66.08847   | 4.8750  |
| 2   | 12.543     | VB | 0.4346   | 4.46261e4   | 1424.19861 | 95.1250 |

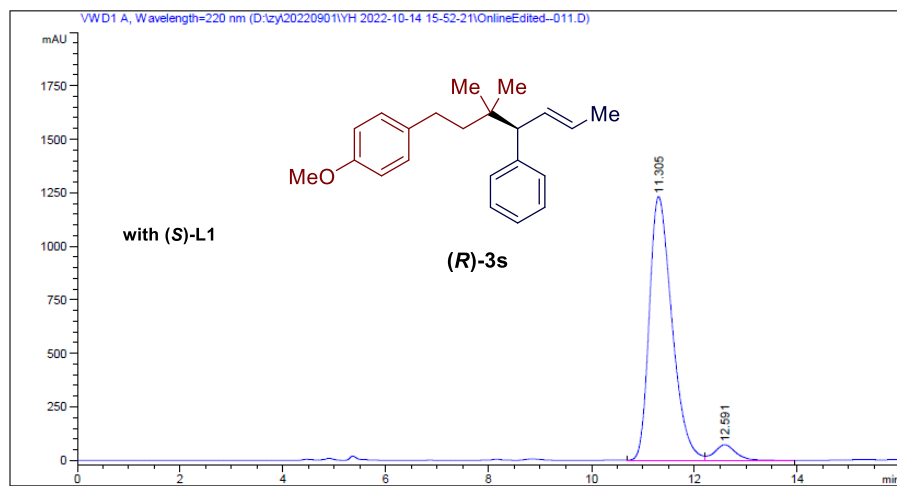

| 峰 # | 保留时间 [min] | 类型 | 峰宽 [min] | 峰面积 [mAU*s] | 峰高 [mAU]   | 峰面积 %   |
|-----|------------|----|----------|-------------|------------|---------|
| 1   | 11.305     | VV | 0.4257   | 3.76744e4   | 1232.35144 | 94.7490 |
| 2   | 12.591     | VB | 0.3940   | 2087.92236  | 72.49850   | 5.2510  |

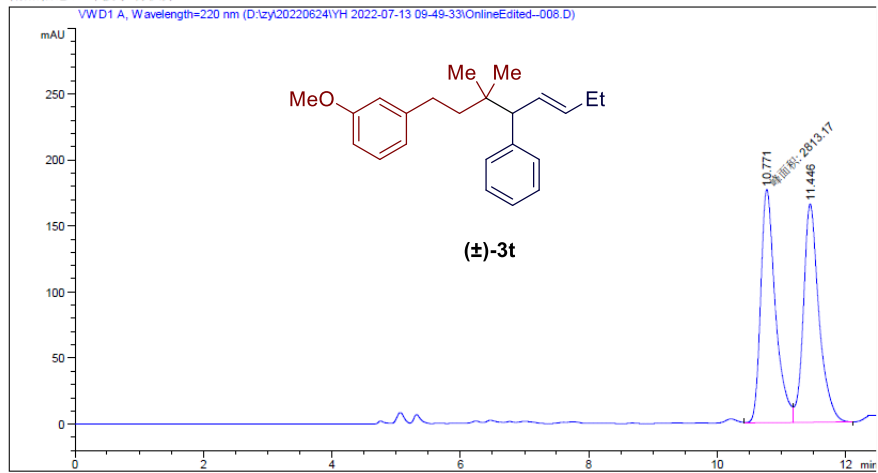

| 峰 # | 保留时间 [min] | 类型 | 峰宽 [min] | 峰面积 [mAU*s] | 峰高 [mAU]  | 峰面积 %   |
|-----|------------|----|----------|-------------|-----------|---------|
| 1   | 10.771     | FM | 0.2652   | 2813.16846  | 176.77815 | 50.2587 |
| 2   | 11.446     | VB | 0.2498   | 2784.21143  | 165.47011 | 49.7413 |

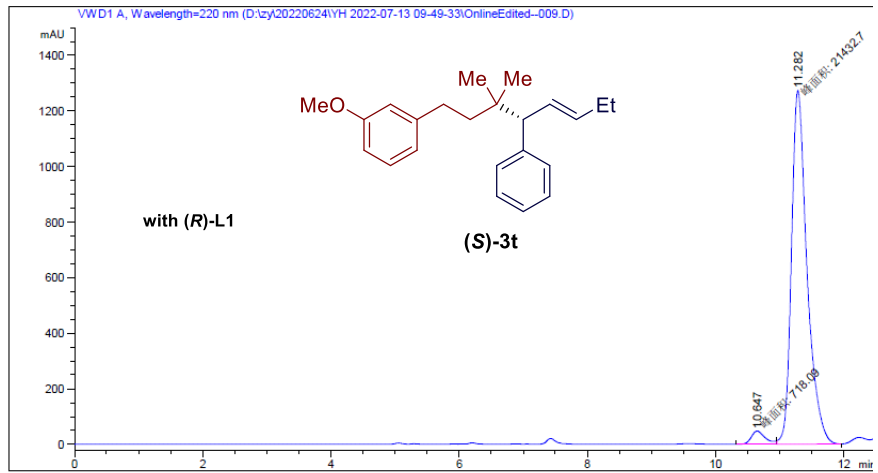

| 峰 # | 保留时间 [min] | 类型 | 峰宽 [min] | 峰面积 [mAU*s] | 峰高 [mAU]   | 峰面积 %   |
|-----|------------|----|----------|-------------|------------|---------|
| 1   | 10.647     | MF | 0.2540   | 718.09027   | 47.12522   | 3.2418  |
| 2   | 11.282     | FM | 0.2810   | 2.14327e4   | 1271.21509 | 96.7582 |

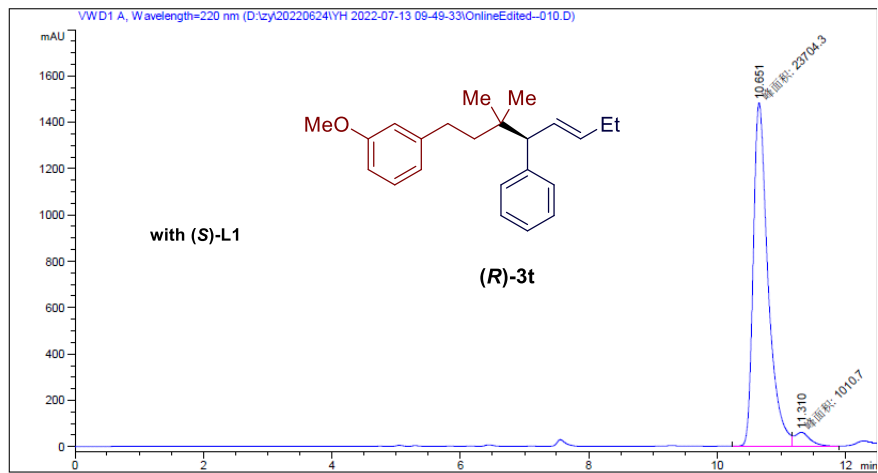

| 峰 # | 保留时间 [min] | 类型 | 峰宽 [min] | 峰面积 [mAU*s] | 峰高 [mAU]   | 峰面积 %   |
|-----|------------|----|----------|-------------|------------|---------|
| 1   | 10.651     | MF | 0.2666   | 2.37043e4   | 1482.07568 | 95.9106 |
| 2   | 11.310     | FM | 0.2851   | 1010.70020  | 59.07620   | 4.0894  |

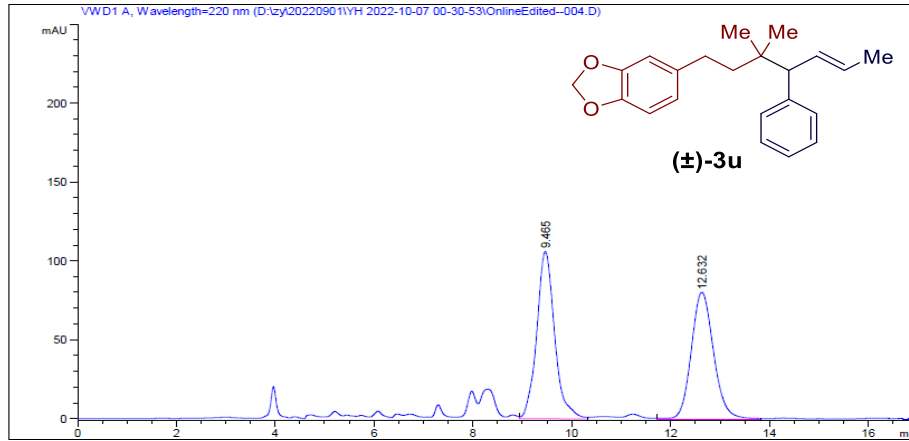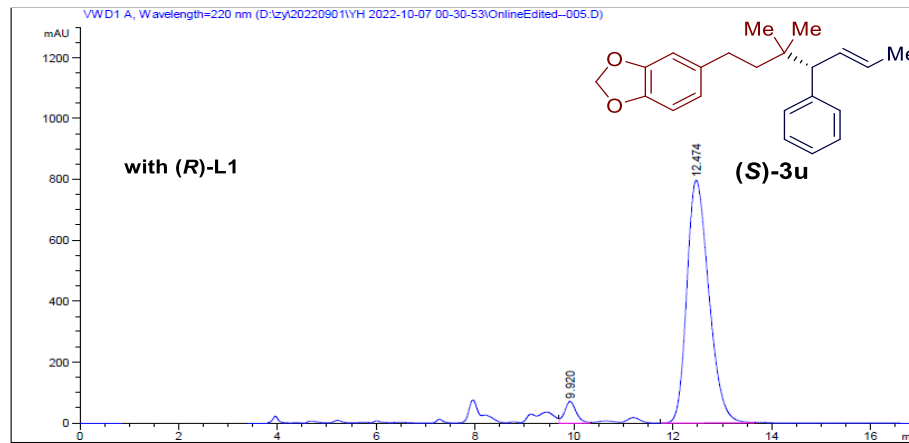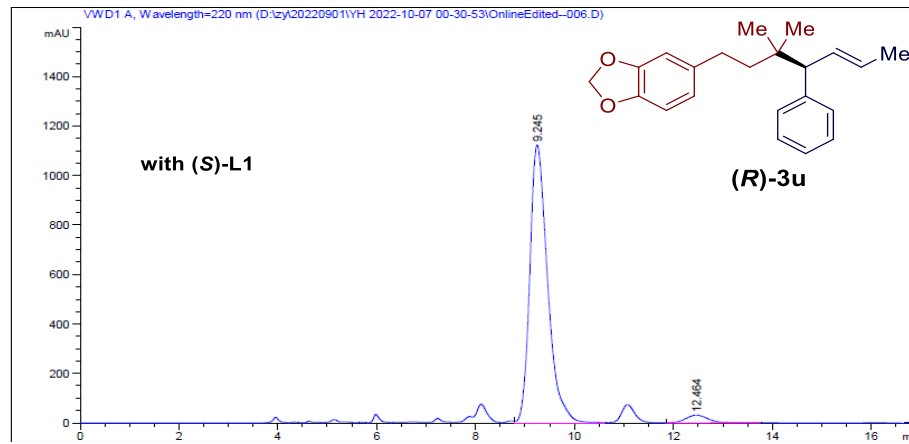

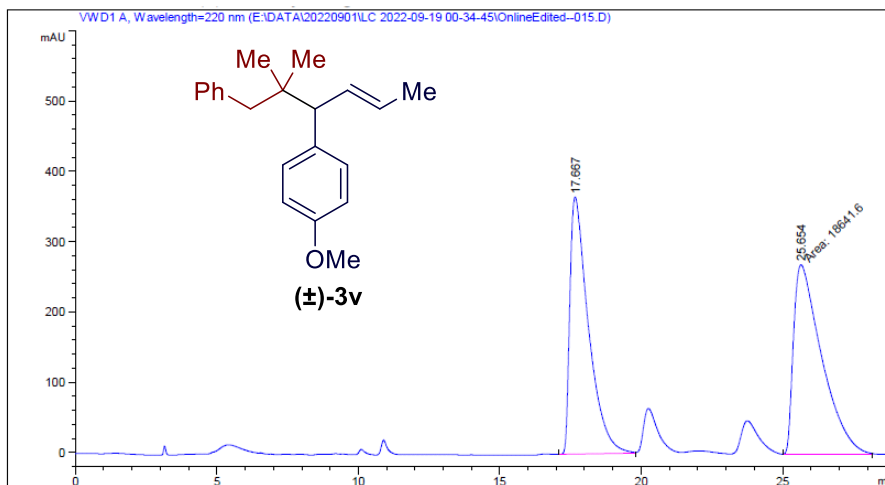

| Peak # | RetTime [min] | Type | Width [min] | Area [mAU*s] | Height [mAU] | Area %  |
|--------|---------------|------|-------------|--------------|--------------|---------|
| 1      | 17.667        | BV   | 0.6731      | 1.67232e4    | 365.98392    | 47.2876 |
| 2      | 25.654        | MF   | 1.1520      | 1.86416e4    | 269.70810    | 52.7124 |

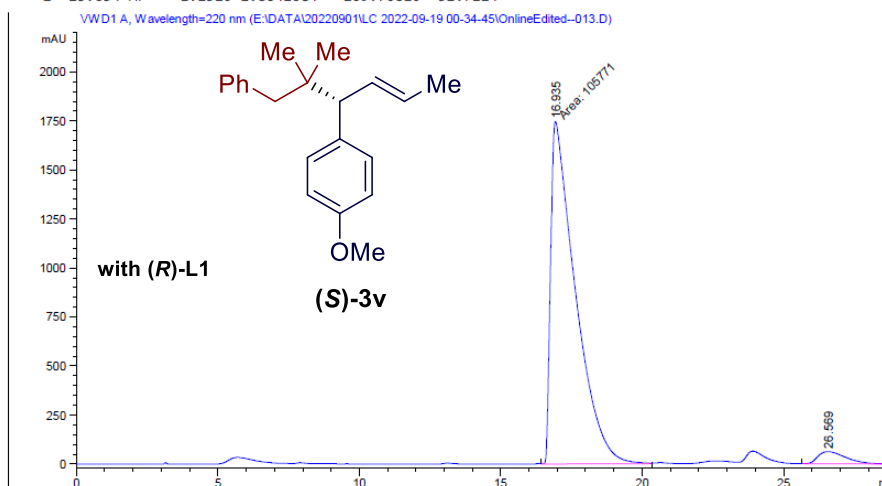

| Peak # | RetTime [min] | Type | Width [min] | Area [mAU*s] | Height [mAU] | Area %  |
|--------|---------------|------|-------------|--------------|--------------|---------|
| 1      | 16.935        | MF   | 1.0096      | 1.05771e5    | 1746.17456   | 96.1289 |
| 2      | 26.569        | BB   | 1.0519      | 4259.40869   | 62.20335     | 3.8711  |

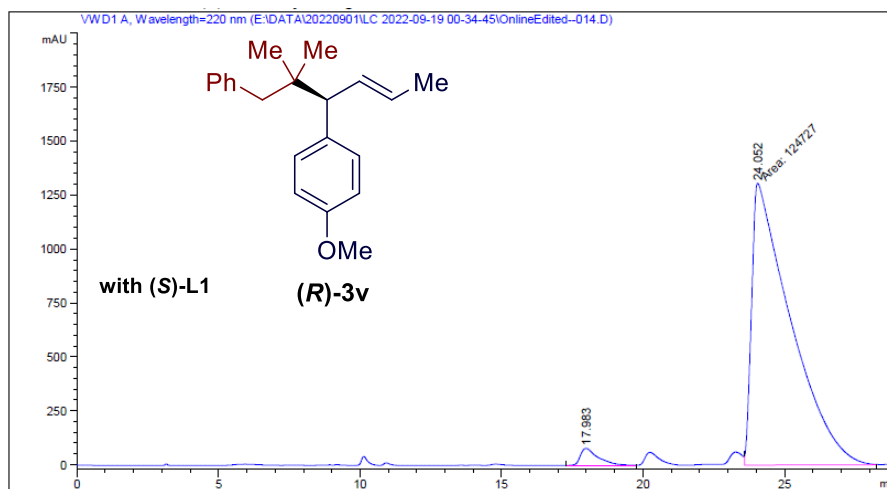

| Peak # | RetTime [min] | Type | Width [min] | Area [mAU*s] | Height [mAU] | Area %  |
|--------|---------------|------|-------------|--------------|--------------|---------|
| 1      | 17.983        | BV   | 0.6281      | 3422.35889   | 78.73964     | 2.6706  |
| 2      | 24.052        | MF   | 1.5919      | 1.24727e5    | 1305.83105   | 97.3294 |

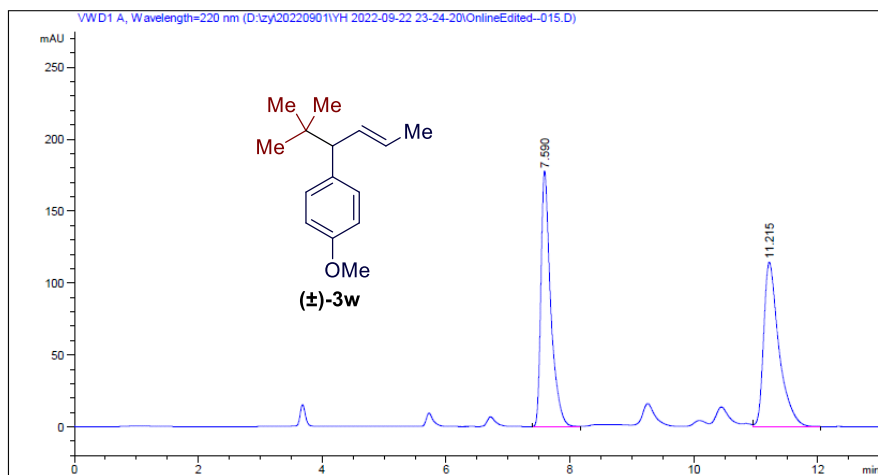

| 峰 # | 保留时间 [min] | 类型 | 峰宽 [min] | 峰面积 [mAU*s] | 峰高 [mAU]  | 峰面积 %   |
|-----|------------|----|----------|-------------|-----------|---------|
| 1   | 7.590      | BB | 0.1618   | 1950.30652  | 178.03227 | 49.9746 |
| 2   | 11.215     | VB | 0.2532   | 1952.28870  | 114.36316 | 50.0254 |

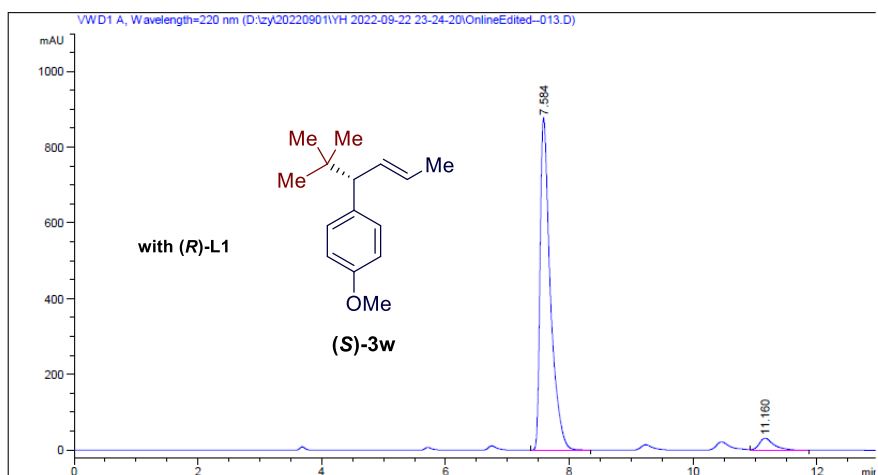

| 峰 # | 保留时间 [min] | 类型 | 峰宽 [min] | 峰面积 [mAU*s] | 峰高 [mAU]  | 峰面积 %   |
|-----|------------|----|----------|-------------|-----------|---------|
| 1   | 7.584      | BB | 0.1682   | 1.00925e4   | 877.30048 | 95.1781 |
| 2   | 11.160     | VB | 0.2443   | 511.30676   | 31.33866  | 4.8219  |

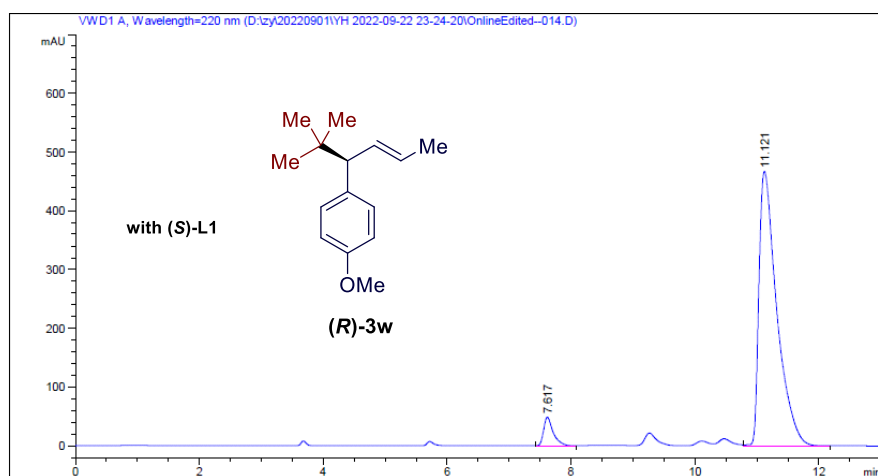

| 峰 # | 保留时间 [min] | 类型 | 峰宽 [min] | 峰面积 [mAU*s] | 峰高 [mAU]  | 峰面积 %   |
|-----|------------|----|----------|-------------|-----------|---------|
| 1   | 7.617      | BB | 0.1588   | 526.09283   | 48.80503  | 5.3450  |
| 2   | 11.121     | VB | 0.2889   | 9316.60352  | 466.72687 | 94.6550 |

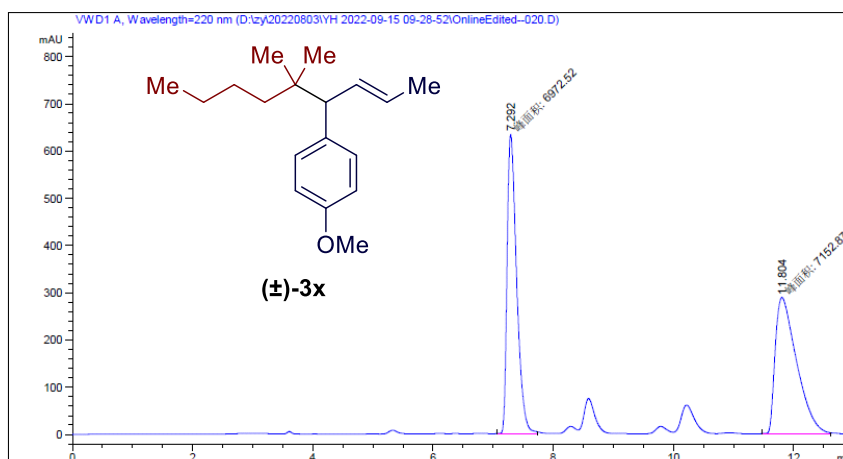

| 峰 # | 保留时间 [min] | 类型 | 峰宽 [min] | 峰面积 [mAU*s] | 峰高 [mAU]  | 峰面积 %   |
|-----|------------|----|----------|-------------|-----------|---------|
| 1   | 7.292      | FM | 0.1835   | 6972.51611  | 633.36646 | 49.3616 |
| 2   | 11.804     | FM | 0.4130   | 7152.87256  | 288.62186 | 50.6384 |

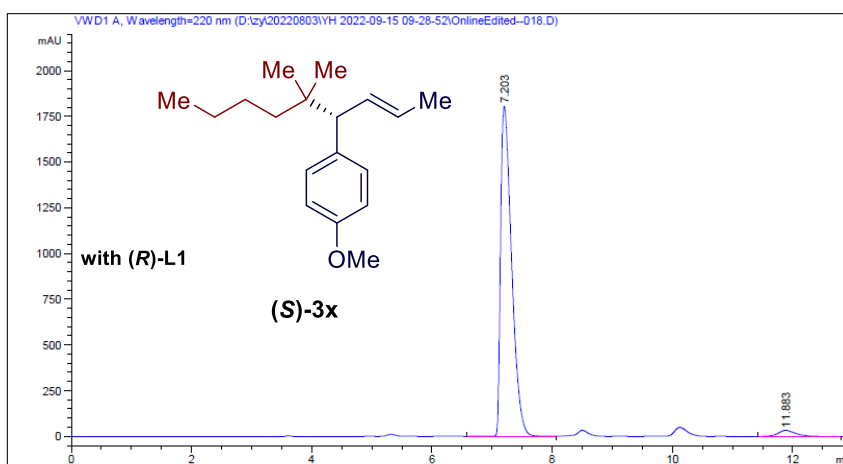

| 峰 # | 保留时间 [min] | 类型   | 峰宽 [min] | 峰面积 [mAU*s] | 峰高 [mAU]   | 峰面积 %   |
|-----|------------|------|----------|-------------|------------|---------|
| 1   | 7.203      | VV R | 0.1932   | 2.29199e4   | 1804.09949 | 97.2379 |
| 2   | 11.883     | BB   | 0.2905   | 651.05457   | 32.38744   | 2.7621  |

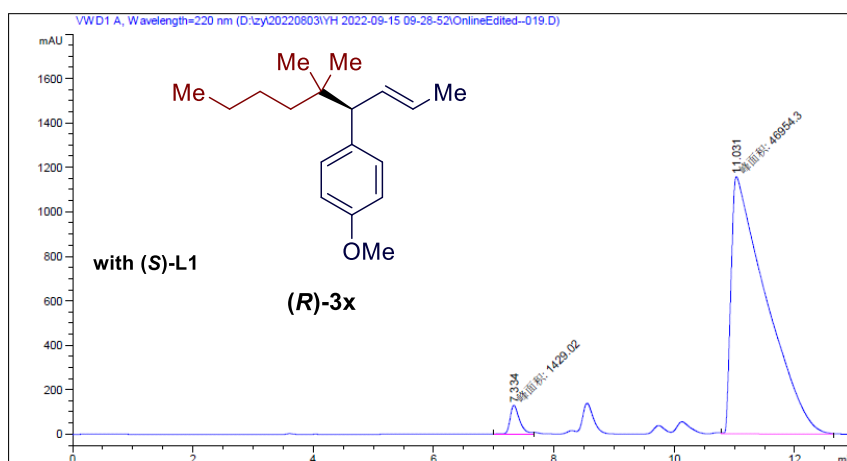

| 峰 # | 保留时间 [min] | 类型 | 峰宽 [min] | 峰面积 [mAU*s] | 峰高 [mAU]   | 峰面积 %   |
|-----|------------|----|----------|-------------|------------|---------|
| 1   | 7.334      | FM | 0.1836   | 1429.02173  | 129.71706  | 2.9535  |
| 2   | 11.031     | MF | 0.6766   | 4.69543e4   | 1156.53870 | 97.0465 |

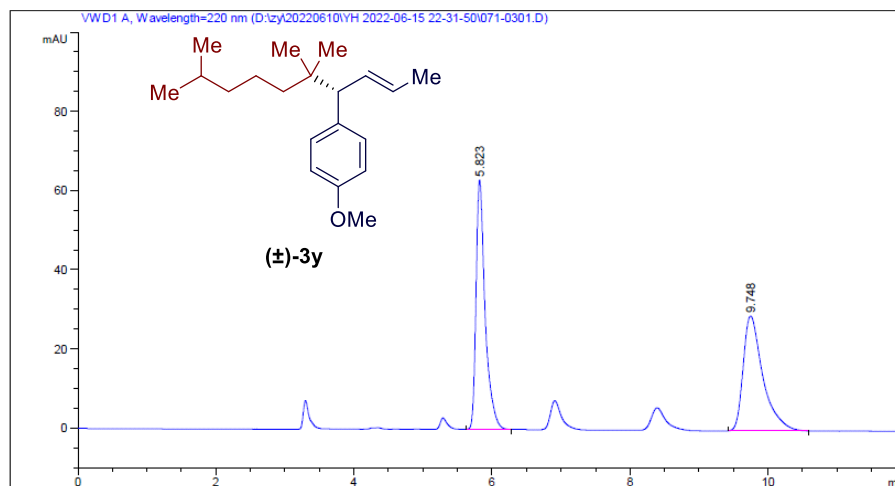

| 峰 # | 保留时间 [min] | 类型 | 峰宽 [min] | 峰面积 [mAU*s] | 峰高 [mAU] | 峰面积 %   |
|-----|------------|----|----------|-------------|----------|---------|
| 1   | 5.823      | BB | 0.1344   | 575.71326   | 63.09723 | 49.9978 |
| 2   | 9.748      | BB | 0.2972   | 575.76337   | 29.04870 | 50.0022 |

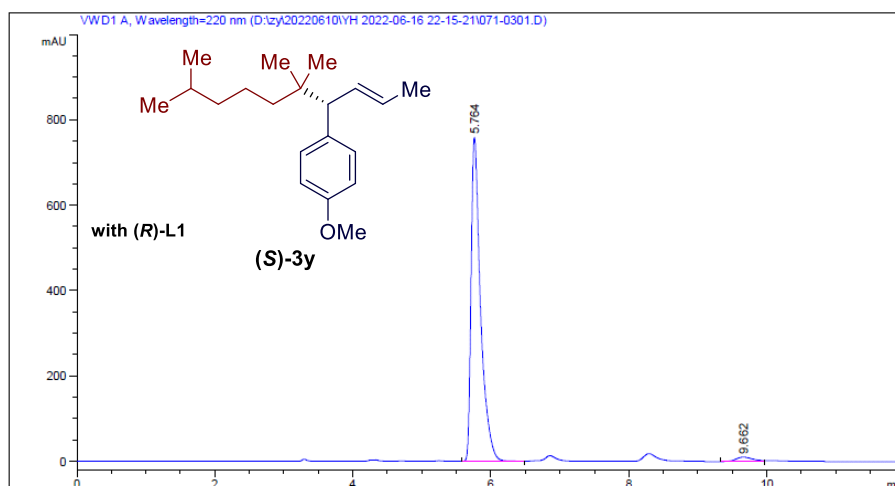

| 峰 # | 保留时间 [min] | 类型 | 峰宽 [min] | 峰面积 [mAU*s] | 峰高 [mAU]  | 峰面积 %   |
|-----|------------|----|----------|-------------|-----------|---------|
| 1   | 5.764      | BV | 0.1426   | 7262.29199  | 759.13556 | 97.5773 |
| 2   | 9.662      | BV | 0.2644   | 180.31424   | 10.34189  | 2.4227  |

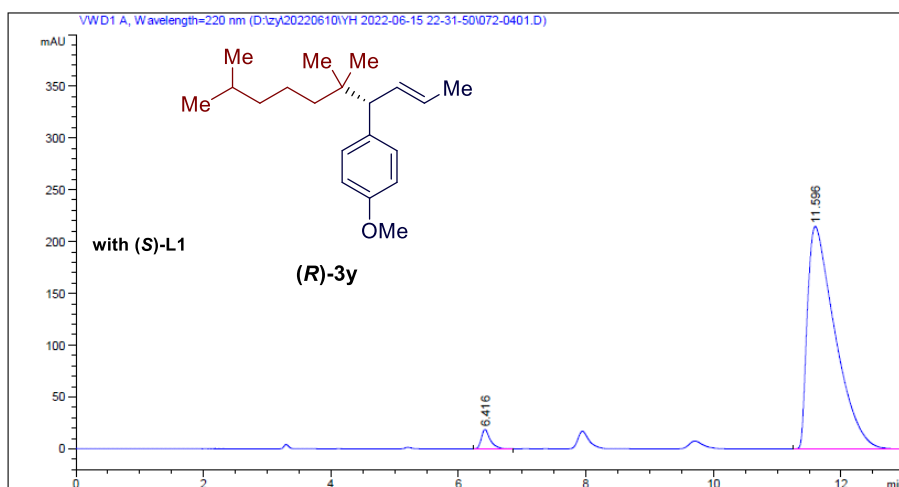

| 峰 # | 保留时间 [min] | 类型 | 峰宽 [min] | 峰面积 [mAU*s] | 峰高 [mAU]  | 峰面积 %   |
|-----|------------|----|----------|-------------|-----------|---------|
| 1   | 6.416      | BB | 0.1430   | 180.80946   | 18.66933  | 2.7275  |
| 2   | 11.596     | BB | 0.4491   | 6448.20996  | 214.84837 | 97.2725 |



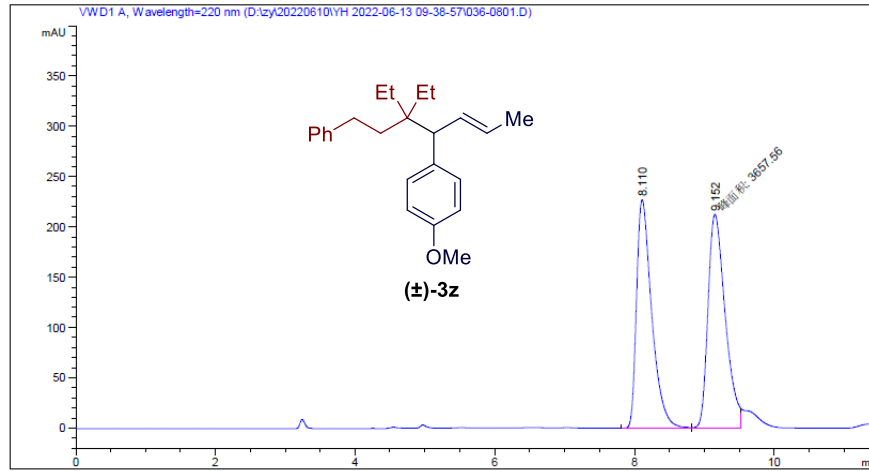

| 峰 # | 保留时间 [min] | 类型 | 峰宽 [min] | 峰面积 [mAU*s] | 峰高 [mAU]  | 峰面积 %   |
|-----|------------|----|----------|-------------|-----------|---------|
| 1   | 8.110      | BV | 0.2256   | 3430.09351  | 227.20183 | 48.3953 |
| 2   | 9.152      | MF | 0.2867   | 3657.56299  | 212.59645 | 51.6047 |

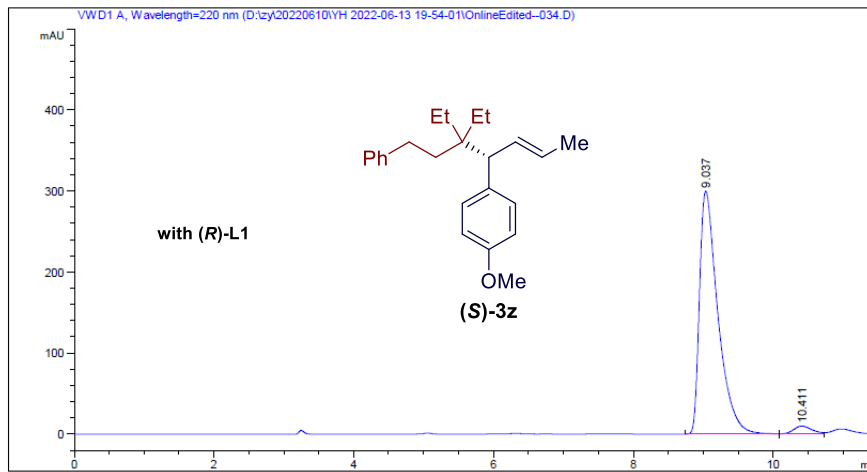

| 峰 # | 保留时间 [min] | 类型 | 峰宽 [min] | 峰面积 [mAU*s] | 峰高 [mAU]  | 峰面积 %   |
|-----|------------|----|----------|-------------|-----------|---------|
| 1   | 9.037      | BV | 0.2709   | 5469.47168  | 299.68872 | 96.7326 |
| 2   | 10.411     | VV | 0.2850   | 184.74428   | 9.84127   | 3.2674  |

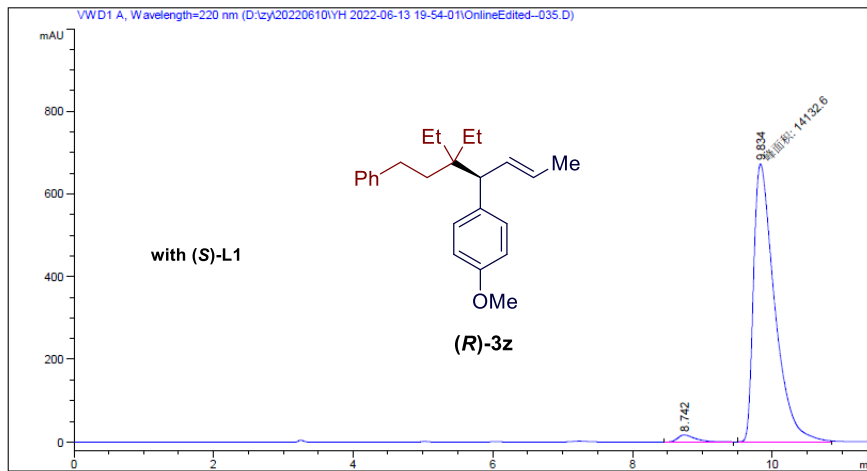

| 峰 # | 保留时间 [min] | 类型 | 峰宽 [min] | 峰面积 [mAU*s] | 峰高 [mAU]  | 峰面积 %   |
|-----|------------|----|----------|-------------|-----------|---------|
| 1   | 8.742      | BB | 0.2623   | 312.27695   | 17.32033  | 2.1619  |
| 2   | 9.834      | MF | 0.3504   | 1.41326e4   | 672.21332 | 97.8381 |

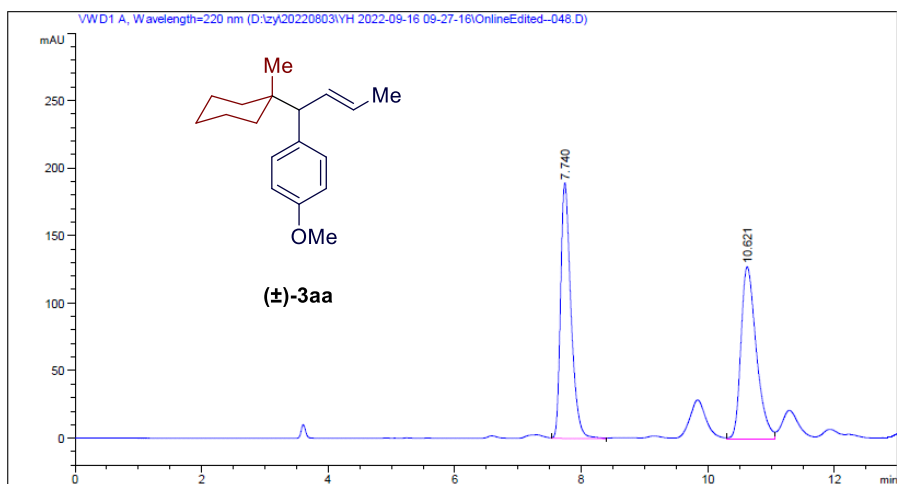

| 峰 # | 保留时间 [min] | 类型 | 峰宽 [min] | 峰面积 [mAU*s] | 峰高 [mAU]  | 峰面积 %   |
|-----|------------|----|----------|-------------|-----------|---------|
| 1   | 7.740      | VB | 0.1746   | 2153.05396  | 189.42548 | 50.0537 |
| 2   | 10.621     | VV | 0.2527   | 2148.42993  | 127.45947 | 49.9463 |

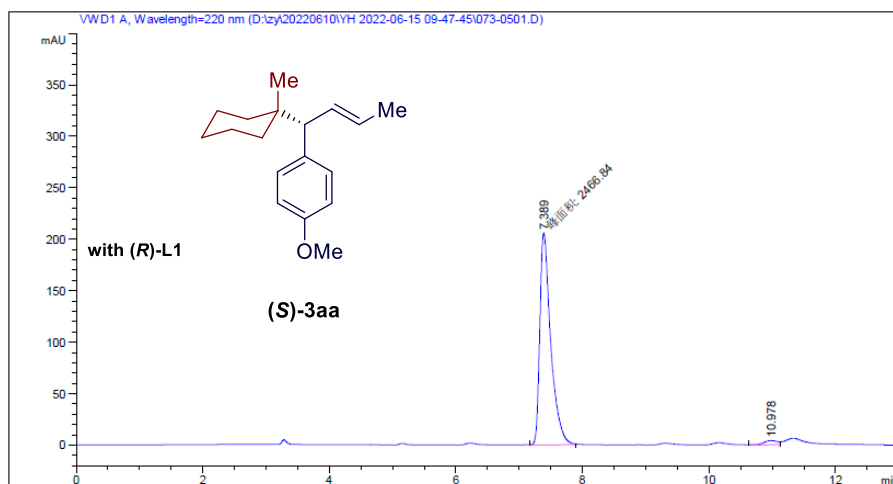

| 峰 # | 保留时间 [min] | 类型 | 峰宽 [min] | 峰面积 [mAU*s] | 峰高 [mAU]  | 峰面积 %   |
|-----|------------|----|----------|-------------|-----------|---------|
| 1   | 7.389      | FM | 0.1998   | 2466.83936  | 205.78412 | 97.6381 |
| 2   | 10.978     | BV | 0.2083   | 59.67376    | 4.00491   | 2.3619  |

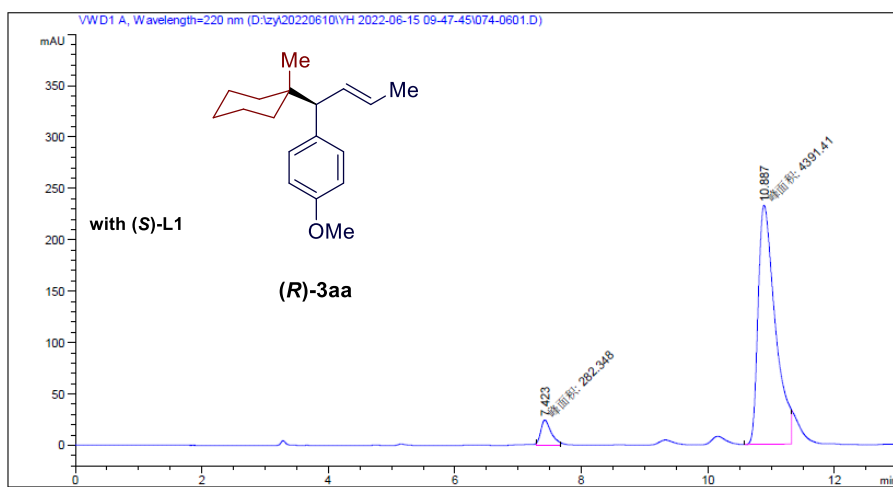

| 峰 # | 保留时间 [min] | 类型 | 峰宽 [min] | 峰面积 [mAU*s] | 峰高 [mAU]  | 峰面积 %   |
|-----|------------|----|----------|-------------|-----------|---------|
| 1   | 7.423      | MF | 0.1921   | 282.34793   | 24.49025  | 6.0411  |
| 2   | 10.887     | MF | 0.3146   | 4391.41357  | 232.66273 | 93.9589 |

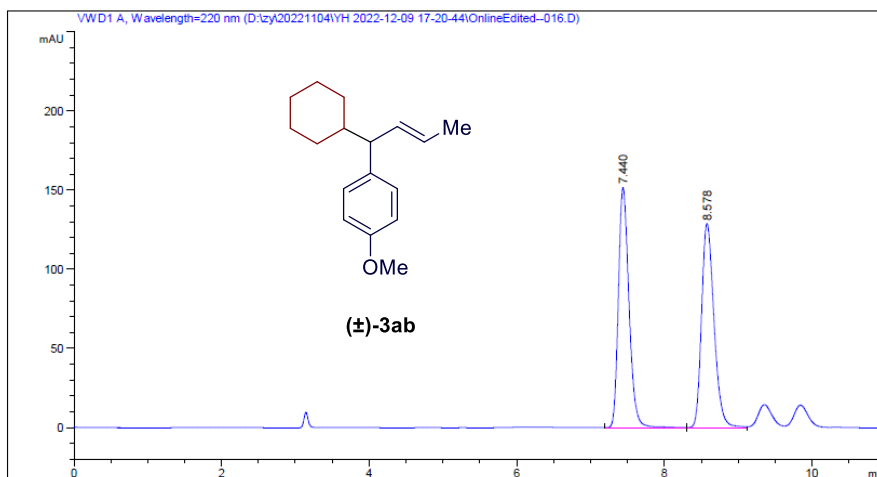

| 峰 # | 保留时间 [min] | 类型 | 峰宽 [min] | 峰面积 [mAU*s] | 峰高 [mAU]  | 峰面积 %   |
|-----|------------|----|----------|-------------|-----------|---------|
| 1   | 7.440      | BB | 0.1536   | 1511.25232  | 151.83400 | 50.0388 |
| 2   | 8.578      | BV | 0.1805   | 1508.90613  | 129.00020 | 49.9612 |

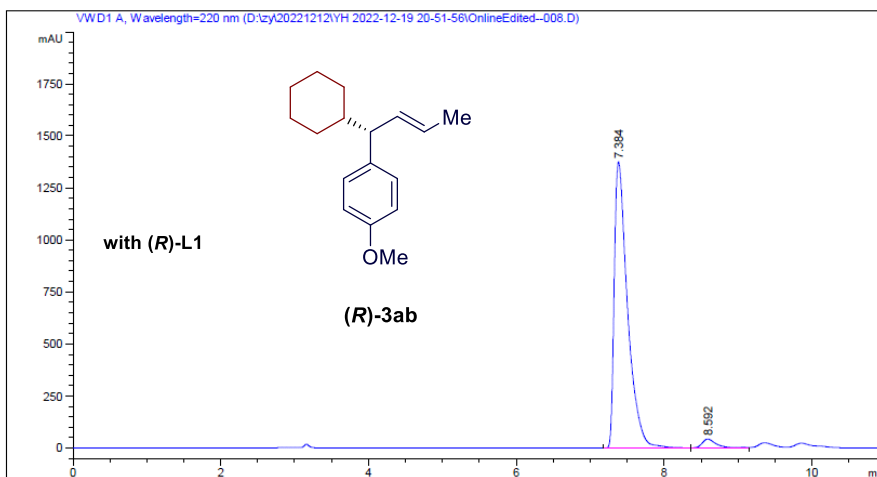

| 峰 # | 保留时间 [min] | 类型   | 峰宽 [min] | 峰面积 [mAU*s] | 峰高 [mAU]   | 峰面积 %   |
|-----|------------|------|----------|-------------|------------|---------|
| 1   | 7.384      | BB   | 0.1858   | 1.71275e4   | 1375.55969 | 96.8280 |
| 2   | 8.592      | BV R | 0.1923   | 561.09070   | 41.78769   | 3.1720  |

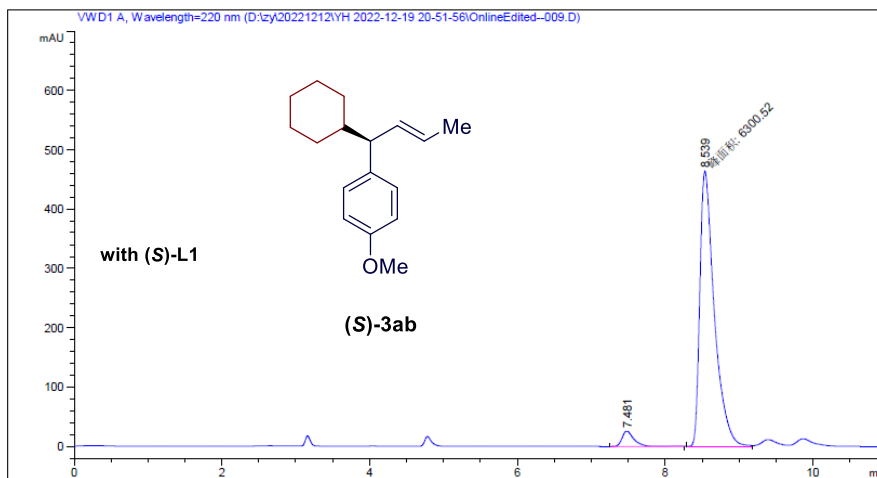

| 峰 # | 保留时间 [min] | 类型 | 峰宽 [min] | 峰面积 [mAU*s] | 峰高 [mAU]  | 峰面积 %   |
|-----|------------|----|----------|-------------|-----------|---------|
| 1   | 7.481      | BB | 0.1654   | 290.47113   | 25.99231  | 4.4071  |
| 2   | 8.539      | MF | 0.2265   | 6300.51758  | 463.63486 | 95.5929 |

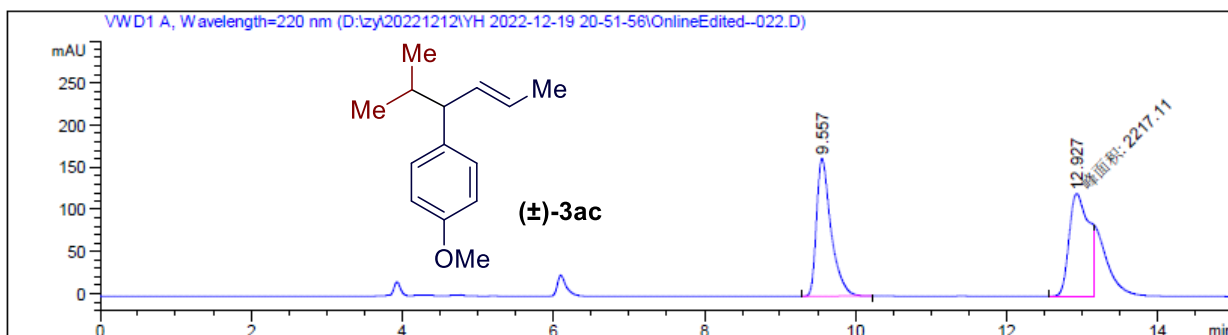

| 峰 # | 保留时间 [min] | 类型 | 峰宽 [min] | 峰面积 [mAU*s] | 峰高 [mAU]  | 峰面积 %   |
|-----|------------|----|----------|-------------|-----------|---------|
| 1   | 9.557      | BB | 0.1999   | 2179.84082  | 163.10854 | 49.5762 |
| 2   | 12.927     | MF | 0.3035   | 2217.11182  | 121.74976 | 50.4238 |

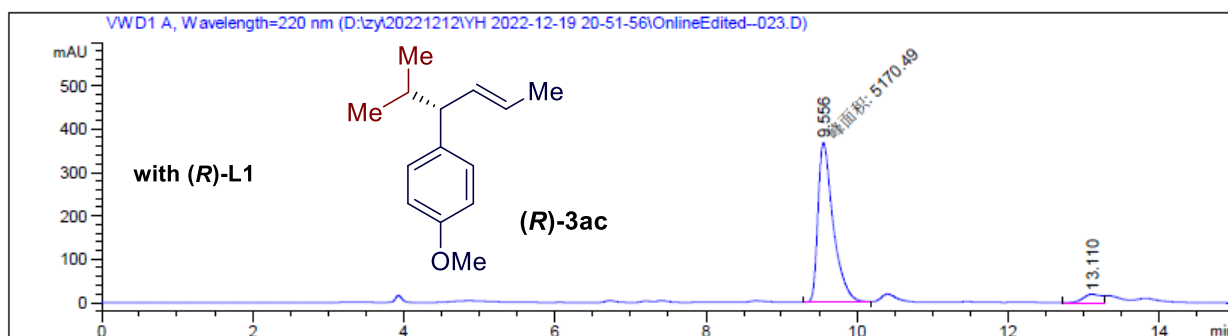

| 峰 # | 保留时间 [min] | 类型 | 峰宽 [min] | 峰面积 [mAU*s] | 峰高 [mAU]  | 峰面积 %   |
|-----|------------|----|----------|-------------|-----------|---------|
| 1   | 9.556      | MF | 0.2344   | 5170.48730  | 367.69540 | 94.2132 |
| 2   | 13.110     | BV | 0.2468   | 317.58459   | 19.02051  | 5.7868  |

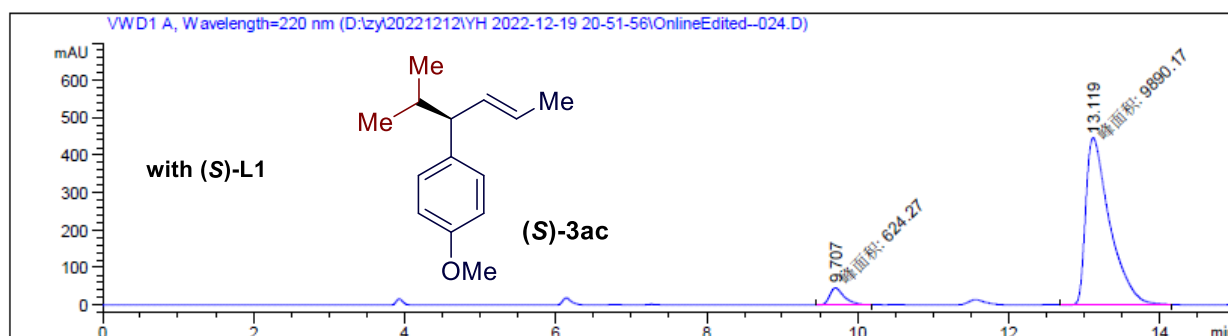

| 峰 # | 保留时间 [min] | 类型 | 峰宽 [min] | 峰面积 [mAU*s] | 峰高 [mAU]  | 峰面积 %   |
|-----|------------|----|----------|-------------|-----------|---------|
| 1   | 9.707      | MF | 0.2280   | 624.27020   | 45.63062  | 5.9373  |
| 2   | 13.119     | MF | 0.3692   | 9890.17188  | 446.45493 | 94.0627 |
